# Supplementary material
Source: PubMed Central journal article supplement (PMC2972971)
Supplement: 1013555107_st01.pdf [file 1013555107_st01.pdf]

**Supplemental table S1.** Echocardiographic data.

HW/BW: Heart weight to body weight ratio; AWTh: Anterior wall thickness; PWT: Posterior wall thickness; EDD: End-diastolic dimension; ESD: end-systolic dimension; FS: Fractional shortening.

|                  | <b>HW/BW ratio<br/>(mg/g)</b> | <b>AWTh (mm)</b> | <b>PWT (mm)</b> | <b>EDD (mm)</b> | <b>ESD (mm)</b> | <b>FS (%)</b> |
|------------------|-------------------------------|------------------|-----------------|-----------------|-----------------|---------------|
| <b>WT (n=3)</b>  | 4.45 ± 0.25                   | 0.84 ± 0.05      | 0.81 ± 0.01     | 3.30 ± 0.02     | 1.20 ± 0.14     | 0.64 ± 0.04   |
| <b>CNA (n=3)</b> | 12.4 ± 0.71                   | 1.05 ± 0.03      | 1.31 ± 0.13     | 4.47 ± 0.18     | 2.65 ± 0.10     | 0.41 ± 0.01   |
| <b>pValue</b>    | <0.0001                       | 0.023            | 0.017           | 0.003           | 0.001           | 0.007         |
