# Supplementary material
Source: PubMed Central journal article supplement (PMC2972971)
Supplement: 1013555107_st02.pdf [file 1013555107_st02.pdf]

**Supplemental table S2.** List of the 1918 proteins (with UniProt accessions and protein names) with relative fold change of expression between CNA and WT mice (Log<sub>2</sub> scale) and the associated pValue (ranked from lowest to highest, Significant proteins are italicized).

| SwissProt Name | ProteinName                                                                  | FoldChange | pValue            |
|----------------|------------------------------------------------------------------------------|------------|-------------------|
| FHL1_MOUSE     | Four and a half LIM domains protein 1;                                       | 2.82       | <i>0.00000006</i> |
| KCRS_MOUSE     | Creatine kinase S-type, mitochondrial;                                       | -1.02      | <i>0.0000001</i>  |
| MYH7_MOUSE     | Myosin-7;                                                                    | 4.82       | <i>0.0000009</i>  |
| G6PI_MOUSE     | Glucose-6-phosphate isomerase;                                               | 1.11       | <i>0.000002</i>   |
| SUCB1_MOUSE    | Succinyl-CoA ligase [ADP-forming] subunit beta, mitochondrial;               | -1.48      | <i>0.000003</i>   |
| ETFA_MOUSE     | Electron transfer flavoprotein subunit alpha, mitochondrial;                 | -0.78      | <i>0.000008</i>   |
| Q3THX5_MOUSE   | Putative uncharacterized protein;                                            | 2.42       | <i>0.00002</i>    |
| CRYAB_MOUSE    | Alpha-crystallin B chain;                                                    | 0.80       | <i>0.00003</i>    |
| ENOB_MOUSE     | Beta-enolase;                                                                | -0.75      | <i>0.00004</i>    |
| RTN4_MOUSE     | Reticulon-4;                                                                 | 3.95       | <i>0.00005</i>    |
| THIM_MOUSE     | 3-ketoacyl-CoA thiolase, mitochondrial;                                      | -1.16      | <i>0.00005</i>    |
| SLMAP_MOUSE    | Sarcolemmal membrane-associated protein;                                     | 3.81       | <i>0.00006</i>    |
| CISY_MOUSE     | Citrate synthase, mitochondrial;                                             | -1.70      | <i>0.00007</i>    |
| O55124_MOUSE   | M-protein;                                                                   | -1.99      | <i>0.0001</i>     |
| SPTB2_MOUSE    | Spectrin beta chain, brain 1;                                                | 2.28       | <i>0.0001</i>     |
| TRFE_MOUSE     | Serotransferrin;                                                             | 0.83       | <i>0.0001</i>     |
| ACSL1_MOUSE    | Long-chain-fatty-acid--CoA ligase 1;                                         | -1.00      | <i>0.0002</i>     |
| ANXA2_MOUSE    | Annexin A2;                                                                  | 1.19       | <i>0.0002</i>     |
| BDH_MOUSE      | D-beta-hydroxybutyrate dehydrogenase, mitochondrial;                         | 2.20       | <i>0.0002</i>     |
| EHD1_MOUSE     | EH domain-containing protein 1;                                              | -2.42      | <i>0.0002</i>     |
| LMCD1_MOUSE    | LIM and cysteine-rich domains protein 1;                                     | 2.85       | <i>0.0002</i>     |
| PEX19_MOUSE    | Prefoldin subunit 2;                                                         | 1.81       | <i>0.0002</i>     |
| SCOT1_MOUSE    | Succinyl-CoA:3-ketoacid-coenzyme A transferase 1, mitochondrial;             | -1.12      | <i>0.0002</i>     |
| SPTA2_MOUSE    | Spectrin alpha chain, brain;                                                 | 1.32       | <i>0.0002</i>     |
| ACADV_MOUSE    | Very long-chain specific acyl-CoA dehydrogenase, mitochondrial;              | -0.69      | <i>0.0003</i>     |
| Q3U131_MOUSE   | Putative uncharacterized protein;                                            | 2.50       | <i>0.0003</i>     |
| ACTS_MOUSE     | Actin, alpha skeletal muscle;                                                | 3.70       | <i>0.0004</i>     |
| CES3_MOUSE     | Carboxylesterase 3;                                                          | -4.61      | <i>0.0004</i>     |
| HSPB6_MOUSE    | Heat shock protein beta-6;                                                   | 0.76       | <i>0.0004</i>     |
| LEG1_MOUSE     | Galectin-1;                                                                  | 1.38       | <i>0.0004</i>     |
| CH60_MOUSE     | 60 kDa heat shock protein, mitochondrial;                                    | -1.16      | <i>0.0005</i>     |
| PICA_MOUSE     | Protein-L-isoaspartate(D-aspartate) O-methyltransferase;                     | 2.22       | <i>0.0005</i>     |
| Q3U3J1_MOUSE   | Branched chain ketoacid dehydrogenase E1, alpha polypeptide;                 | -2.00      | <i>0.0005</i>     |
| ATP5J_MOUSE    | ATP synthase-coupling factor 6, mitochondrial;                               | 1.12       | <i>0.0006</i>     |
| DEST_MOUSE     | Dextrin;                                                                     | 0.96       | <i>0.0006</i>     |
| NDUA9_MOUSE    | NADH dehydrogenase [ubiquinone] 1 alpha subcomplex subunit 9, mitochondrial; | -1.19      | <i>0.0007</i>     |
| HS90B_MOUSE    | Heat shock protein HSP 90-beta;                                              | 0.96       | <i>0.0008</i>     |
| ACON_MOUSE     | Aconitate hydratase, mitochondrial;                                          | -0.39      | <i>0.0009</i>     |
| ACOT1_MOUSE    | Acyl-coenzyme A thioesterase 1;                                              | -2.28      | <i>0.0009</i>     |
| ALAT1_MOUSE    | Alanine aminotransferase 1;                                                  | -5.64      | <i>0.0009</i>     |
| TBB2A_MOUSE    | Tubulin beta-2A chain;                                                       | 0.52       | <i>0.0009</i>     |

|              |                                                                                                             |       |        |
|--------------|-------------------------------------------------------------------------------------------------------------|-------|--------|
| CALR_MOUSE   | Calreticulin;                                                                                               | 1.36  | 0.001  |
| SERPH_MOUSE  | Serpin H1;                                                                                                  | 1.29  | 0.001  |
| ECHM_MOUSE   | Enoyl-CoA hydratase, mitochondrial;                                                                         | -1.24 | 0.0011 |
| HS71A_MOUSE  | Heat shock 70 kDa protein 1A;                                                                               | 1.03  | 0.0011 |
| HSPB1_MOUSE  | Heat shock protein beta-1;                                                                                  | 0.74  | 0.0011 |
| RHOA_MOUSE   | Transforming protein RhoA;                                                                                  | 2.35  | 0.0011 |
| OAT_MOUSE    | Ornithine aminotransferase, mitochondrial                                                                   | -1.71 | 0.0014 |
| TBB6_MOUSE   | Tubulin beta-6 chain;                                                                                       | 1.51  | 0.0014 |
| BAG3_MOUSE   | BAG family molecular chaperone regulator 3;                                                                 | 1.31  | 0.0015 |
| ACOT2_MOUSE  | Acyl-coenzyme A thioesterase 2, mitochondrial;                                                              | -2.10 | 0.0017 |
| MYH10_MOUSE  | Myosin-10;                                                                                                  | 3.33  | 0.0017 |
| HBB2_MOUSE   | Hemoglobin subunit beta-2;                                                                                  | -0.94 | 0.0019 |
| LDB3_MOUSE   | LIM domain-binding protein 3;                                                                               | 0.67  | 0.002  |
| LEGLA_MOUSE  | Galectin-related protein A;                                                                                 | 4.58  | 0.0021 |
| ACE_MOUSE    | Angiotensin-converting enzyme;                                                                              | 1.69  | 0.0022 |
| MSRB3_MOUSE  | Methionine-R-sulfoxide reductase B3, mitochondrial;                                                         | 2.63  | 0.0022 |
| Q3UAV7_MOUSE | Isocitrate dehydrogenase 1 (NADP+), soluble, isoform CRA_a;                                                 | -1.49 | 0.0022 |
| AL4A1_MOUSE  | Delta-1-pyrroline-5-carboxylate dehydrogenase, mitochondrial;                                               | -0.98 | 0.0023 |
| CTGF_MOUSE   | Connective tissue growth factor;                                                                            | 4.70  | 0.0024 |
| NRAP_MOUSE   | Nebulin-related-anchoring protein;                                                                          | 4.81  | 0.0024 |
| ECHD2_MOUSE  | Enoyl-CoA hydratase domain-containing protein 2, mitochondrial;                                             | -2.06 | 0.0025 |
| ARHL1_MOUSE  | [Protein ADP-ribosylarginine] hydrolase-like protein 1;                                                     | 1.10  | 0.0026 |
| MYLK3_MOUSE  | Putative myosin light chain kinase 3;                                                                       | -2.21 | 0.0027 |
| MOES_MOUSE   | Moesin;                                                                                                     | 1.35  | 0.0029 |
| NDUAA_MOUSE  | NADH dehydrogenase [ubiquinone] 1 alpha subcomplex subunit 10, mitochondrial;                               | -1.21 | 0.0029 |
| VDAC3_MOUSE  | Voltage-dependent anion-selective channel protein 3;                                                        | -1.14 | 0.003  |
| ANXA5_MOUSE  | Annexin A5;                                                                                                 | 1.79  | 0.0031 |
| DLDH_MOUSE   | Dihydrolipoyl dehydrogenase, mitochondrial;                                                                 | -0.69 | 0.0031 |
| GRP78_MOUSE  | 78 kDa glucose-regulated protein;                                                                           | 0.74  | 0.0031 |
| HCDH_MOUSE   | Hydroxyacyl-coenzyme A dehydrogenase, mitochondrial;                                                        | -1.18 | 0.0031 |
| TSP4_MOUSE   | Thrombospondin-4;                                                                                           | 4.46  | 0.0031 |
| ODB2_MOUSE   | Lipoamide acyltransferase component of branched-chain alpha-keto acid dehydrogenase complex, mitochondrial; | -2.29 | 0.0034 |
| Q3UIA9_MOUSE | Fumarate hydratase 1;                                                                                       | -1.30 | 0.0034 |
| DECR_MOUSE   | 2,4-dienoyl-CoA reductase, mitochondrial;                                                                   | -0.78 | 0.0036 |
| MAAI_MOUSE   | Maleylacetoacetate isomerase;                                                                               | -2.32 | 0.0036 |
| SIRT5_MOUSE  | NAD-dependent deacetylase sirtuin-5;                                                                        | -1.83 | 0.0037 |
| SODM_MOUSE   | Superoxide dismutase [Mn], mitochondrial;                                                                   | -0.91 | 0.0039 |
| A0A5E3_MOUSE | LOC100046793 protein;                                                                                       | 0.77  | 0.0043 |
| COX2_MOUSE   | Cytochrome c oxidase subunit 2;                                                                             | -1.78 | 0.0044 |
| CTNA1_MOUSE  | Catenin alpha-1;                                                                                            | 1.72  | 0.0047 |
| THIOM_MOUSE  | Thioredoxin, mitochondrial;                                                                                 | -2.00 | 0.0048 |
| MK14_MOUSE   | Mitogen-activated protein kinase 14;                                                                        | -4.32 | 0.0049 |
| ENDD1_MOUSE  | Endonuclease domain-containing 1 protein;                                                                   | 5.39  | 0.005  |
| KLC1_MOUSE   | Kinesin light chain 1;                                                                                      | 2.25  | 0.0054 |
| A8DUK7_MOUSE | Beta-globin;                                                                                                | -0.66 | 0.0056 |
| DESM_MOUSE   | Desmin;                                                                                                     | 1.12  | 0.0056 |
| THTM_MOUSE   | 3-mercaptopyruvate sulfurtransferase;                                                                       | -1.74 | 0.0056 |
| ENPL_MOUSE   | Endoplasmin;                                                                                                | 1.15  | 0.0057 |

|              |                                                                       |       |        |
|--------------|-----------------------------------------------------------------------|-------|--------|
| FUMH_MOUSE   | Fumarate hydratase, mitochondrial;                                    | -0.77 | 0.0066 |
| A1AT2_MOUSE  | Alpha-1-antitrypsin 1-2;                                              | -1.49 | 0.0067 |
| LRP1_MOUSE   | Prolow-density lipoprotein receptor-related protein 1;                | 2.86  | 0.0068 |
| NAMPT_MOUSE  | Nicotinamide phosphoribosyltransferase;                               | -1.34 | 0.0068 |
| SRBS2_MOUSE  | Sorbin and SH3 domain-containing protein 2;                           | 1.69  | 0.0068 |
| CMC1_MOUSE   | Calcium-binding mitochondrial carrier protein Aralar1;                | -1.42 | 0.007  |
| FAHD1_MOUSE  | Fumarylacetoacetate hydrolase domain-containing protein 1;            | -2.05 | 0.007  |
| CYGB_MOUSE   | Cytoglobin;                                                           | 4.32  | 0.0071 |
| PDIA3_MOUSE  | [Pyruvate dehydrogenase [lipoamide]] kinase isozyme 1, mitochondrial; | 0.92  | 0.0071 |
| SUCA_MOUSE   | Succinyl-CoA ligase [GDP-forming] subunit alpha, mitochondrial;       | -0.93 | 0.0072 |
| MYH9_MOUSE   | Myosin-9;                                                             | 1.34  | 0.0074 |
| COMT_MOUSE   | Catechol O-methyltransferase;                                         | 1.56  | 0.0076 |
| LANC1_MOUSE  | LanC-like protein 1;                                                  | 3.58  | 0.0078 |
| TBA1A_MOUSE  | Tubulin alpha-1A chain;                                               | 0.71  | 0.0081 |
| Q6GTD3_MOUSE | NADH dehydrogenase (Ubiquinone) 1 alpha subcomplex, 9;                | -4.46 | 0.0083 |
| QIL1_MOUSE   | Protein QIL1;                                                         | -1.76 | 0.0085 |
| ANF_MOUSE    | Atrial natriuretic factor;                                            | 3.09  | 0.0086 |
| GLRX3_MOUSE  | Glutaredoxin-3;                                                       | -1.38 | 0.009  |
| RSU1_MOUSE   | Ras suppressor protein 1;                                             | 2.42  | 0.009  |
| VPS25_MOUSE  | Vacuolar protein-sorting-associated protein 25;                       | -4.58 | 0.009  |
| CACP_MOUSE   | Carnitine O-acetyltransferase;                                        | -1.95 | 0.0091 |
| SRCA_MOUSE   | Sarcalumenin;                                                         | -0.11 | 0.0091 |
| FAAA_MOUSE   | Fumarylacetoacetase;                                                  | -5.00 | 0.0095 |
| MYH4_MOUSE   | Myosin-4;                                                             | 1.12  | 0.0095 |
| PGAM2_MOUSE  | Basement membrane-specific heparan sulfate proteoglycan core protein; | 0.56  | 0.0095 |
| RAB1A_MOUSE  | Ras-related protein Rab-1A;                                           | 0.87  | 0.0096 |
| PLIN5_MOUSE  | Plastin-1;                                                            | -3.81 | 0.0098 |
| Q3TJM2_MOUSE | Coenzyme Q6 homolog (Yeast);                                          | -1.40 | 0.01   |
| HTRA2_MOUSE  | Heat shock protein beta-8;                                            | -1.37 | 0.0107 |
| KAD4_MOUSE   | Adenylate kinase isoenzyme 4, mitochondrial;                          | -1.34 | 0.0112 |
| RL3_MOUSE    | 60S ribosomal protein L3;                                             | 2.58  | 0.0112 |
| IDH3A_MOUSE  | Isocitrate dehydrogenase [NAD] subunit alpha, mitochondrial;          | -0.86 | 0.0113 |
| MPRI_MOUSE   | Cation-independent mannose-6-phosphate receptor;                      | 1.81  | 0.0114 |
| ASPN_MOUSE   | Asporin;                                                              | 4.32  | 0.0115 |
| SSDH_MOUSE   | Succinate-semialdehyde dehydrogenase, mitochondrial;                  | -2.94 | 0.0115 |
| UBA1Y_MOUSE  | Ubiquitin-like modifier-activating enzyme 1 Y;                        | 1.49  | 0.0119 |
| RTN3_MOUSE   | Reticulon-3;                                                          | 4.81  | 0.012  |
| CSN4_MOUSE   | COP9 signalosome complex subunit 4;                                   | 1.85  | 0.0122 |
| PDIA1_MOUSE  | Protein disulfide-isomerase A3;                                       | 1.39  | 0.0127 |
| HMGB1_MOUSE  | High mobility group protein B1;                                       | 1.18  | 0.0132 |
| SH3BG_MOUSE  | SH3 domain-binding glutamic acid-rich protein;                        | 1.93  | 0.0134 |
| LUM_MOUSE    | Lumican;                                                              | 0.91  | 0.0136 |
| GNAL_MOUSE   | Guanine nucleotide-binding protein G(olf) subunit alpha;              | 4.00  | 0.0142 |
| KAD2_MOUSE   | Adenylate kinase 2, mitochondrial;                                    | -1.65 | 0.0143 |
| ADT1_MOUSE   | ADP/ATP translocase 1;                                                | -0.71 | 0.0145 |
| DYSF_MOUSE   | Dysferlin;                                                            | 1.73  | 0.0145 |
| Q7TMQ1_MOUSE | Gap junction protein;                                                 | -2.38 | 0.0145 |
| PSB4_MOUSE   | Proteasome subunit beta type-4;                                       | -2.13 | 0.0147 |

|              |                                                               |       |        |
|--------------|---------------------------------------------------------------|-------|--------|
| ECHA_MOUSE   | Trifunctional enzyme subunit alpha, mitochondrial;            | -0.55 | 0.015  |
| PSMD2_MOUSE  | 26S proteasome non-ATPase regulatory subunit 2;               | 1.14  | 0.0152 |
| H2A1F_MOUSE  | Histone H2A type 1-F;                                         | 1.03  | 0.0154 |
| PP1A_MOUSE   | Protein phosphatase 1 regulatory subunit 7;                   | 1.55  | 0.0158 |
| HEMO_MOUSE   | Hemopexin;                                                    | 0.48  | 0.0161 |
| ENOA_MOUSE   | Alpha-enolase;                                                | -0.60 | 0.0163 |
| PSME1_MOUSE  | Proteasome activator complex subunit 1;                       | -1.84 | 0.0166 |
| MANF_MOUSE   | Mesencephalic astrocyte-derived neurotrophic factor;          | 1.91  | 0.0167 |
| SDPR_MOUSE   | Serum deprivation-response protein;                           | -1.42 | 0.0172 |
| Q3TTB7_MOUSE | Putative uncharacterized protein;                             | 2.74  | 0.0175 |
| ASPH_MOUSE   | Aspartyl/asparaginyl beta-hydroxylase;                        | 3.22  | 0.018  |
| FBN1_MOUSE   | Fibrillin-1;                                                  | 0.83  | 0.0182 |
| HBA_MOUSE    | Hemoglobin subunit alpha;                                     | -0.30 | 0.0186 |
| Q5SX22_MOUSE | Ubiquitin B;                                                  | 0.82  | 0.0187 |
| BCAT2_MOUSE  | Branched-chain-amino-acid aminotransferase, mitochondrial;    | -1.24 | 0.0189 |
| PROF1_MOUSE  | Proline synthase co-transcribed bacterial homolog protein;    | 0.77  | 0.0189 |
| COQ9_MOUSE   | Ubiquinone biosynthesis protein COQ9, mitochondrial;          | -0.87 | 0.0194 |
| FERM2_MOUSE  | Fermitin family homolog 2;                                    | 1.70  | 0.0202 |
| BLVRB_MOUSE  | Flavin reductase;                                             | -1.07 | 0.0206 |
| PCCB_MOUSE   | Propionyl-CoA carboxylase beta chain, mitochondrial;          | -1.27 | 0.0209 |
| RINI_MOUSE   | Ribonuclease inhibitor;                                       | 1.27  | 0.021  |
| FRIH_MOUSE   | Ferritin heavy chain;                                         | -2.50 | 0.0211 |
| FPRP_MOUSE   | Prostaglandin F2 receptor negative regulator;                 | 3.70  | 0.0213 |
| DPP3_MOUSE   | Dipeptidyl peptidase 3;                                       | 1.93  | 0.0214 |
| NDUA6_MOUSE  | NADH dehydrogenase [ubiquinone] 1 alpha subcomplex subunit 6; | -1.58 | 0.0219 |
| CD34_MOUSE   | Hematopoietic progenitor cell antigen CD34;                   | 2.81  | 0.0221 |
| TNNI3_MOUSE  | Troponin I, cardiac muscle;                                   | -0.67 | 0.0226 |
| O08804_MOUSE | NK13;                                                         | 0.90  | 0.0229 |
| PCYOX_MOUSE  | Programmed cell death 6-interacting protein;                  | 3.46  | 0.023  |
| SPG20_MOUSE  | Spartin;                                                      | 2.12  | 0.0231 |
| T10_MOUSE    | Ser/Thr-rich protein T10 in DGCR region;                      | -1.35 | 0.0233 |
| VDAC2_MOUSE  | Voltage-dependent anion-selective channel protein 2;          | -0.35 | 0.0234 |
| PURB_MOUSE   | Transcriptional activator protein Pur-beta;                   | 3.58  | 0.0238 |
| RCN3_MOUSE   | Reticulocalbin-3;                                             | 4.17  | 0.0238 |
| SYFA_MOUSE   | Phenylalanyl-tRNA synthetase alpha chain;                     | -2.32 | 0.0244 |
| CKAP4_MOUSE  | Cytoskeleton-associated protein 4;                            | 2.58  | 0.0246 |
| PP2BA_MOUSE  | Low molecular weight phosphotyrosine protein phosphatase;     | 4.00  | 0.0247 |
| KTN1_MOUSE   | Kinectin;                                                     | 1.00  | 0.0248 |
| NCPR_MOUSE   | NADPH--cytochrome P450 reductase;                             | 2.70  | 0.0252 |
| AL1A1_MOUSE  | Retinal dehydrogenase 1;                                      | 1.74  | 0.0253 |
| EMD_MOUSE    | Emerin;                                                       | 3.58  | 0.0255 |
| VIME_MOUSE   | Vimentin;                                                     | 0.83  | 0.0258 |
| NDKB_MOUSE   | Nucleoside diphosphate kinase B;                              | 0.46  | 0.0262 |
| AMRP_MOUSE   | Alpha-2-macroglobulin receptor-associated protein;            | 1.35  | 0.0263 |
| PGM5_MOUSE   | Phosphoglycolate phosphatase;                                 | 1.38  | 0.0263 |
| PRELP_MOUSE  | Profilin-1;                                                   | 2.70  | 0.0263 |
| O88493_MOUSE | Type VI collagen alpha 3 subunit;                             | 1.65  | 0.0267 |
| A1AT4_MOUSE  | Alpha-1-antitrypsin 1-4;                                      | -2.42 | 0.0268 |

|              |                                                                                                   |       |        |
|--------------|---------------------------------------------------------------------------------------------------|-------|--------|
| UBQL1_MOUSE  | Ubiquilin-1;                                                                                      | 1.46  | 0.027  |
| LRC20_MOUSE  | Leucine-rich repeat-containing protein 20;                                                        | 3.00  | 0.0274 |
| PYGM_MOUSE   | Glycogen phosphorylase, muscle form;                                                              | -0.55 | 0.0274 |
| GSTK1_MOUSE  | Glutathione S-transferase kappa 1;                                                                | -2.26 | 0.028  |
| RLA0_MOUSE   | 60S acidic ribosomal protein P0;                                                                  | -1.08 | 0.028  |
| KAT1_MOUSE   | Kynurenine--oxoglutarate transaminase 1;                                                          | -1.21 | 0.0281 |
| H2A2A_MOUSE  | Histone H2A type 2-A;                                                                             | 2.17  | 0.0283 |
| MAOX_MOUSE   | NADP-dependent malic enzyme;                                                                      | -2.07 | 0.0285 |
| DDAH2_MOUSE  | N(G),N(G)-dimethylarginine dimethylaminohydrolase 2;                                              | 2.09  | 0.0286 |
| CNN2_MOUSE   | Calponin-2;                                                                                       | 4.00  | 0.0287 |
| CYC_MOUSE    | Cytochrome c, somatic;                                                                            | -0.72 | 0.0287 |
| CAB39_MOUSE  | Calcium-binding protein 39;                                                                       | 3.81  | 0.0288 |
| PSMD3_MOUSE  | 26S proteasome non-ATPase regulatory subunit 3;                                                   | 2.81  | 0.0289 |
| SEPT7_MOUSE  | Septin-7;                                                                                         | 1.20  | 0.0289 |
| CMC2_MOUSE   | Calcium-binding mitochondrial carrier protein Aralar2;                                            | -0.95 | 0.0292 |
| DYL2_MOUSE   | Dynein light chain 2, cytoplasmic;                                                                | 1.68  | 0.0293 |
| RS16_MOUSE   | 40S ribosomal protein S16;                                                                        | 2.91  | 0.0293 |
| RNAS4_MOUSE  | Ribonuclease 4;                                                                                   | 4.00  | 0.0294 |
| WDR1_MOUSE   | WD repeat-containing protein 1;                                                                   | 1.18  | 0.0298 |
| ACTN2_MOUSE  | Alpha-actinin-2;                                                                                  | -1.43 | 0.03   |
| Q8CE68_MOUSE | Putative uncharacterized protein;                                                                 | 4.00  | 0.0308 |
| ATP5H_MOUSE  | ATP synthase subunit d, mitochondrial;                                                            | 0.28  | 0.0313 |
| DC1I2_MOUSE  | Cytoplasmic dynein 1 intermediate chain 2;                                                        | 0.77  | 0.0314 |
| TOM1_MOUSE   | Target of Myb protein 1;                                                                          | -0.90 | 0.0315 |
| MAON_MOUSE   | NADP-dependent malic enzyme, mitochondrial;                                                       | -1.39 | 0.0321 |
| AOFB_MOUSE   | Amine oxidase [flavin-containing] B;                                                              | -2.00 | 0.0322 |
| Q8VC96_MOUSE | Putative uncharacterized protein;                                                                 | -2.50 | 0.0322 |
| DBPA_MOUSE   | DNA-binding protein A;                                                                            | 4.00  | 0.0326 |
| HYEP_MOUSE   | Hexokinase-2;                                                                                     | 2.81  | 0.033  |
| MAP4_MOUSE   | Microtubule-associated protein 4;                                                                 | 0.59  | 0.033  |
| MTNB_MOUSE   | Probable methylthioribulose-1-phosphate dehydratase;                                              | -2.70 | 0.033  |
| KCRB_MOUSE   | Creatine kinase B-type;                                                                           | 0.69  | 0.0331 |
| P4HA1_MOUSE  | Prolyl 4-hydroxylase subunit alpha-1;                                                             | 4.00  | 0.0331 |
| CASQ2_MOUSE  | Calsequestrin-2;                                                                                  | 0.76  | 0.0338 |
| GIMA4_MOUSE  | GTPase IMAP family member 4;                                                                      | -1.65 | 0.0338 |
| Q3TIT9_MOUSE | Acetyl-Coenzyme A acyltransferase 2 (Mitochondrial 3-oxoacyl-Coenzyme A thiolase), isoform CRA_k; | -2.32 | 0.0338 |
| GRHPR_MOUSE  | Glyoxylate reductase/hydroxypyruvate reductase;                                                   | 0.60  | 0.0339 |
| NHLC2_MOUSE  | NHL repeat-containing protein 2;                                                                  | 1.58  | 0.0339 |
| ODBB_MOUSE   | 2-oxoisovalerate dehydrogenase subunit beta, mitochondrial;                                       | -1.70 | 0.0343 |
| Q8CIJ3_MOUSE | Eif3b protein;                                                                                    | 2.70  | 0.0345 |
| PGCP_MOUSE   | Prostaglandin E synthase 2;                                                                       | -1.66 | 0.0351 |
| FLNA_MOUSE   | Filamin-A;                                                                                        | 2.00  | 0.036  |
| TIM50_MOUSE  | Mitochondrial import inner membrane translocase subunit TIM50;                                    | 1.42  | 0.0364 |
| DYL1_MOUSE   | Dynein light chain 1, cytoplasmic;                                                                | 1.54  | 0.0366 |
| GELS_MOUSE   | Gelsolin;                                                                                         | 1.18  | 0.0366 |
| FABP4_MOUSE  | Fatty acid-binding protein, adipocyte;                                                            | -0.63 | 0.0368 |
| Q61484_MOUSE | Desmoyokin;                                                                                       | 1.03  | 0.0368 |
| THRB_MOUSE   | Prothrombin;                                                                                      | 3.58  | 0.0369 |

|              |                                                                          |       |        |
|--------------|--------------------------------------------------------------------------|-------|--------|
| ESYT2_MOUSE  | Extended synaptotagmin-2;                                                | 4.00  | 0.037  |
| LPPRC_MOUSE  | Leucine-rich PPR motif-containing protein, mitochondrial;                | -1.66 | 0.037  |
| TDRD5_MOUSE  | Tudor domain-containing protein 5;                                       | -2.32 | 0.037  |
| DPYL3_MOUSE  | Dihydropyrimidinase-related protein 3;                                   | 1.58  | 0.0371 |
| Q8QZV3_MOUSE | Dci protein;                                                             | -0.83 | 0.0372 |
| STAT3_MOUSE  | Signal transducer and activator of transcription 3;                      | 1.27  | 0.0372 |
| ASC_MOUSE    | Apoptosis-associated speck-like protein containing a CARD;               | -3.00 | 0.0373 |
| CYTC_MOUSE   | Cystatin-C;                                                              | 2.12  | 0.0375 |
| SPEG_MOUSE   | Striated muscle-specific serine/threonine-protein kinase;                | 1.35  | 0.038  |
| 1433Z_MOUSE  | 14-3-3 protein zeta/delta;                                               | 0.66  | 0.0381 |
| CY1_MOUSE    | Cytochrome c1, heme protein, mitochondrial                               | -0.70 | 0.0382 |
| AKA12_MOUSE  | A-kinase anchor protein 12;                                              | 1.22  | 0.0384 |
| CN159_MOUSE  | UPF0317 protein C14orf159 homolog, mitochondrial;                        | -2.58 | 0.0387 |
| MMAB_MOUSE   | Cob(II)yrinic acid a,c-diamide adenosyltransferase, mitochondrial;       | -3.58 | 0.0388 |
| PP1R7_MOUSE  | Serine/threonine-protein phosphatase 2B catalytic subunit alpha isoform; | 1.42  | 0.0388 |
| CAN2_MOUSE   | Calpain-2 catalytic subunit;                                             | 1.68  | 0.0389 |
| CLH_MOUSE    | Clathrin heavy chain 1;                                                  | 0.89  | 0.0389 |
| PGRC2_MOUSE  | Biglycan;                                                                | 1.58  | 0.0394 |
| PDLI3_MOUSE  | PDZ and LIM domain protein 5;                                            | 3.81  | 0.0395 |
| B1ART6_MOUSE | Aldehyde dehydrogenase family 3, subfamily A2;                           | 3.32  | 0.0398 |
| WNK1_MOUSE   | Serine/threonine-protein kinase WNK1;                                    | 3.81  | 0.0404 |
| QCR10_MOUSE  | Cytochrome b-c1 complex subunit 10;                                      | -3.58 | 0.0412 |
| POPD1_MOUSE  | Serine/threonine-protein phosphatase PP1-beta catalytic subunit;         | 1.47  | 0.0417 |
| RL28_MOUSE   | 60S ribosomal protein L28;                                               | 3.58  | 0.042  |
| M2OM_MOUSE   | Mitochondrial 2-oxoglutarate/malate carrier protein;                     | -1.81 | 0.0424 |
| MYO1C_MOUSE  | Myosin-Ic;                                                               | 2.09  | 0.0426 |
| CUL4A_MOUSE  | Cullin-4A;                                                               | 3.00  | 0.0427 |
| K2C79_MOUSE  | Keratin, type II cytoskeletal 79;                                        | -4.46 | 0.0429 |
| TOIP1_MOUSE  | Torsin-1A-interacting protein 1;                                         | 2.81  | 0.0433 |
| 5NTD_MOUSE   | 5'-nucleotidase;                                                         | 3.00  | 0.0434 |
| DCMC_MOUSE   | Malonyl-CoA decarboxylase, mitochondrial;                                | -2.32 | 0.0439 |
| ORN_MOUSE    | Oligoribonuclease, mitochondrial;                                        | 3.00  | 0.0442 |
| SCFD1_MOUSE  | Sec1 family domain-containing protein 1;                                 | 2.58  | 0.0442 |
| DP13A_MOUSE  | DCC-interacting protein 13-alpha;                                        | 1.32  | 0.0443 |
| NP1L1_MOUSE  | Nucleosome assembly protein 1-like 1;                                    | 2.70  | 0.0443 |
| SRPRB_MOUSE  | Signal recognition particle receptor subunit beta;                       | 2.00  | 0.0443 |
| S10AB_MOUSE  | Protein S100-A11;                                                        | 1.81  | 0.0444 |
| CDC42_MOUSE  | Cell division control protein 42 homolog;                                | 1.09  | 0.0447 |
| CRIP2_MOUSE  | Cysteine-rich protein 2;                                                 | -1.00 | 0.0449 |
| CPNS1_MOUSE  | Calpain small subunit 1;                                                 | 2.91  | 0.0452 |
| KCRM_MOUSE   | Creatine kinase M-type;                                                  | -0.55 | 0.0466 |
| BAT3_MOUSE   | Large proline-rich protein BAT3;                                         | -3.32 | 0.0468 |
| FBX40_MOUSE  | F-box only protein 40;                                                   | 2.32  | 0.0468 |
| PLIN3_MOUSE  | Perilipin-5;                                                             | -0.84 | 0.0468 |
| Q9QUN8_MOUSE | Beta-2-globin;                                                           | -0.45 | 0.0471 |
| E41L2_MOUSE  | Band 4.1-like protein 2;                                                 | 2.46  | 0.0479 |
| EFHD2_MOUSE  | EF-hand domain-containing protein D2;                                    | 3.46  | 0.0481 |
| USO1_MOUSE   | General vesicular transport factor p115;                                 | 3.32  | 0.0482 |

|              |                                                                   |       |        |
|--------------|-------------------------------------------------------------------|-------|--------|
| NP1L4_MOUSE  | Nucleosome assembly protein 1-like 4;                             | 1.39  | 0.0484 |
| NUCB1_MOUSE  | Nucleobindin-1;                                                   | 3.09  | 0.0485 |
| Q3U3K9_MOUSE | Putative uncharacterized protein;                                 | 4.00  | 0.0485 |
| CHSP1_MOUSE  | Calcium-regulated heat stable protein 1;                          | 1.42  | 0.0486 |
| MDHC_MOUSE   | Malate dehydrogenase, cytoplasmic;                                | -0.47 | 0.0486 |
| A2BFA6_MOUSE | Alpha-N-acetylglucosaminidase (Sanfilippo disease IIIB);          | 3.58  | 0.0494 |
| ATPB_MOUSE   | ATP synthase subunit beta, mitochondrial;                         | -0.32 | 0.0496 |
| TAU_MOUSE    | Microtubule-associated protein tau;                               | 2.58  | 0.0496 |
| SUGT1_MOUSE  | Suppressor of G2 allele of SKP1 homolog;                          | 1.42  | 0.0497 |
| TPD52_MOUSE  | Tumor protein D52;                                                | 4.00  | 0.0505 |
| Q3U5E1_MOUSE | Putative uncharacterized protein;                                 | 3.58  | 0.0511 |
| KCMF1_MOUSE  | E3 ubiquitin-protein ligase KCMF1;                                | 1.91  | 0.0512 |
| SMYD1_MOUSE  | SET and MYND domain-containing protein 1;                         | -2.25 | 0.0515 |
| 3HIDH_MOUSE  | 3-hydroxyisobutyrate dehydrogenase, mitochondrial;                | -0.85 | 0.0519 |
| AATC_MOUSE   | Aspartate aminotransferase, cytoplasmic;                          | -0.62 | 0.052  |
| KAD3_MOUSE   | GTP:AMP phosphotransferase, mitochondrial;                        | -2.25 | 0.0524 |
| Q91W85_MOUSE | Acyl-Coenzyme A dehydrogenase, short chain;                       | -1.81 | 0.0526 |
| PNCB_MOUSE   | Pyridoxine-5'-phosphate oxidase;                                  | -1.66 | 0.053  |
| PSB5_MOUSE   | Proteasome subunit beta type-5;                                   | 2.81  | 0.0531 |
| PTGIS_MOUSE  | Prostacyclin synthase;                                            | 2.58  | 0.0531 |
| GSTM5_MOUSE  | Glutathione S-transferase Mu 5;                                   | 1.38  | 0.0532 |
| CDS2_MOUSE   | Phosphatidate cytidyltransferase 2;                               | 3.58  | 0.0533 |
| OFUT2_MOUSE  | GDP-fucose protein O-fucosyltransferase 2;                        | 3.58  | 0.0535 |
| ML12B_MOUSE  | Myosin regulatory light chain 12B;                                | 1.15  | 0.0537 |
| GBB1_MOUSE   | Guanine nucleotide-binding protein G(I)/G(S)/G(T) subunit beta-1; | 1.42  | 0.0541 |
| NUCB2_MOUSE  | Nucleobindin-2;                                                   | 3.32  | 0.0542 |
| SBP1_MOUSE   | Selenium-binding protein 1                                        | -0.72 | 0.0544 |
| LIMD1_MOUSE  | LIM domain-containing protein 1;                                  | 3.58  | 0.0545 |
| B2RXT3_MOUSE | RAD23a homolog (S. cerevisiae), isoform CRA_b;                    | -1.49 | 0.0553 |
| CLIC1_MOUSE  | Chloride intracellular channel protein 1;                         | 1.36  | 0.0555 |
| K0090_MOUSE  | Uncharacterized protein KIAA0090;                                 | 3.58  | 0.0556 |
| RAC1_MOUSE   | Ras-related C3 botulinum toxin substrate 1;                       | 3.58  | 0.0556 |
| NFU1_MOUSE   | NFU1 iron-sulfur cluster scaffold homolog, mitochondrial;         | 3.32  | 0.0559 |
| IMPA1_MOUSE  | Inositol monophosphatase 1;                                       | 2.58  | 0.0563 |
| MURC_MOUSE   | Muscle-related coiled-coil protein;                               | -1.42 | 0.0563 |
| PALLD_MOUSE  | Palladin;                                                         | 3.00  | 0.0568 |
| PUR8_MOUSE   | Adenylosuccinate lyase;                                           | 0.76  | 0.0572 |
| Q8BRB8_MOUSE | Putative uncharacterized protein;                                 | 0.70  | 0.0576 |
| LPP_MOUSE    | Lipoma-preferred partner homolog;                                 | 1.26  | 0.0579 |
| ITAV_MOUSE   | Integrin alpha-V;                                                 | 1.58  | 0.0581 |
| CALU_MOUSE   | Calumenin;                                                        | 1.85  | 0.0582 |
| DPYL2_MOUSE  | Dihydropyrimidinase-related protein 2;                            | 0.34  | 0.0586 |
| ETFB_MOUSE   | Electron transfer flavoprotein subunit beta;                      | -0.62 | 0.0586 |
| ASPC1_MOUSE  | Tether containing UBX domain for GLUT4;                           | 3.00  | 0.0587 |
| TBB3_MOUSE   | Tubulin beta-3 chain;                                             | 3.32  | 0.0593 |
| ECH1_MOUSE   | Delta(3,5)-Delta(2,4)-dienoyl-CoA isomerase, mitochondrial;       | -0.99 | 0.0594 |
| ACADS_MOUSE  | Short-chain specific acyl-CoA dehydrogenase, mitochondrial;       | -0.79 | 0.0595 |
| Q8BP96_MOUSE | Putative uncharacterized protein;                                 | 2.58  | 0.061  |

|              |                                                                       |       |        |
|--------------|-----------------------------------------------------------------------|-------|--------|
| CCD66_MOUSE  | Coiled-coil domain-containing protein 66;                             | -2.22 | 0.0626 |
| H2B1B_MOUSE  | Histone H2B type 1-B;                                                 | 0.75  | 0.0626 |
| MMSA_MOUSE   | Methylmalonate-semialdehyde dehydrogenase [acylating], mitochondrial; | -0.48 | 0.0628 |
| PARK7_MOUSE  | Protein DJ-1;                                                         | -0.09 | 0.063  |
| Q6A0B1_MOUSE | MKIAA0177 protein;                                                    | 3.32  | 0.0635 |
| PYRG1_MOUSE  | CTP synthase 1;                                                       | 3.00  | 0.0642 |
| H2B1A_MOUSE  | Histone H2B type 1-A;                                                 | 2.58  | 0.0643 |
| ICAL_MOUSE   | Calpastatin;                                                          | 0.75  | 0.065  |
| SERA_MOUSE   | D-3-phosphoglycerate dehydrogenase;                                   | 3.32  | 0.0652 |
| CCD58_MOUSE  | Coiled-coil domain-containing protein 58;                             | -1.18 | 0.0653 |
| SORCN_MOUSE  | Sorcin;                                                               | 1.74  | 0.0653 |
| RL4_MOUSE    | 60S ribosomal protein L4;                                             | 0.86  | 0.0655 |
| FMO2_MOUSE   | Dimethylaniline monooxygenase [N-oxide-forming] 2;                    | 3.81  | 0.0657 |
| VPS35_MOUSE  | Vacuolar protein sorting-associated protein 35;                       | 1.39  | 0.066  |
| NUDT7_MOUSE  | Peroxisomal coenzyme A diphosphatase NUDT7;                           | 2.81  | 0.0665 |
| CC058_MOUSE  | UPF0672 protein C3orf58 homolog;                                      | 3.00  | 0.0667 |
| DNJB2_MOUSE  | DnaJ homolog subfamily B member 2;                                    | -1.38 | 0.067  |
| ACDSB_MOUSE  | Short/branched chain specific acyl-CoA dehydrogenase, mitochondrial;  | -1.29 | 0.0675 |
| IF5A1_MOUSE  | Eukaryotic translation initiation factor 5A-1;                        | -0.56 | 0.0675 |
| LTBP4_MOUSE  | Latent-transforming growth factor beta-binding protein 4;             | 3.58  | 0.0676 |
| MUTA_MOUSE   | Methylmalonyl-CoA mutase, mitochondrial;                              | -1.50 | 0.0678 |
| Q3TS19_MOUSE | Car1 protein;                                                         | 2.12  | 0.068  |
| ALBU_MOUSE   | Serum albumin;                                                        | 0.37  | 0.0683 |
| GBB2_MOUSE   | Guanine nucleotide-binding protein G(I)/G(S)/G(T) subunit beta-2;     | 1.96  | 0.0683 |
| YBOX1_MOUSE  | Nuclease-sensitive element-binding protein 1;                         | 1.72  | 0.0683 |
| ESYT1_MOUSE  | Extended synaptotagmin-1;                                             | 2.81  | 0.0686 |
| CAPR1_MOUSE  | Caprin-1;                                                             | -3.81 | 0.0693 |
| AAK1_MOUSE   | AP2-associated protein kinase 1;                                      | -2.00 | 0.0698 |
| SAA4_MOUSE   | Serum amyloid A-4 protein;                                            | -3.00 | 0.07   |
| RD23B_MOUSE  | UV excision repair protein RAD23 homolog B;                           | 0.75  | 0.0702 |
| ADCK3_MOUSE  | Chaperone activity of bc1 complex-like, mitochondrial;                | -1.16 | 0.0703 |
| RS30_MOUSE   | 40S ribosomal protein S30;                                            | 3.32  | 0.0705 |
| A1AG1_MOUSE  | Alpha-1-acid glycoprotein 1;                                          | 1.17  | 0.0711 |
| AS3MT_MOUSE  | Arsenite methyltransferase;                                           | -3.32 | 0.0712 |
| APOA1_MOUSE  | Apolipoprotein A-I;                                                   | -0.77 | 0.0713 |
| KV2A7_MOUSE  | Ig kappa chain V-II region 26-10;                                     | 3.58  | 0.0713 |
| COPZ2_MOUSE  | Coatomer subunit zeta-2;                                              | 3.58  | 0.0715 |
| GLNA_MOUSE   | Glutamine synthetase;                                                 | 1.15  | 0.0717 |
| DHSO_MOUSE   | Sorbitol dehydrogenase;                                               | -1.22 | 0.0718 |
| HS71L_MOUSE  | Heat shock 70 kDa protein 1-like;                                     | 4.00  | 0.0719 |
| CAP2_MOUSE   | Adenylyl cyclase-associated protein 2;                                | 2.09  | 0.0721 |
| CALM_MOUSE   | Calmodulin;                                                           | 0.70  | 0.0723 |
| Q91VA7_MOUSE | Isocitrate dehydrogenase 3 (NAD+) beta;                               | -0.73 | 0.0724 |
| Q3TZT4_MOUSE | Putative uncharacterized protein;                                     | 3.32  | 0.073  |
| MGLL_MOUSE   | Monoglyceride lipase;                                                 | -2.58 | 0.0734 |
| A2AQ53_MOUSE | Fibrillin 1;                                                          | 1.54  | 0.0741 |
| NDUV1_MOUSE  | NADH dehydrogenase [ubiquinone] flavoprotein 1, mitochondrial;        | -0.66 | 0.0742 |
| NAA25_MOUSE  | N-alpha-acetyltransferase 25, NatB auxiliary subunit;                 | 3.00  | 0.0746 |



|              |                                                                          |       |        |
|--------------|--------------------------------------------------------------------------|-------|--------|
| HSP7C_MOUSE  | Heat shock cognate 71 kDa protein;                                       | 0.24  | 0.0749 |
| ATLA3_MOUSE  | Atlastin-3;                                                              | 3.00  | 0.0753 |
| PURA_MOUSE   | Transcriptional activator protein Pur-alpha;                             | 0.63  | 0.0756 |
| STRN3_MOUSE  | Striatin-3;                                                              | 3.58  | 0.0756 |
| IF4H_MOUSE   | Eukaryotic translation initiation factor 4H;                             | 0.46  | 0.0766 |
| HA10_MOUSE   | H-2 class I histocompatibility antigen, Q10 alpha chain;                 | -3.00 | 0.0767 |
| PFD2_MOUSE   | Prefoldin subunit 3;                                                     | -3.00 | 0.0767 |
| PPA6_MOUSE   | Lysosomal protective protein;                                            | -0.97 | 0.0767 |
| RMD1_MOUSE   | Regulator of microtubule dynamics protein 1;                             | -3.25 | 0.0769 |
| VWF_MOUSE    | von Willebrand factor;                                                   | 1.72  | 0.0773 |
| OSBL1_MOUSE  | Oxysterol-binding protein-related protein 1;                             | 3.32  | 0.0774 |
| LDHA_MOUSE   | L-lactate dehydrogenase A chain;                                         | -0.47 | 0.0778 |
| MA2B1_MOUSE  | Lysosomal alpha-mannosidase;                                             | -3.00 | 0.0778 |
| ETFD_MOUSE   | Electron transfer flavoprotein-ubiquinone oxidoreductase, mitochondrial; | -0.60 | 0.0782 |
| HNRH2_MOUSE  | Heterogeneous nuclear ribonucleoprotein H2;                              | -3.81 | 0.0782 |
| SAMH1_MOUSE  | SAM domain and HD domain-containing protein 1;                           | -3.00 | 0.0783 |
| COX5B_MOUSE  | Cytochrome c oxidase subunit 5B, mitochondrial;                          | 0.81  | 0.0787 |
| PGP_MOUSE    | Membrane-associated progesterone receptor component 1;                   | -1.08 | 0.0787 |
| ACOT3_MOUSE  | Acyl-coenzyme A thioesterase 3;                                          | -4.00 | 0.079  |
| RL15_MOUSE   | 60S ribosomal protein L15;                                               | 1.19  | 0.0792 |
| VAMP3_MOUSE  | Vesicle-associated membrane protein 3;                                   | 1.81  | 0.0792 |
| EPN4_MOUSE   | Clathrin interactor 1;                                                   | 3.58  | 0.0802 |
| FKBP7_MOUSE  | Peptidyl-prolyl cis-trans isomerase FKBP7;                               | 3.58  | 0.0802 |
| LAC2_MOUSE   | Ig lambda-2 chain C region                                               | 3.00  | 0.0803 |
| RL5_MOUSE    | 60S ribosomal protein L5;                                                | 1.47  | 0.0803 |
| CHLE_MOUSE   | Cholinesterase;                                                          | 3.00  | 0.0804 |
| TWSG1_MOUSE  | Twisted gastrulation protein homolog 1;                                  | 3.00  | 0.0804 |
| NDUS2_MOUSE  | NADH dehydrogenase [ubiquinone] iron-sulfur protein 2, mitochondrial;    | -0.63 | 0.0808 |
| AP4A_MOUSE   | Bis(5'-nucleosyl)-tetraphosphatase [asymmetrical];                       | -3.81 | 0.0811 |
| TENC1_MOUSE  | Tensin-like C1 domain-containing phosphatase;                            | 3.81  | 0.0815 |
| RL12_MOUSE   | 60S ribosomal protein L12;                                               | 0.77  | 0.0819 |
| TRBM_MOUSE   | Thrombomodulin;                                                          | 3.00  | 0.0819 |
| METK2_MOUSE  | S-adenosylmethionine synthase isoform type-2;                            | 3.00  | 0.082  |
| CATB_MOUSE   | Cathepsin B;                                                             | 1.13  | 0.0821 |
| DYHC1_MOUSE  | Cytoplasmic dynein 1 heavy chain 1;                                      | 0.64  | 0.0823 |
| LNP_MOUSE    | Protein lunapark;                                                        | 2.12  | 0.0824 |
| RL23_MOUSE   | 60S ribosomal protein L23;                                               | 0.76  | 0.0824 |
| K2C5_MOUSE   | Keratin, type II cytoskeletal 5;                                         | -2.32 | 0.0826 |
| CALL3_MOUSE  | Calmodulin-like protein 3;                                               | 3.32  | 0.0829 |
| Q5BL10_MOUSE | Kinesin family member 5B;                                                | 3.32  | 0.0829 |
| OXND1_MOUSE  | Oxidoreductase NAD-binding domain-containing protein 1;                  | -1.74 | 0.0831 |
| ARMC1_MOUSE  | Armadillo repeat-containing protein 1;                                   | -2.46 | 0.0834 |
| Q9ES94_MOUSE | Cathepsin Z;                                                             | 2.91  | 0.0837 |
| SYCM_MOUSE   | Probable cysteinyl-tRNA synthetase, mitochondrial;                       | -3.58 | 0.0839 |
| Q5FW75_MOUSE | Actinin alpha 2;                                                         | 2.70  | 0.0847 |
| K113A_MOUSE  | Kinesin-like protein KIF13A;                                             | -3.00 | 0.0848 |
| CUL1_MOUSE   | Cullin-1;                                                                | 2.58  | 0.0851 |
| GABT_MOUSE   | 4-aminobutyrate aminotransferase, mitochondrial;                         | 3.00  | 0.0853 |

|              |                                                                   |       |        |
|--------------|-------------------------------------------------------------------|-------|--------|
| F120A_MOUSE  | Constitutive coactivator of PPAR-gamma-like protein 1;            | 2.81  | 0.0855 |
| Q5EBQ0_MOUSE | Putative uncharacterized protein;                                 | -1.50 | 0.0856 |
| COQ7_MOUSE   | Ubiquinone biosynthesis protein COQ7 homolog;                     | -2.12 | 0.086  |
| HSP74_MOUSE  | Heat shock 70 kDa protein 4;                                      | 0.66  | 0.0863 |
| CSN3_MOUSE   | COP9 signalosome complex subunit 3;                               | 1.58  | 0.0867 |
| TOM40_MOUSE  | Mitochondrial import receptor subunit TOM40 homolog;              | -3.32 | 0.0867 |
| A1BG_MOUSE   | Alpha-1B-glycoprotein;                                            | 2.58  | 0.0869 |
| CATA_MOUSE   | Catalase;                                                         | 0.51  | 0.0875 |
| LAMA4_MOUSE  | Laminin subunit alpha-4;                                          | -3.00 | 0.0875 |
| B9EIE8_MOUSE | Ubiquitin A-52 residue ribosomal protein fusion product 1;        | -1.22 | 0.0877 |
| Q3TCR9_MOUSE | Putative uncharacterized protein;                                 | 3.00  | 0.0877 |
| TERA_MOUSE   | Transitional endoplasmic reticulum ATPase;                        | 0.50  | 0.0877 |
| QCR1_MOUSE   | Cytochrome b-c1 complex subunit 1, mitochondrial;                 | -0.65 | 0.0881 |
| ENTP2_MOUSE  | Ectonucleoside triphosphate diphosphohydrolase 2;                 | 1.81  | 0.0882 |
| EFTU_MOUSE   | Elongation factor Tu, mitochondrial;                              | -0.54 | 0.0885 |
| EFTS_MOUSE   | Elongation factor Ts, mitochondrial;                              | -1.29 | 0.0894 |
| ITPA_MOUSE   | Inosine triphosphate pyrophosphatase;                             | 1.06  | 0.0894 |
| ABCE1_MOUSE  | ATP-binding cassette sub-family E member 1;                       | 1.00  | 0.0897 |
| TIM9_MOUSE   | Mitochondrial import inner membrane translocase subunit Tim9;     | -1.70 | 0.0897 |
| COF2_MOUSE   | Cofilin-2;                                                        | 0.33  | 0.09   |
| B2RUF0_MOUSE | Spectrin beta 1;                                                  | -3.00 | 0.0902 |
| Q8BRA9_MOUSE | Putative uncharacterized protein;                                 | -1.85 | 0.0903 |
| A6H663_MOUSE | BCL2-associated athanogene 3;                                     | 1.46  | 0.0905 |
| COBL1_MOUSE  | Cordon-bleu protein-like 1;                                       | -4.32 | 0.0905 |
| APEH_MOUSE   | Acylamino-acid-releasing enzyme;                                  | -1.85 | 0.0907 |
| Q9ERN6_MOUSE | Cardiac Ca2+ release channel;                                     | 0.90  | 0.0908 |
| TOM70_MOUSE  | Mitochondrial import receptor subunit TOM70;                      | 1.46  | 0.0912 |
| ECHD1_MOUSE  | Enoyl-CoA hydratase domain-containing protein 1;                  | -3.00 | 0.0915 |
| ANK1_MOUSE   | Ankyrin-1;                                                        | 0.97  | 0.0921 |
| SPB6_MOUSE   | Serpin B6                                                         | 0.78  | 0.0924 |
| HCD2_MOUSE   | 3-hydroxyacyl-CoA dehydrogenase type-2;                           | -0.93 | 0.0929 |
| NEDD4_MOUSE  | E3 ubiquitin-protein ligase NEDD4;                                | 1.35  | 0.0929 |
| FKB1A_MOUSE  | Peptidyl-prolyl cis-trans isomerase FKBP1A;                       | -1.62 | 0.093  |
| RANG_MOUSE   | Ran-specific GTPase-activating protein;                           | 1.58  | 0.093  |
| SNAA_MOUSE   | Alpha-soluble NSF attachment protein;                             | 0.85  | 0.0932 |
| WIPI1_MOUSE  | WD repeat domain phosphoinositide-interacting protein 1;          | 3.32  | 0.0933 |
| TR112_MOUSE  | tRNA methyltransferase 112 homolog;                               | -3.00 | 0.0936 |
| TXLNB_MOUSE  | Beta-taxilin;                                                     | -1.00 | 0.0937 |
| ALDH2_MOUSE  | Aldehyde dehydrogenase, mitochondrial;                            | -0.50 | 0.0941 |
| Q3UPQ6_MOUSE | Putative uncharacterized protein;                                 | -2.00 | 0.0947 |
| K1C10_MOUSE  | Keratin, type I cytoskeletal 10;                                  | -3.58 | 0.0948 |
| A2M_MOUSE    | Alpha-2-macroglobulin;                                            | -0.28 | 0.0958 |
| HS90A_MOUSE  | Heat shock protein HSP 90-alpha;                                  | 1.12  | 0.0959 |
| CAP1_MOUSE   | Adenylyl cyclase-associated protein 1;                            | 1.04  | 0.0963 |
| ENPP1_MOUSE  | Ectonucleotide pyrophosphatase/phosphodiesterase family member 1; | 3.32  | 0.0964 |
| BLMH_MOUSE   | Bleomycin hydrolase;                                              | 2.81  | 0.0966 |
| RRAS2_MOUSE  | Ras-related protein R-Ras2;                                       | 1.36  | 0.0966 |
| CSPG4_MOUSE  | Chondroitin sulfate proteoglycan 4;                               | 3.00  | 0.0968 |

|              |                                                                      |       |        |
|--------------|----------------------------------------------------------------------|-------|--------|
| SYNE2_MOUSE  | Nesprin-2;                                                           | 3.00  | 0.0968 |
| Q8C6A3_MOUSE | Putative uncharacterized protein;                                    | 0.86  | 0.0971 |
| HS105_MOUSE  | Heat shock protein 105 kDa;                                          | 1.32  | 0.0972 |
| PDPR_MOUSE   | Pyridoxal-dependent decarboxylase domain-containing protein 1;       | -3.00 | 0.0972 |
| DNJA1_MOUSE  | DnaJ homolog subfamily A member 1;                                   | 3.00  | 0.0974 |
| Q5R3T5_MOUSE | G8(Anti-MRBC hybridoma) light chain;                                 | 3.00  | 0.0974 |
| RL27_MOUSE   | 60S ribosomal protein L27;                                           | 3.32  | 0.0976 |
| CLIP2_MOUSE  | CAP-Gly domain-containing linker protein 2;                          | 3.32  | 0.0979 |
| BPNT1_MOUSE  | 3'(2'),5'-bisphosphate nucleotidase 1;                               | 1.58  | 0.0981 |
| RL8_MOUSE    | 60S ribosomal protein L8;                                            | 1.00  | 0.0986 |
| NLTP_MOUSE   | Non-specific lipid-transfer protein;                                 | -1.05 | 0.0998 |
| 1433E_MOUSE  | 14-3-3 protein epsilon;                                              | 0.49  | 0.1001 |
| HEM3_MOUSE   | Porphobilinogen deaminase;                                           | -1.81 | 0.1003 |
| LGUL_MOUSE   | Lactoylglutathione lyase;                                            | 0.40  | 0.1005 |
| Q3TT79_MOUSE | Putative uncharacterized protein;                                    | 1.58  | 0.1005 |
| CSN7A_MOUSE  | COP9 signalosome complex subunit 7a;                                 | -3.00 | 0.1009 |
| CF115_MOUSE  | UPF0727 protein C6orf115 homolog;                                    | -3.32 | 0.1011 |
| K2C8_MOUSE   | Keratin, type II cytoskeletal 8;                                     | -2.22 | 0.1011 |
| TPM2_MOUSE   | Tropomyosin beta chain;                                              | 3.32  | 0.1012 |
| NEDD8_MOUSE  | NEDD8;                                                               | -4.39 | 0.1016 |
| CHM4B_MOUSE  | Charged multivesicular body protein 4b;                              | -2.58 | 0.1019 |
| DNJB4_MOUSE  | DnaJ homolog subfamily B member 4;                                   | 0.63  | 0.1019 |
| Q7TMF4_MOUSE | Propionyl Coenzyme A carboxylase, beta polypeptide;                  | -3.00 | 0.1019 |
| AGFG1_MOUSE  | Arf-GAP domain and FG repeats-containing protein 1;                  | 3.32  | 0.102  |
| VAPA_MOUSE   | Vesicle-associated membrane protein-associated protein A;            | 1.70  | 0.102  |
| AKAP1_MOUSE  | A-kinase anchor protein 1, mitochondrial;                            | -3.32 | 0.1029 |
| CNDP2_MOUSE  | Cytosolic non-specific dipeptidase;                                  | -1.16 | 0.1031 |
| SPS1_MOUSE   | Selenide, water dikinase 1;                                          | -2.46 | 0.1031 |
| RS5_MOUSE    | 40S ribosomal protein S5;                                            | 3.58  | 0.1033 |
| EZRI_MOUSE   | Ezrin;                                                               | -0.79 | 0.1034 |
| GDPD1_MOUSE  | Glycerophosphodiester phosphodiesterase domain-containing protein 1; | -3.00 | 0.1034 |
| WFS1_MOUSE   | Wolframin;                                                           | 1.32  | 0.1035 |
| B1B0P8_MOUSE | LOC633594 protein;                                                   | 0.74  | 0.1036 |
| CDC37_MOUSE  | Hsp90 co-chaperone Cdc37;                                            | 1.19  | 0.1036 |
| SDSL_MOUSE   | Serine dehydratase-like;                                             | -3.58 | 0.1038 |
| LDHB_MOUSE   | L-lactate dehydrogenase B chain;                                     | -0.46 | 0.1041 |
| PSB1_MOUSE   | Proteasome subunit beta type-1;                                      | -1.09 | 0.1047 |
| ACTB_MOUSE   | Actin, cytoplasmic 1;                                                | 0.64  | 0.1049 |
| TBA1B_MOUSE  | Tubulin alpha-1B chain;                                              | 0.62  | 0.105  |
| DPY30_MOUSE  | Protein dpy-30 homolog;                                              | -1.89 | 0.1055 |
| Q3UZK5_MOUSE | Putative uncharacterized protein;                                    | -2.00 | 0.1056 |
| LRC59_MOUSE  | Leucine-rich repeat-containing protein 59;                           | 1.77  | 0.1057 |
| MCEE_MOUSE   | Methylmalonyl-CoA epimerase, mitochondrial;                          | -1.42 | 0.1059 |
| MCFD2_MOUSE  | Multiple coagulation factor deficiency protein 2 homolog;            | 3.32  | 0.1063 |
| K6PF_MOUSE   | 6-phosphofructokinase, muscle type;                                  | -0.49 | 0.1075 |
| HA1L_MOUSE   | H-2 class I histocompatibility antigen, L-D alpha chain;             | 2.58  | 0.1076 |
| TRI47_MOUSE  | Tripartite motif-containing protein 47;                              | 3.00  | 0.1077 |
| FBLI1_MOUSE  | Filamin-binding LIM protein 1;                                       | -3.00 | 0.1084 |

|              |                                                              |       |        |
|--------------|--------------------------------------------------------------|-------|--------|
| IPO7_MOUSE   | Importin-7;                                                  | 2.32  | 0.1085 |
| QCR8_MOUSE   | Cytochrome b-c1 complex subunit 8;                           | -1.09 | 0.1087 |
| MAP1A_MOUSE  | Microtubule-associated protein 1A;                           | 3.00  | 0.109  |
| Q80X87_MOUSE | Glia maturation factor, beta;                                | -1.22 | 0.109  |
| PRDX3_MOUSE  | Peroxiredoxin-5, mitochondrial;                              | -0.75 | 0.1096 |
| RRBP1_MOUSE  | Ribosome-binding protein 1;                                  | 1.50  | 0.11   |
| RB11A_MOUSE  | Ras-related protein Rab-11A;                                 | -1.68 | 0.1101 |
| LICH_MOUSE   | Lysosomal acid lipase/cholesteryl ester hydrolase;           | 3.00  | 0.1104 |
| B2RXS4_MOUSE | Ogdhl protein;                                               | 2.22  | 0.1106 |
| PLIN2_MOUSE  | Perilipin-4;                                                 | -2.81 | 0.1116 |
| B2RQL6_MOUSE | Y box protein 2;                                             | -0.61 | 0.1121 |
| A2AP24_MOUSE | OTU domain containing 6B;                                    | 1.81  | 0.1123 |
| CAH1_MOUSE   | Carbonic anhydrase 1;                                        | -0.60 | 0.1125 |
| PSA3_MOUSE   | Proteasome subunit alpha type-3;                             | 1.00  | 0.1129 |
| ODPX_MOUSE   | Pyruvate dehydrogenase protein X component, mitochondrial;   | 0.50  | 0.113  |
| GPCP1_MOUSE  | Putative glycerophosphocholine phosphodiesterase GPCPD1;     | -2.32 | 0.1131 |
| CMBL_MOUSE   | Carboxymethylenebutenolidase homolog;                        | -1.46 | 0.1132 |
| SCLY_MOUSE   | Selenocysteine lyase;                                        | -3.00 | 0.1132 |
| THMS2_MOUSE  | Protein THEMIS2;                                             | -3.00 | 0.1132 |
| BMP10_MOUSE  | Bone morphogenetic protein 10;                               | 4.00  | 0.1135 |
| GMPR1_MOUSE  | GMP reductase 1;                                             | 1.58  | 0.1137 |
| PHB_MOUSE    | Prohibitin-2;                                                | 0.93  | 0.1141 |
| A2AGQ1_MOUSE | Myosin binding protein C, cardiac;                           | -0.44 | 0.1142 |
| GSTA4_MOUSE  | Glutathione S-transferase A4;                                | -1.24 | 0.1145 |
| CREG1_MOUSE  | Protein CREG1;                                               | -2.32 | 0.1147 |
| MYH1_MOUSE   | Myosin-1;                                                    | 0.57  | 0.115  |
| SF3B1_MOUSE  | Splicing factor 3B subunit 1;                                | 3.00  | 0.1161 |
| Q91Z25_MOUSE | Arpc1b protein;                                              | 3.32  | 0.1171 |
| FIS1_MOUSE   | Mitochondrial fission 1 protein;                             | 1.14  | 0.1175 |
| FOP_MOUSE    | Friend of PRMT1 protein;                                     | 3.00  | 0.1181 |
| RD23A_MOUSE  | UV excision repair protein RAD23 homolog A;                  | 1.00  | 0.1186 |
| LCLT1_MOUSE  | Lysocardiolipin acyltransferase 1;                           | 1.42  | 0.1189 |
| D2HDH_MOUSE  | D-2-hydroxyglutarate dehydrogenase, mitochondrial;           | -1.27 | 0.12   |
| PEX14_MOUSE  | Peroxisomal biogenesis factor 19;                            | -2.00 | 0.1204 |
| NDUB6_MOUSE  | NADH dehydrogenase [ubiquinone] 1 beta subcomplex subunit 6; | -1.58 | 0.1205 |
| PAIP1_MOUSE  | Polyadenylate-binding protein-interacting protein 1;         | 3.00  | 0.1206 |
| HEBP1_MOUSE  | Heme-binding protein 1;                                      | -1.36 | 0.121  |
| MDHM_MOUSE   | Malate dehydrogenase, mitochondrial;                         | -0.46 | 0.1213 |
| Q8K139_MOUSE | Lecithin cholesterol acyltransferase;                        | -2.32 | 0.1213 |
| UBE2A_MOUSE  | Ubiquitin-conjugating enzyme E2 A;                           | 4.00  | 0.1213 |
| RCAN1_MOUSE  | Calcipressin-1;                                              | 3.00  | 0.1215 |
| IF6_MOUSE    | Eukaryotic translation initiation factor 6;                  | 0.87  | 0.122  |
| PDLI1_MOUSE  | PDZ and LIM domain protein 3;                                | 1.42  | 0.1228 |
| BASP1_MOUSE  | Brain acid soluble protein 1;                                | 3.00  | 0.1233 |
| RS3A_MOUSE   | 40S ribosomal protein S3a;                                   | 0.94  | 0.124  |
| SCPDH_MOUSE  | Probable saccharopine dehydrogenase;                         | 1.12  | 0.1241 |
| HXK1_MOUSE   | Ig heavy chain V region MOPC 104E;                           | 0.76  | 0.1251 |
| CADH7_MOUSE  | Cadherin-7;                                                  | -3.00 | 0.1255 |

|              |                                                                         |       |        |
|--------------|-------------------------------------------------------------------------|-------|--------|
| RNLS_MOUSE   | Renalase;                                                               | -1.00 | 0.1268 |
| SGTA_MOUSE   | Small glutamine-rich tetratricopeptide repeat-containing protein alpha; | -1.58 | 0.1271 |
| XIRP1_MOUSE  | Xin actin-binding repeat-containing protein 1;                          | 0.71  | 0.1273 |
| CADH2_MOUSE  | Cadherin-2;                                                             | 1.28  | 0.1275 |
| UBP47_MOUSE  | Ubiquitin carboxyl-terminal hydrolase 47;                               | 3.00  | 0.1281 |
| Q7TPM8_MOUSE | Tns1 protein;                                                           | 1.46  | 0.1307 |
| ACTBL_MOUSE  | Beta-actin-like protein 2;                                              | 0.68  | 0.1308 |
| DC1L1_MOUSE  | Cytoplasmic dynein 1 light intermediate chain 1;                        | 0.64  | 0.1315 |
| ROCK1_MOUSE  | Rho-associated protein kinase 1;                                        | 2.81  | 0.1318 |
| RS27_MOUSE   | 40S ribosomal protein S27;                                              | -3.58 | 0.1319 |
| FYCO1_MOUSE  | FYVE and coiled-coil domain-containing protein 1;                       | -1.81 | 0.1324 |
| CSAD_MOUSE   | Cysteine sulfinic acid decarboxylase;                                   | 2.00  | 0.1326 |
| PCCA_MOUSE   | Propionyl-CoA carboxylase alpha chain, mitochondrial;                   | -0.56 | 0.1326 |
| EFGM_MOUSE   | Elongation factor G, mitochondrial;                                     | -0.58 | 0.1327 |
| B8JG4_MOUSE  | Complement factor B;                                                    | -2.32 | 0.1329 |
| ACAD9_MOUSE  | Acyl-CoA dehydrogenase family member 9, mitochondrial;                  | -0.91 | 0.1332 |
| Q3TT33_MOUSE | Annexin A7, isoform CRA_c;                                              | 0.95  | 0.1341 |
| KNG1_MOUSE   | Kininogen-1;                                                            | 0.75  | 0.1345 |
| EF1D_MOUSE   | Elongation factor 1-delta;                                              | -1.00 | 0.1355 |
| PLST_MOUSE   | Nicotinate phosphoribosyltransferase;                                   | 1.58  | 0.1362 |
| ACPM_MOUSE   | Acyl carrier protein, mitochondrial;                                    | -0.51 | 0.1363 |
| CMYA5_MOUSE  | Cardiomyopathy-associated protein 5;                                    | 1.50  | 0.1366 |
| PPIB_MOUSE   | Peptidyl-prolyl cis-trans isomerase F, mitochondrial;                   | 1.36  | 0.1372 |
| GATB_MOUSE   | Probable glutamyl-tRNA(Gln) amidotransferase subunit B, mitochondrial;  | -3.00 | 0.1373 |
| K1C19_MOUSE  | Keratin, type I cytoskeletal 19;                                        | -1.81 | 0.1374 |
| HBXIP_MOUSE  | Hepatitis B virus X-interacting protein homolog;                        | 1.17  | 0.1376 |
| L2HDH_MOUSE  | L-2-hydroxyglutarate dehydrogenase, mitochondrial;                      | -3.32 | 0.1376 |
| B0LAC2_MOUSE | Ubiquitin A-52 residue ribosomal protein fusion product 1;              | 1.58  | 0.1377 |
| HNRPL_MOUSE  | Heterogeneous nuclear ribonucleoprotein L;                              | -1.64 | 0.1383 |
| IF4A3_MOUSE  | Eukaryotic initiation factor 4A-III;                                    | 2.58  | 0.1384 |
| A2AP_MOUSE   | Alpha-2-antiplasmin;                                                    | 2.81  | 0.1387 |
| VTNC_MOUSE   | Vitronectin;                                                            | 0.95  | 0.1388 |
| CSN6_MOUSE   | COP9 signalosome complex subunit 6;                                     | 2.00  | 0.1393 |
| TNNT2_MOUSE  | Troponin T, cardiac muscle;                                             | -0.45 | 0.1393 |
| AL7A1_MOUSE  | Alpha-aminoadipic semialdehyde dehydrogenase;                           | 1.09  | 0.1394 |
| Q3TWT2_MOUSE | Putative uncharacterized protein;                                       | 1.74  | 0.1399 |
| MK03_MOUSE   | Mitogen-activated protein kinase 3;                                     | 2.17  | 0.141  |
| ILF3_MOUSE   | Interleukin enhancer-binding factor 3;                                  | 3.00  | 0.1411 |
| SPRC_MOUSE   | SPARC;                                                                  | 3.00  | 0.1411 |
| STXB1_MOUSE  | Syntaxin-binding protein 1;                                             | 3.32  | 0.1417 |
| BRE_MOUSE    | BRCA1-A complex subunit BRE;                                            | -3.00 | 0.1418 |
| ENTP1_MOUSE  | Ectonucleoside triphosphate diphosphohydrolase 1;                       | 3.00  | 0.1419 |
| CA198_MOUSE  | Uncharacterized protein C1orf198 homolog;                               | 3.00  | 0.1426 |
| A1L3P4_MOUSE | Sodium/hydrogen exchanger;                                              | -3.00 | 0.143  |
| PLIN4_MOUSE  | Plasminogen;                                                            | 0.89  | 0.1431 |
| THIKA_MOUSE  | 3-ketoacyl-CoA thiolase A, peroxisomal;                                 | -0.58 | 0.1431 |
| FUBP1_MOUSE  | Far upstream element-binding protein 1;                                 | 1.58  | 0.1434 |
| LBH_MOUSE    | Protein LBH;                                                            | -1.49 | 0.1434 |

|              |                                                            |       |        |
|--------------|------------------------------------------------------------|-------|--------|
| EMAL2_MOUSE  | Echinoderm microtubule-associated protein-like 2;          | 1.44  | 0.1453 |
| GBP2_MOUSE   | Interferon-induced guanylate-binding protein 2;            | 2.32  | 0.1456 |
| AHSA1_MOUSE  | Activator of 90 kDa heat shock protein ATPase homolog 1;   | -1.32 | 0.1461 |
| ERP29_MOUSE  | Endoplasmic reticulum resident protein 29;                 | 2.00  | 0.1461 |
| IDE_MOUSE    | Insulin-degrading enzyme;                                  | -2.32 | 0.1466 |
| ARF1_MOUSE   | ADP-ribosylation factor 1;                                 | 0.56  | 0.1477 |
| CBR2_MOUSE   | Carbonyl reductase [NADPH] 2;                              | -1.25 | 0.1482 |
| CA123_MOUSE  | UPF0587 protein C1orf123 homolog;                          | 1.26  | 0.1486 |
| NICA_MOUSE   | Nicastrin;                                                 | 3.00  | 0.1486 |
| D3D2_MOUSE   | 3,2-trans-enoyl-CoA isomerase, mitochondrial;              | -0.39 | 0.1487 |
| TXD12_MOUSE  | Thioredoxin domain-containing protein 12;                  | 1.70  | 0.1487 |
| S10A6_MOUSE  | Protein S100-A6;                                           | 0.65  | 0.1491 |
| ATAD3_MOUSE  | ATPase family AAA domain-containing protein 3;             | 1.32  | 0.1492 |
| SCRN1_MOUSE  | Secernin-1;                                                | 3.00  | 0.1493 |
| MYH14_MOUSE  | Myosin-14;                                                 | 3.32  | 0.1495 |
| HSDL2_MOUSE  | Hydroxysteroid dehydrogenase-like protein 2;               | -1.06 | 0.1499 |
| VPS45_MOUSE  | Vacuolar protein sorting-associated protein 45;            | 3.32  | 0.1502 |
| TM143_MOUSE  | Transmembrane protein 143;                                 | -3.00 | 0.1503 |
| IGBP1_MOUSE  | Immunoglobulin-binding protein 1;                          | 2.32  | 0.1505 |
| VINC_MOUSE   | Vinculin;                                                  | 0.39  | 0.1505 |
| ABCB8_MOUSE  | ATP-binding cassette sub-family B member 8, mitochondrial; | -1.32 | 0.1506 |
| RAN_MOUSE    | GTP-binding nuclear protein Ran;                           | -0.81 | 0.1507 |
| NQO1_MOUSE   | NAD(P)H dehydrogenase [quinone] 1;                         | 1.50  | 0.1515 |
| GLYG_MOUSE   | Glycogenin-1;                                              | 0.76  | 0.1519 |
| GPDA_MOUSE   | Glycerol-3-phosphate dehydrogenase [NAD+], cytoplasmic;    | 0.42  | 0.1521 |
| RS19_MOUSE   | 40S ribosomal protein S19;                                 | 1.81  | 0.1524 |
| YAP1_MOUSE   | Yorkie homolog                                             | 2.17  | 0.1525 |
| MARE3_MOUSE  | Microtubule-associated protein RP/EB family member 3;      | 1.81  | 0.1526 |
| Q3UC49_MOUSE | Ferrochelatase;                                            | -2.32 | 0.1534 |
| RRAS_MOUSE   | Ras-related protein R-Ras;                                 | 1.81  | 0.1537 |
| RLA1_MOUSE   | 60S acidic ribosomal protein P1;                           | 0.88  | 0.154  |
| SHLB2_MOUSE  | Endophilin-B2;                                             | 0.65  | 0.1541 |
| SEPT8_MOUSE  | Septin-8;                                                  | 2.58  | 0.1542 |
| PNPO_MOUSE   | Serum paraoxonase/lactonase 3;                             | 3.00  | 0.1547 |
| NTF2_MOUSE   | Nuclear transport factor 2;                                | 0.69  | 0.1555 |
| HSPB2_MOUSE  | Heat shock protein beta-2;                                 | 0.67  | 0.1557 |
| HYOU1_MOUSE  | Epoxide hydrolase 2;                                       | 1.68  | 0.1557 |
| PRS6B_MOUSE  | 26S protease regulatory subunit 8;                         | 0.92  | 0.1558 |
| Q91XF8_MOUSE | Apolipoprotein A-IV;                                       | -2.00 | 0.156  |
| RS18_MOUSE   | 40S ribosomal protein S18;                                 | -1.58 | 0.156  |
| TBCEL_MOUSE  | Tubulin-specific chaperone cofactor E-like protein;        | 2.00  | 0.157  |
| CLAP1_MOUSE  | CLIP-associating protein 1;                                | 2.81  | 0.1579 |
| Q91V55_MOUSE | Putative uncharacterized protein;                          | 1.00  | 0.1583 |
| ARPC2_MOUSE  | Actin-related protein 2/3 complex subunit 2;               | -2.58 | 0.1596 |
| PGK1_MOUSE   | Phosphoglycerate kinase 2;                                 | 0.22  | 0.1605 |
| STAB1_MOUSE  | Stabilin-1;                                                | 2.32  | 0.1605 |
| PRDX6_MOUSE  | Presequence protease, mitochondrial;                       | -0.66 | 0.1608 |
| ATPA_MOUSE   | ATP synthase subunit alpha, mitochondrial;                 | -0.18 | 0.1609 |

|              |                                                                           |       |        |
|--------------|---------------------------------------------------------------------------|-------|--------|
| DHSA_MOUSE   | Succinate dehydrogenase [ubiquinone] flavoprotein subunit, mitochondrial; | -0.65 | 0.1613 |
| FADD_MOUSE   | Protein FADD;                                                             | -1.14 | 0.1615 |
| LMAN2_MOUSE  | Vesicular integral-membrane protein VIP36;                                | 1.87  | 0.1617 |
| GOGA2_MOUSE  | Golgin subfamily A member 2;                                              | 1.22  | 0.1618 |
| SND1_MOUSE   | Staphylococcal nuclease domain-containing protein 1;                      | 1.49  | 0.162  |
| COX7R_MOUSE  | Cytochrome c oxidase subunit 7A-related protein, mitochondrial;           | 2.32  | 0.1628 |
| SYTM_MOUSE   | Threonyl-tRNA synthetase, mitochondrial;                                  | -3.00 | 0.1629 |
| DNJC8_MOUSE  | DnaJ homolog subfamily C member 8;                                        | -2.00 | 0.1631 |
| DLRB1_MOUSE  | Dynein light chain roadblock-type 1;                                      | 1.17  | 0.1632 |
| PACN3_MOUSE  | Protein kinase C and casein kinase II substrate protein 3;                | 1.00  | 0.1635 |
| AIFM1_MOUSE  | Apoptosis-inducing factor 1, mitochondrial;                               | -0.58 | 0.1638 |
| VLDLR_MOUSE  | Very low-density lipoprotein receptor;                                    | 2.00  | 0.164  |
| HSP72_MOUSE  | Heat shock-related 70 kDa protein 2;                                      | 0.20  | 0.1643 |
| KAP0_MOUSE   | cAMP-dependent protein kinase type I-alpha regulatory subunit;            | 0.55  | 0.1648 |
| ISOC1_MOUSE  | Isochorismatase domain-containing protein 1;                              | -2.81 | 0.1649 |
| A0JLW6_MOUSE | Prodh protein;                                                            | -2.00 | 0.1651 |
| CYB5_MOUSE   | Cytochrome b5;                                                            | -1.12 | 0.1654 |
| TTL12_MOUSE  | Tubulin-tyrosine ligase-like protein 12;                                  | 2.46  | 0.1656 |
| Q3UMP2_MOUSE | Putative uncharacterized protein;                                         | 2.00  | 0.1658 |
| SQSTM_MOUSE  | Sequestosome-1;                                                           | 3.00  | 0.1658 |
| HYES_MOUSE   | Epoxide hydrolase 1;                                                      | 0.26  | 0.1659 |
| ADH1_MOUSE   | Alcohol dehydrogenase 1;                                                  | -1.70 | 0.167  |
| CLIC4_MOUSE  | Chloride intracellular channel protein 4;                                 | 0.51  | 0.1675 |
| MLRA_MOUSE   | Myosin regulatory light chain 2, atrial isoform;                          | 2.17  | 0.1675 |
| GLU2B_MOUSE  | Glucosidase 2 subunit beta;                                               | 3.81  | 0.1679 |
| MYOM1_MOUSE  | Myomesin-1;                                                               | -0.89 | 0.1679 |
| FAS_MOUSE    | Fatty acid synthase;                                                      | 1.58  | 0.168  |
| TXD17_MOUSE  | Thioredoxin domain-containing protein 17;                                 | 3.00  | 0.168  |
| AUHM_MOUSE   | Methylglutaconyl-CoA hydratase, mitochondrial;                            | -1.12 | 0.1681 |
| FKBP8_MOUSE  | Peptidyl-prolyl cis-trans isomerase FKBP8;                                | 1.00  | 0.1685 |
| ELAV1_MOUSE  | ELAV-like protein 1;                                                      | -1.22 | 0.1692 |
| COPA_MOUSE   | Coatamer subunit alpha;                                                   | 2.81  | 0.1695 |
| AKT1_MOUSE   | RAC-alpha serine/threonine-protein kinase;                                | 2.32  | 0.1696 |
| TITIN_MOUSE  | Titin;                                                                    | 1.22  | 0.1699 |
| GUAD_MOUSE   | Guanine deaminase;                                                        | 1.81  | 0.1705 |
| OPA1_MOUSE   | Dynamin-like 120 kDa protein, mitochondrial;                              | -0.74 | 0.1709 |
| CX7A1_MOUSE  | Cytochrome c oxidase subunit 7A1, mitochondrial;                          | -0.75 | 0.1713 |
| RL11_MOUSE   | 60S ribosomal protein L11;                                                | 1.00  | 0.1715 |
| FGF1_MOUSE   | Heparin-binding growth factor 1;                                          | 1.32  | 0.1716 |
| Q8BVQ9_MOUSE | Putative uncharacterized protein;                                         | 0.86  | 0.1718 |
| CK054_MOUSE  | Ester hydrolase C11orf54 homolog;                                         | 2.58  | 0.1719 |
| DNJA4_MOUSE  | DnaJ homolog subfamily A member 4;                                        | -1.25 | 0.1728 |
| A6ZI46_MOUSE | Fructose-bisphosphate aldolase;                                           | 1.14  | 0.174  |
| SAC1_MOUSE   | Phosphatidylinositide phosphatase SAC1;                                   | 3.58  | 0.1741 |
| ERAP1_MOUSE  | Endoplasmic reticulum aminopeptidase 1;                                   | -3.00 | 0.1756 |
| COX6C_MOUSE  | Cytochrome c oxidase subunit 6C;                                          | -1.00 | 0.1758 |
| AFG32_MOUSE  | AFG3-like protein 2;                                                      | 0.71  | 0.1759 |
| Q6ZWQ9_MOUSE | MCG5400;                                                                  | 4.00  | 0.1761 |

|              |                                                                    |       |        |
|--------------|--------------------------------------------------------------------|-------|--------|
| AT2A1_MOUSE  | Sarcoplasmic/endoplasmic reticulum calcium ATPase 1;               | 0.58  | 0.1763 |
| JPH2_MOUSE   | Junctophilin-2;                                                    | 0.72  | 0.1764 |
| H1BP3_MOUSE  | HCLS1-binding protein 3;                                           | 2.81  | 0.1766 |
| RS15A_MOUSE  | 40S ribosomal protein S15a;                                        | 2.81  | 0.1766 |
| AT1A2_MOUSE  | Sodium/potassium-transporting ATPase subunit alpha-2;              | -0.81 | 0.1784 |
| TLN1_MOUSE   | Talin-1;                                                           | 0.30  | 0.1798 |
| COX5A_MOUSE  | Cytochrome c oxidase subunit 5A, mitochondrial;                    | -0.92 | 0.1803 |
| CA163_MOUSE  | Hcp beta-lactamase-like protein C1orf163 homolog;                  | -2.00 | 0.1806 |
| UBQL4_MOUSE  | Ubiquilin-4;                                                       | 0.11  | 0.1809 |
| CK059_MOUSE  | RhoA activator C11orf59 homolog;                                   | -2.17 | 0.1811 |
| HEM6_MOUSE   | Coproporphyrinogen-III oxidase, mitochondrial;                     | -0.83 | 0.182  |
| PSA7_MOUSE   | Proteasome subunit alpha type-7;                                   | 1.58  | 0.1826 |
| PROF2_MOUSE  | Ribose-phosphate pyrophosphokinase 1;                              | 2.32  | 0.183  |
| PON3_MOUSE   | Serine/threonine-protein phosphatase PP1-alpha catalytic subunit;  | 3.00  | 0.1841 |
| MTNA_MOUSE   | Methylthioribose-1-phosphate isomerase;                            | -1.32 | 0.1862 |
| EGLN_MOUSE   | Endoglin;                                                          | 3.00  | 0.1864 |
| APOA2_MOUSE  | Apolipoprotein A-II;                                               | -0.58 | 0.1865 |
| MOSC2_MOUSE  | MOSC domain-containing protein 2, mitochondrial;                   | 2.00  | 0.1865 |
| LMNA_MOUSE   | Lamin-A/C;                                                         | 2.00  | 0.187  |
| Q3TG68_MOUSE | Putative uncharacterized protein;                                  | -2.00 | 0.187  |
| DAB2_MOUSE   | Disabled homolog 2;                                                | 1.58  | 0.1871 |
| Q3TEL0_MOUSE | Palmitoyl-protein thioesterase 1;                                  | 0.92  | 0.1874 |
| MRC2_MOUSE   | C-type mannose receptor 2;                                         | 1.81  | 0.1875 |
| SIL1_MOUSE   | Nucleotide exchange factor SIL1;                                   | 1.58  | 0.1875 |
| RL31_MOUSE   | 60S ribosomal protein L31;                                         | 1.22  | 0.188  |
| PTGR2_MOUSE  | Prostaglandin reductase 2;                                         | 0.05  | 0.1885 |
| GANAB_MOUSE  | Neutral alpha-glucosidase AB;                                      | 1.42  | 0.189  |
| TM55A_MOUSE  | Transmembrane protein 55A;                                         | 1.42  | 0.1895 |
| PPM1F_MOUSE  | Serine/threonine-protein phosphatase 5;                            | -1.14 | 0.1896 |
| GSTM7_MOUSE  | Glutathione S-transferase Mu 7;                                    | 1.17  | 0.1899 |
| Q3TNR7_MOUSE | Putative uncharacterized protein;                                  | 1.25  | 0.1902 |
| TXND5_MOUSE  | Thioredoxin domain-containing protein 5;                           | 1.25  | 0.1909 |
| A8DUK2_MOUSE | Beta-globin;                                                       | -0.35 | 0.191  |
| COX41_MOUSE  | Cytochrome c oxidase subunit 4 isoform 1, mitochondrial;           | 0.50  | 0.1911 |
| DLG1_MOUSE   | Disks large homolog 1;                                             | 1.81  | 0.1911 |
| GTR4_MOUSE   | Solute carrier family 2, facilitated glucose transporter member 4; | -0.79 | 0.1923 |
| KRT81_MOUSE  | Keratin, type II cuticular Hb1;                                    | -3.58 | 0.1925 |
| MECR_MOUSE   | Trans-2-enoyl-CoA reductase, mitochondrial;                        | -2.00 | 0.1926 |
| IPKA_MOUSE   | cAMP-dependent protein kinase inhibitor alpha;                     | -1.81 | 0.193  |
| RET1_MOUSE   | Retinol-binding protein 1;                                         | 2.32  | 0.1945 |
| TBB5_MOUSE   | Tubulin beta-5 chain;                                              | 0.77  | 0.1948 |
| TAGL2_MOUSE  | Transgelin-2;                                                      | 0.46  | 0.1949 |
| ROA2_MOUSE   | Heterogeneous nuclear ribonucleoproteins A2/B1;                    | -0.63 | 0.1966 |
| CORO7_MOUSE  | Coronin-7;                                                         | 1.42  | 0.1973 |
| DIDO1_MOUSE  | Death-inducer obliterator 1;                                       | 1.58  | 0.1974 |
| MPPB_MOUSE   | Mitochondrial-processing peptidase subunit alpha;                  | -2.32 | 0.1974 |
| PTN11_MOUSE  | Tyrosine-protein phosphatase non-receptor type 11;                 | -0.94 | 0.1984 |
| UBXN6_MOUSE  | UBX domain-containing protein 6;                                   | -1.74 | 0.2001 |



|              |                                                                            |       |        |
|--------------|----------------------------------------------------------------------------|-------|--------|
| IC1_MOUSE    | Huntingtin-interacting protein K;                                          | 0.93  | 0.2002 |
| DJC11_MOUSE  | DnaJ homolog subfamily C member 11;                                        | 1.81  | 0.2006 |
| AATM_MOUSE   | Aspartate aminotransferase, mitochondrial;                                 | -0.40 | 0.201  |
| TBB2C_MOUSE  | Tubulin beta-2C chain;                                                     | 0.37  | 0.2011 |
| UBQL2_MOUSE  | Ubiquilin-2;                                                               | 1.17  | 0.2016 |
| SKP1_MOUSE   | S-phase kinase-associated protein 1;                                       | 0.83  | 0.2017 |
| MBB1A_MOUSE  | Myb-binding protein 1A;                                                    | -1.58 | 0.202  |
| SUCB2_MOUSE  | Succinyl-CoA ligase [GDP-forming] subunit beta, mitochondrial;             | -0.77 | 0.2021 |
| ASAH1_MOUSE  | Acid ceramidase;                                                           | 2.32  | 0.2023 |
| FLNB_MOUSE   | Filamin-B;                                                                 | 1.74  | 0.2026 |
| ITB1_MOUSE   | Integrin beta-1;                                                           | 1.00  | 0.2032 |
| ARK72_MOUSE  | Aflatoxin B1 aldehyde reductase member 2;                                  | -1.00 | 0.204  |
| BCKD_MOUSE   | [3-methyl-2-oxobutanoate dehydrogenase [lipoamide]] kinase, mitochondrial; | -2.00 | 0.2044 |
| GSTA3_MOUSE  | Glutathione S-transferase A3;                                              | -1.81 | 0.2047 |
| UCHL1_MOUSE  | Ubiquitin carboxyl-terminal hydrolase isozyme L1;                          | 0.70  | 0.2047 |
| METK1_MOUSE  | S-adenosylmethionine synthase isoform type-1;                              | 2.00  | 0.2048 |
| ISC2A_MOUSE  | Isochorismatase domain-containing protein 2A, mitochondrial;               | -1.00 | 0.2053 |
| TTHY_MOUSE   | Transthyretin;                                                             | -0.72 | 0.2068 |
| HPS6_MOUSE   | Hermansky-Pudlak syndrome 6 protein homolog;                               | -2.58 | 0.2077 |
| ACD11_MOUSE  | Acyl-CoA dehydrogenase family member 11;                                   | 1.58  | 0.2079 |
| RN114_MOUSE  | RING finger protein 114;                                                   | 0.66  | 0.2079 |
| CO3_MOUSE    | Complement C3;                                                             | 0.06  | 0.2087 |
| HEM2_MOUSE   | Delta-aminolevulinic acid dehydratase;                                     | -0.69 | 0.2093 |
| TCPE_MOUSE   | T-complex protein 1 subunit epsilon;                                       | -0.54 | 0.2093 |
| AAKG1_MOUSE  | 5'-AMP-activated protein kinase subunit gamma-1;                           | 2.00  | 0.2095 |
| ERF3A_MOUSE  | Eukaryotic peptide chain release factor GTP-binding subunit ERF3A;         | 1.58  | 0.2096 |
| Q6IFT3_MOUSE | Keratin Kb40;                                                              | -2.46 | 0.2101 |
| HEM4_MOUSE   | Uroporphyrinogen-III synthase;                                             | 0.74  | 0.211  |
| IMA3_MOUSE   | Importin subunit alpha-3;                                                  | 1.32  | 0.2114 |
| GPX3_MOUSE   | Glutathione peroxidase 3;                                                  | 0.49  | 0.2116 |
| PTER_MOUSE   | Phosphotriesterase-related protein;                                        | -2.00 | 0.2119 |
| EF1B_MOUSE   | Elongation factor 1-beta;                                                  | -0.69 | 0.2126 |
| C1QBP_MOUSE  | Complement component 1 Q subcomponent-binding protein, mitochondrial;      | -0.64 | 0.2148 |
| CA2D1_MOUSE  | Voltage-dependent calcium channel subunit alpha-2/delta-1;                 | 1.72  | 0.2148 |
| CBPE_MOUSE   | Carboxypeptidase E;                                                        | 1.42  | 0.2153 |
| NUDC2_MOUSE  | NudC domain-containing protein 2;                                          | 1.81  | 0.2153 |
| OTUB1_MOUSE  | Ubiquitin thioesterase OTUB1;                                              | 0.54  | 0.2164 |
| NONO_MOUSE   | Non-POU domain-containing octamer-binding protein;                         | -1.87 | 0.2167 |
| CLYBL_MOUSE  | Citrate lyase subunit beta-like protein, mitochondrial;                    | -1.00 | 0.2171 |
| CISD2_MOUSE  | CDGSH iron-sulfur domain-containing protein 2;                             | 1.58  | 0.2177 |
| MTP18_MOUSE  | Mitochondrial fission protein MTP18;                                       | -1.58 | 0.2183 |
| HOT_MOUSE    | Hydroxyacid-oxoacid transhydrogenase, mitochondrial;                       | -1.17 | 0.2186 |
| P4K2A_MOUSE  | Phosphatidylinositol 4-kinase type 2-alpha;                                | 1.58  | 0.2189 |
| S2546_MOUSE  | Solute carrier family 25 member 46;                                        | 1.58  | 0.2189 |
| DAF1_MOUSE   | Complement decay-accelerating factor, GPI-anchored;                        | 1.58  | 0.2194 |
| FLOT2_MOUSE  | Flotillin-2;                                                               | 1.58  | 0.2194 |
| EF1A1_MOUSE  | Elongation factor 1-alpha 1;                                               | -0.48 | 0.2198 |

|              |                                                                  |       |        |
|--------------|------------------------------------------------------------------|-------|--------|
| ECE1_MOUSE   | Endothelin-converting enzyme 1;                                  | 3.00  | 0.2207 |
| CHCH6_MOUSE  | Coiled-coil-helix-coiled-coil-helix domain-containing protein 6; | 2.17  | 0.2222 |
| SHLB1_MOUSE  | Endophilin-B1;                                                   | 1.22  | 0.2222 |
| PA1B2_MOUSE  | Platelet-activating factor acetylhydrolase IB subunit beta;      | -1.22 | 0.2223 |
| SC22B_MOUSE  | Vesicle-trafficking protein SEC22b;                              | 3.32  | 0.2243 |
| RS4X_MOUSE   | 40S ribosomal protein S4, X isoform;                             | 1.28  | 0.2244 |
| CTL2_MOUSE   | Choline transporter-like protein 2;                              | 3.00  | 0.2245 |
| FIBB_MOUSE   | Fibrinogen beta chain;                                           | 0.19  | 0.226  |
| TADBP_MOUSE  | TAR DNA-binding protein 43;                                      | -1.00 | 0.2262 |
| B0QZL1_MOUSE | Enolase;                                                         | 1.26  | 0.2275 |
| FKBP2_MOUSE  | Peptidyl-prolyl cis-trans isomerase FKBP2;                       | 3.00  | 0.2276 |
| CPT2_MOUSE   | Carnitine O-palmitoyltransferase 2, mitochondrial;               | -0.59 | 0.2279 |
| RL23A_MOUSE  | 60S ribosomal protein L23a;                                      | 1.00  | 0.228  |
| PECA1_MOUSE  | Xaa-Pro dipeptidase;                                             | 1.26  | 0.2283 |
| NDUS1_MOUSE  | NADH-ubiquinone oxidoreductase 75 kDa subunit, mitochondrial;    | -0.30 | 0.2285 |
| SYAC_MOUSE   | Alanyl-tRNA synthetase, cytoplasmic;                             | 1.81  | 0.2287 |
| HPT_MOUSE    | Haptoglobin;                                                     | 1.09  | 0.2304 |
| MYL1_MOUSE   | Myosin light chain 1/3, skeletal muscle isoform;                 | 0.81  | 0.2309 |
| GRSF1_MOUSE  | G-rich sequence factor 1;                                        | -2.58 | 0.2318 |
| 5NT3_MOUSE   | Cytosolic 5'-nucleotidase 3;                                     | -0.75 | 0.2335 |
| CAV1_MOUSE   | Caveolin-1;                                                      | -1.58 | 0.2337 |
| LSM2_MOUSE   | U6 snRNA-associated Sm-like protein LSM2;                        | -1.32 | 0.2342 |
| ZYX_MOUSE    | Zyxin;                                                           | 0.58  | 0.2342 |
| FLOT1_MOUSE  | Flotillin-1;                                                     | 2.00  | 0.2343 |
| SRP68_MOUSE  | Signal recognition particle 68 kDa protein;                      | 2.00  | 0.2346 |
| TFR1_MOUSE   | Transferrin receptor protein 1;                                  | 2.00  | 0.2348 |
| CUTC_MOUSE   | Copper homeostasis protein cutC homolog;                         | -1.58 | 0.2351 |
| CAD13_MOUSE  | Cadherin-13;                                                     | -0.22 | 0.2379 |
| EGF_MOUSE    | Pro-epidermal growth factor;                                     | -1.42 | 0.2391 |
| TBB2B_MOUSE  | Tubulin beta-2B chain;                                           | 0.54  | 0.2394 |
| CSN5_MOUSE   | COP9 signalosome complex subunit 5;                              | 1.58  | 0.2397 |
| ATP8_MOUSE   | ATP synthase protein 8;                                          | -1.32 | 0.2398 |
| RL18_MOUSE   | 60S ribosomal protein L18;                                       | -0.49 | 0.2405 |
| TXNL1_MOUSE  | Thioredoxin-like protein 1;                                      | -1.04 | 0.2406 |
| SC31A_MOUSE  | Protein transport protein Sec31A;                                | 1.32  | 0.2407 |
| RRF2M_MOUSE  | Ribosome-releasing factor 2, mitochondrial;                      | -1.58 | 0.241  |
| KAPCA_MOUSE  | cAMP-dependent protein kinase catalytic subunit alpha;           | -0.70 | 0.2411 |
| Q1MWP8_MOUSE | EH-domain containing 4-KJR;                                      | 0.53  | 0.2416 |
| MGDP1_MOUSE  | Magnesium-dependent phosphatase 1;                               | 0.24  | 0.2417 |
| PSD7_MOUSE   | 26S proteasome non-ATPase regulatory subunit 7;                  | -0.47 | 0.2418 |
| PAXI_MOUSE   | Paxillin;                                                        | -1.22 | 0.2419 |
| RADI_MOUSE   | Radixin;                                                         | 1.38  | 0.2419 |
| SYMC_MOUSE   | Methionyl-tRNA synthetase, cytoplasmic;                          | 2.00  | 0.2419 |
| PRPS1_MOUSE  | 26S protease regulatory subunit 10B;                             | -1.32 | 0.2425 |
| CNPY2_MOUSE  | Protein canopy homolog 2;                                        | 1.22  | 0.2432 |
| Q3TIY5_MOUSE | Putative uncharacterized protein;                                | 3.00  | 0.2442 |
| Q3TSX8_MOUSE | Putative uncharacterized protein;                                | 1.00  | 0.2443 |
| EIF3E_MOUSE  | Eukaryotic translation initiation factor 3 subunit E;            | 1.58  | 0.2447 |

|              |                                                                                   |       |        |
|--------------|-----------------------------------------------------------------------------------|-------|--------|
| PANK4_MOUSE  | Pantothenate kinase 4;                                                            | -1.32 | 0.245  |
| A1AT1_MOUSE  | Alpha-1-antitrypsin 1-1;                                                          | -0.32 | 0.2455 |
| NIT1_MOUSE   | Nitrilase homolog 1;                                                              | 0.58  | 0.2458 |
| CPT1B_MOUSE  | Carnitine O-palmitoyltransferase 1, muscle isoform;                               | -0.50 | 0.2461 |
| FXR1_MOUSE   | Fragile X mental retardation syndrome-related protein 1;                          | -1.32 | 0.2463 |
| LONM_MOUSE   | Lon protease homolog, mitochondrial;                                              | 0.79  | 0.2467 |
| Q78JN3_MOUSE | MCG120270, isoform CRA_a;                                                         | -1.58 | 0.2467 |
| C1TC_MOUSE   | C-1-tetrahydrofolate synthase, cytoplasmic;                                       | -0.54 | 0.2474 |
| ROA1_MOUSE   | Heterogeneous nuclear ribonucleoprotein A1;                                       | -1.32 | 0.2493 |
| FINC_MOUSE   | Fibronectin;                                                                      | 2.00  | 0.2495 |
| RS14_MOUSE   | 40S ribosomal protein S14;                                                        | -0.74 | 0.2496 |
| CA093_MOUSE  | Uncharacterized protein C1orf93 homolog;                                          | 0.58  | 0.2504 |
| FAHD2_MOUSE  | Fumarylacetoacetate hydrolase domain-containing protein 2A;                       | -1.09 | 0.2507 |
| CD47_MOUSE   | Leukocyte surface antigen CD47;                                                   | -1.32 | 0.2509 |
| PAIRB_MOUSE  | Plasminogen activator inhibitor 1 RNA-binding protein;                            | 0.44  | 0.2514 |
| AT1B1_MOUSE  | Sodium/potassium-transporting ATPase subunit beta-1;                              | -0.51 | 0.2537 |
| PCBP1_MOUSE  | Poly(rC)-binding protein 1;                                                       | 0.85  | 0.2539 |
| A2A850_MOUSE | Acyl-Coenzyme A oxidase 1, palmitoyl;                                             | 0.77  | 0.2544 |
| TIM16_MOUSE  | Mitochondrial import inner membrane translocase subunit Tim16;                    | -0.29 | 0.2546 |
| NDRG3_MOUSE  | Protein NDRG3;                                                                    | 1.00  | 0.2547 |
| HNRPK_MOUSE  | Heterogeneous nuclear ribonucleoprotein K;                                        | -0.33 | 0.2551 |
| PAG16_MOUSE  | Group XVI phospholipase A2;                                                       | 1.81  | 0.2552 |
| OGT1_MOUSE   | UDP-N-acetylglucosamine--peptide N-acetylglucosaminyltransferase 110 kDa subunit; | 1.00  | 0.256  |
| PUR9_MOUSE   | Bifunctional purine biosynthesis protein PURH;                                    | 0.38  | 0.2562 |
| AT2A2_MOUSE  | Sarcoplasmic/endoplasmic reticulum calcium ATPase 2;                              | 0.48  | 0.2567 |
| IN35_MOUSE   | Interferon-induced 35 kDa protein homolog;                                        | -2.00 | 0.2574 |
| PDC6I_MOUSE  | Programmed cell death protein 5;                                                  | 0.27  | 0.2575 |
| HXK2_MOUSE   | Hexokinase-1;                                                                     | -0.50 | 0.2576 |
| USMG5_MOUSE  | Up-regulated during skeletal muscle growth protein 5;                             | 1.58  | 0.2577 |
| PPTC7_MOUSE  | Peroxiredoxin-1;                                                                  | -1.58 | 0.2593 |
| UBA3_MOUSE   | NEDD8-activating enzyme E1 catalytic subunit;                                     | -1.58 | 0.2599 |
| NDUS3_MOUSE  | NADH dehydrogenase [ubiquinone] iron-sulfur protein 3, mitochondrial;             | -0.68 | 0.261  |
| SET_MOUSE    | Protein SET;                                                                      | 1.58  | 0.2611 |
| AT5F1_MOUSE  | ATP synthase subunit b, mitochondrial;                                            | -0.57 | 0.2615 |
| PDXD1_MOUSE  | Pyridoxal kinase;                                                                 | 1.58  | 0.262  |
| MRC1_MOUSE   | Macrophage mannose receptor 1;                                                    | 1.12  | 0.2623 |
| EGFR_MOUSE   | Epidermal growth factor receptor;                                                 | 0.51  | 0.2629 |
| NDUA3_MOUSE  | NADH dehydrogenase [ubiquinone] 1 alpha subcomplex subunit 3;                     | -0.30 | 0.2634 |
| Q5QGU0_MOUSE | Receptor expression enhancing protein 5;                                          | 1.32  | 0.2638 |
| PA2G4_MOUSE  | Proliferation-associated protein 2G4;                                             | -0.81 | 0.2645 |
| PABP1_MOUSE  | Polyadenylate-binding protein 1;                                                  | -0.79 | 0.2646 |
| CANB1_MOUSE  | Calcineurin subunit B type 1;                                                     | 1.58  | 0.2648 |
| MYOF_MOUSE   | Myoferlin;                                                                        | 1.58  | 0.2661 |
| A2AGN7_MOUSE | Proteasome (Prosome, macropain) 26S subunit ATPase 3;                             | 1.58  | 0.2669 |
| TCPZ_MOUSE   | T-complex protein 1 subunit zeta;                                                 | -0.58 | 0.2678 |
| CD37L_MOUSE  | Hsp90 co-chaperone Cdc37-like 1;                                                  | 1.58  | 0.2695 |
| CPN2_MOUSE   | Carboxypeptidase N subunit 2;                                                     | -1.32 | 0.2702 |

|              |                                                               |       |        |
|--------------|---------------------------------------------------------------|-------|--------|
| FABD_MOUSE   | Malonyl-CoA-acyl carrier protein transacylase, mitochondrial; | -1.22 | 0.2707 |
| TRXR2_MOUSE  | Thioredoxin reductase 2, mitochondrial;                       | -1.58 | 0.2719 |
| PTPS_MOUSE   | 6-pyruvoyl tetrahydrobiopterin synthase;                      | -0.86 | 0.2727 |
| Q3TXG4_MOUSE | Adaptor protein complex AP-1, beta 1 subunit, isoform CRA_b;  | -1.10 | 0.2727 |
| NOP58_MOUSE  | Nucleolar protein 58;                                         | 2.00  | 0.2733 |
| ULA1_MOUSE   | NEDD8-activating enzyme E1 regulatory subunit;                | -1.58 | 0.2737 |
| F1142_MOUSE  | Protein FAM114A2;                                             | -1.81 | 0.2741 |
| UBC12_MOUSE  | NEDD8-conjugating enzyme Ubc12;                               | 2.00  | 0.2753 |
| RAB10_MOUSE  | Ras-related protein Rab-10;                                   | 1.58  | 0.2755 |
| SYIM_MOUSE   | Isoleucyl-tRNA synthetase, mitochondrial;                     | -0.95 | 0.2759 |
| RL24_MOUSE   | 60S ribosomal protein L24;                                    | -2.00 | 0.2769 |
| ACSA_MOUSE   | Acetyl-coenzyme A synthetase, cytoplasmic;                    | -1.32 | 0.2781 |
| CO6A2_MOUSE  | Collagen alpha-2(VI) chain;                                   | 1.81  | 0.2795 |
| MYL3_MOUSE   | Myosin light chain 3;                                         | 0.06  | 0.2795 |
| MYL6_MOUSE   | Myosin light polypeptide 6;                                   | 0.82  | 0.2808 |
| UBXN1_MOUSE  | UBX domain-containing protein 1;                              | -1.08 | 0.2809 |
| TAGL_MOUSE   | Transgelin;                                                   | 1.32  | 0.2811 |
| GSTM2_MOUSE  | Glutathione S-transferase Mu 2;                               | -0.24 | 0.2813 |
| Q5M9K5_MOUSE | NADH dehydrogenase (Ubiquinone) 1 alpha subcomplex, 12;       | -0.70 | 0.2813 |
| ABCF3_MOUSE  | ATP-binding cassette sub-family F member 3;                   | 1.22  | 0.2818 |
| Q99K47_MOUSE | Fibrinogen, alpha polypeptide;                                | -0.58 | 0.2819 |
| FERM1_MOUSE  | Fermitin family homolog 1;                                    | 0.87  | 0.2828 |
| PPP5_MOUSE   | Protein phosphatase PTC7 homolog;                             | -1.26 | 0.2846 |
| MFN1_MOUSE   | Mitofusin-1;                                                  | -2.00 | 0.2847 |
| RL35A_MOUSE  | 60S ribosomal protein L35a;                                   | -2.00 | 0.285  |
| NNTM_MOUSE   | NAD(P) transhydrogenase, mitochondrial;                       | -0.36 | 0.2853 |
| MTPN_MOUSE   | Myotrophin;                                                   | 1.14  | 0.2856 |
| RAB3I_MOUSE  | Rab-3A-interacting protein;                                   | 3.00  | 0.2857 |
| UGGG1_MOUSE  | UDP-glucose:glycoprotein glucosyltransferase 1;               | 0.74  | 0.2859 |
| CTBP1_MOUSE  | C-terminal-binding protein 1;                                 | -1.81 | 0.2873 |
| BSDC1_MOUSE  | BSD domain-containing protein 1;                              | 2.00  | 0.2876 |
| TRAP1_MOUSE  | Heat shock protein 75 kDa, mitochondrial;                     | 0.49  | 0.2879 |
| VMA5A_MOUSE  | von Willebrand factor A domain-containing protein 5A;         | 1.74  | 0.2879 |
| K2C1B_MOUSE  | Keratin, type II cytoskeletal 1b;                             | -1.36 | 0.2882 |
| Q5U470_MOUSE | Rpl3l protein;                                                | -1.81 | 0.2883 |
| ENSA_MOUSE   | Alpha-endosulfine;                                            | 0.58  | 0.2888 |
| AFAM_MOUSE   | Afamin;                                                       | 1.58  | 0.2894 |
| Q3TDN8_MOUSE | Putative uncharacterized protein;                             | 1.14  | 0.2895 |
| A2CG35_MOUSE | RAB12, member RAS oncogene family;                            | -1.22 | 0.2904 |
| COF1_MOUSE   | Cofilin-1;                                                    | 0.12  | 0.2905 |
| PPME1_MOUSE  | Protein phosphatase 1 regulatory subunit 3A;                  | -2.58 | 0.2908 |
| MOT1_MOUSE   | Monocarboxylate transporter 1;                                | -1.14 | 0.2909 |
| TBCA_MOUSE   | Tubulin-specific chaperone A;                                 | 0.91  | 0.2924 |
| SUOX_MOUSE   | Sulfite oxidase, mitochondrial;                               | -0.69 | 0.2926 |
| APMAP_MOUSE  | Adipocyte plasma membrane-associated protein;                 | 1.32  | 0.2935 |
| Q7TNL9_MOUSE | Coiled-coil-helix-coiled-coil-helix domain containing 10;     | -0.55 | 0.2936 |
| HNRPQ_MOUSE  | Heterogeneous nuclear ribonucleoprotein Q;                    | 0.35  | 0.2951 |
| EHD2_MOUSE   | EH domain-containing protein 2;                               | -0.87 | 0.2953 |

|             |                                                                             |       |        |
|-------------|-----------------------------------------------------------------------------|-------|--------|
| UBE2N_MOUSE | Ubiquitin-conjugating enzyme E2 N;                                          | 0.29  | 0.296  |
| NDUA7_MOUSE | NADH dehydrogenase [ubiquinone] 1 alpha subcomplex subunit 7;               | -0.85 | 0.2966 |
| ACBP_MOUSE  | Acyl-CoA-binding protein;                                                   | -0.78 | 0.2972 |
| SYVC_MOUSE  | Valyl-tRNA synthetase;                                                      | 1.22  | 0.2993 |
| IMA4_MOUSE  | Importin subunit alpha-4                                                    | 0.58  | 0.2997 |
| GALT_MOUSE  | Galactose-1-phosphate uridylyltransferase;                                  | 1.58  | 0.2999 |
| UQCC_MOUSE  | Ubiquinol-cytochrome c reductase complex chaperone CBP3 homolog;            | -2.00 | 0.2999 |
| IGG2B_MOUSE | Ig gamma-2B chain C region;                                                 | 0.85  | 0.3004 |
| SCRN3_MOUSE | Secernin-3;                                                                 | -1.44 | 0.3009 |
| CNBP_MOUSE  | Cellular nucleic acid-binding protein;                                      | 0.58  | 0.303  |
| OSTF1_MOUSE | Osteoclast-stimulating factor 1;                                            | -1.58 | 0.3036 |
| FKBP4_MOUSE | Peptidyl-prolyl cis-trans isomerase FKBP4;                                  | -0.54 | 0.3044 |
| PSA4_MOUSE  | Proteasome subunit alpha type-4;                                            | 0.95  | 0.3049 |
| ADDA_MOUSE  | Alpha-adducin;                                                              | -1.00 | 0.3056 |
| BZW2_MOUSE  | Basic leucine zipper and W2 domain-containing protein 2;                    | 0.81  | 0.3058 |
| DDX1_MOUSE  | ATP-dependent RNA helicase DDX1;                                            | -1.08 | 0.3058 |
| EF2_MOUSE   | Elongation factor 2;                                                        | 0.17  | 0.3059 |
| ANXA1_MOUSE | Annexin A1;                                                                 | 0.53  | 0.3065 |
| RAB18_MOUSE | Ras-related protein Rab-18;                                                 | 1.81  | 0.307  |
| GCDH_MOUSE  | Glutaryl-CoA dehydrogenase, mitochondrial;                                  | -1.58 | 0.3073 |
| CSRP1_MOUSE | Cysteine and glycine-rich protein 1;                                        | 0.87  | 0.3079 |
| 5NTC_MOUSE  | Cytosolic purine 5'-nucleotidase;                                           | 1.58  | 0.3087 |
| GRB2_MOUSE  | Growth factor receptor-bound protein 2;                                     | 0.51  | 0.309  |
| FABPH_MOUSE | Fatty acid-binding protein, heart;                                          | -0.15 | 0.3096 |
| IF4B_MOUSE  | Eukaryotic translation initiation factor 4B;                                | 0.46  | 0.3098 |
| EIF3D_MOUSE | Eukaryotic translation initiation factor 3 subunit D;                       | 2.32  | 0.3109 |
| H12_MOUSE   | Histone H1.2;                                                               | 0.74  | 0.3111 |
| PRDX1_MOUSE | Thioredoxin-dependent peroxide reductase, mitochondrial;                    | 0.26  | 0.3122 |
| ELOB_MOUSE  | Transcription elongation factor B polypeptide 2;                            | -1.42 | 0.3124 |
| BOLA2_MOUSE | BolA-like protein 2;                                                        | 0.74  | 0.313  |
| COPZ1_MOUSE | Coatomer subunit zeta-1;                                                    | 1.58  | 0.313  |
| VATB2_MOUSE | V-type proton ATPase subunit B, brain isoform;                              | -1.17 | 0.3131 |
| SLK_MOUSE   | STE20-like serine/threonine-protein kinase;                                 | -0.87 | 0.3138 |
| DHE3_MOUSE  | Glutamate dehydrogenase 1, mitochondrial;                                   | -0.77 | 0.314  |
| LA_MOUSE    | Lupus La protein homolog;                                                   | 1.22  | 0.3142 |
| TNNC1_MOUSE | Troponin C, slow skeletal and cardiac muscles;                              | -0.18 | 0.3144 |
| DJB11_MOUSE | DnaJ homolog subfamily B member 11;                                         | 1.58  | 0.3146 |
| ZNF2_MOUSE  | Zinc finger protein 2;                                                      | 1.58  | 0.3147 |
| NDUC2_MOUSE | NADH dehydrogenase [ubiquinone] 1 subunit C2;                               | -0.37 | 0.3149 |
| VDAC1_MOUSE | Voltage-dependent anion-selective channel protein 1;                        | -0.13 | 0.3159 |
| NACAM_MOUSE | Nascent polypeptide-associated complex subunit alpha, muscle-specific form; | -0.24 | 0.3167 |
| IQGA1_MOUSE | Ras GTPase-activating-like protein IQGAP1;                                  | 0.76  | 0.3169 |
| DKC1_MOUSE  | H/ACA ribonucleoprotein complex subunit 4;                                  | -1.00 | 0.3176 |
| SPS2_MOUSE  | Selenide, water dikinase 2;                                                 | -3.00 | 0.3191 |
| GLRX1_MOUSE | Glutaredoxin-1;                                                             | 0.30  | 0.3202 |
| RPN2_MOUSE  | Dolichyl-diphosphooligosaccharide--protein glycosyltransferase subunit 2;   | -0.81 | 0.3204 |
| BOLA1_MOUSE | BolA-like protein 1;                                                        | -1.22 | 0.3224 |

|              |                                                                |       |        |
|--------------|----------------------------------------------------------------|-------|--------|
| UCHL3_MOUSE  | Ubiquitin carboxyl-terminal hydrolase isozyme L3;              | -0.72 | 0.3236 |
| PRS6A_MOUSE  | 26S protease regulatory subunit 6B;                            | -0.20 | 0.3238 |
| Q80YQ1_MOUSE | Thrombospondin 1;                                              | 1.00  | 0.3238 |
| Q9QZ83_MOUSE | Gamma actin-like protein;                                      | 1.58  | 0.3238 |
| CSN1_MOUSE   | COP9 signalosome complex subunit 1;                            | 0.74  | 0.3243 |
| CATD_MOUSE   | Cathepsin D;                                                   | 0.42  | 0.3246 |
| ASM3A_MOUSE  | Acid sphingomyelinase-like phosphodiesterase 3a;               | 1.26  | 0.3252 |
| KAP2_MOUSE   | cAMP-dependent protein kinase type II-alpha regulatory subunit | 0.63  | 0.3256 |
| MATR3_MOUSE  | Matrin-3;                                                      | 0.58  | 0.3261 |
| IDHP_MOUSE   | Isocitrate dehydrogenase [NADP], mitochondrial;                | 0.29  | 0.3271 |
| IGHG3_MOUSE  | Ig gamma-3 chain C region;                                     | 1.00  | 0.3273 |
| Q3TVV6_MOUSE | Putative uncharacterized protein;                              | -1.58 | 0.3281 |
| PFD3_MOUSE   | Prefoldin subunit 5;                                           | -1.17 | 0.3287 |
| S10A9_MOUSE  | Protein S100-A9;                                               | 0.58  | 0.3288 |
| TCPG_MOUSE   | T-complex protein 1 subunit gamma;                             | -0.45 | 0.329  |
| CYTB_MOUSE   | Cystatin-B;                                                    | 1.12  | 0.3307 |
| Q99LC4_MOUSE | Igh protein;                                                   | -0.85 | 0.3318 |
| ANFY1_MOUSE  | Ankyrin repeat and FYVE domain-containing protein 1;           | 1.32  | 0.332  |
| STX12_MOUSE  | Syntaxin-12;                                                   | 0.78  | 0.3324 |
| PALMD_MOUSE  | Palmdelphin;                                                   | -1.58 | 0.3328 |
| B1ATI0_MOUSE | Clathrin light polypeptide (Lca);                              | 1.58  | 0.3329 |
| S10AA_MOUSE  | Protein S100-A10;                                              | 1.00  | 0.3331 |
| MA2C1_MOUSE  | Alpha-mannosidase 2C1;                                         | 1.58  | 0.3337 |
| ESTD_MOUSE   | S-formylglutathione hydrolase;                                 | 0.29  | 0.3338 |
| RBBP7_MOUSE  | Histone-binding protein RBBP7;                                 | -2.00 | 0.3344 |
| S10A8_MOUSE  | Protein S100-A8;                                               | -0.74 | 0.3345 |
| GSHR_MOUSE   | Glutathione reductase, mitochondrial;                          | 0.50  | 0.335  |
| RL21_MOUSE   | 60S ribosomal protein L21;                                     | -0.17 | 0.335  |
| BAG2_MOUSE   | BAG family molecular chaperone regulator 2;                    | -1.58 | 0.3351 |
| CAPZB_MOUSE  | F-actin-capping protein subunit beta;                          | 0.89  | 0.3351 |
| Q148Q7_MOUSE | Putative uncharacterized protein;                              | -1.00 | 0.3354 |
| K0664_MOUSE  | Protein KIAA0664;                                              | -1.46 | 0.3359 |
| UBR4_MOUSE   | E3 ubiquitin-protein ligase UBR4;                              | 2.00  | 0.3364 |
| HINT2_MOUSE  | Histidine triad nucleotide-binding protein 2, mitochondrial;   | 0.28  | 0.3366 |
| LYPA2_MOUSE  | Acyl-protein thioesterase 2;                                   | -1.00 | 0.3377 |
| PSB2_MOUSE   | Proteasome subunit beta type-2;                                | -1.00 | 0.3391 |
| ACO13_MOUSE  | Acyl-coenzyme A thioesterase 13;                               | -0.93 | 0.3394 |
| HVM12_MOUSE  | E3 ubiquitin-protein ligase HUWE1;                             | 0.32  | 0.3398 |
| PHP14_MOUSE  | Phosphatidylinositol-binding clathrin assembly protein;        | -0.67 | 0.34   |
| RILP_MOUSE   | Rab-interacting lysosomal protein;                             | -2.32 | 0.3406 |
| TKT_MOUSE    | Transketolase;                                                 | 0.28  | 0.3408 |
| FHL2_MOUSE   | Four and a half LIM domains protein 2;                         | -1.58 | 0.3416 |
| THTR_MOUSE   | Thiosulfate sulfurtransferase;                                 | -2.00 | 0.3421 |
| PSMD5_MOUSE  | 26S proteasome non-ATPase regulatory subunit 5;                | -1.00 | 0.3427 |
| TECR_MOUSE   | Trans-2,3-enoyl-CoA reductase;                                 | 0.81  | 0.3428 |
| FETUB_MOUSE  | Fetuin-B;                                                      | 0.51  | 0.3435 |
| PPM1A_MOUSE  | Protein phosphatase 1F;                                        | 0.65  | 0.344  |
| SC23A_MOUSE  | Protein transport protein Sec23A;                              | 1.58  | 0.3459 |

|              |                                                                        |       |        |
|--------------|------------------------------------------------------------------------|-------|--------|
| IPO5_MOUSE   | Importin-5;                                                            | 1.26  | 0.3463 |
| RS8_MOUSE    | 40S ribosomal protein S8                                               | -0.65 | 0.3469 |
| CSDE1_MOUSE  | Cold shock domain-containing protein E1;                               | -2.32 | 0.3476 |
| AP2A2_MOUSE  | AP-2 complex subunit alpha-2;                                          | 1.32  | 0.3479 |
| CXAR_MOUSE   | Coxsackievirus and adenovirus receptor homolog;                        | -1.58 | 0.3482 |
| G3PT_MOUSE   | Glyceraldehyde-3-phosphate dehydrogenase, testis-specific;             | 0.25  | 0.3482 |
| STX4_MOUSE   | Syntaxin-4;                                                            | -1.58 | 0.3482 |
| GOGA4_MOUSE  | Golgin subfamily A member 4;                                           | 1.58  | 0.3487 |
| NRP1_MOUSE   | Neuropilin-1;                                                          | 1.58  | 0.3487 |
| PARD3_MOUSE  | Partitioning defective 3 homolog;                                      | 1.58  | 0.3487 |
| Q3U944_MOUSE | Putative uncharacterized protein;                                      | 0.85  | 0.3489 |
| ATP5I_MOUSE  | ATP synthase subunit e, mitochondrial;                                 | -0.68 | 0.349  |
| DIAC_MOUSE   | Di-N-acetylchitobiase;                                                 | 1.58  | 0.349  |
| C163A_MOUSE  | Scavenger receptor cysteine-rich type 1 protein M130;                  | 1.58  | 0.3492 |
| PLAP_MOUSE   | Plectin;                                                               | -0.32 | 0.3498 |
| EH1L1_MOUSE  | EH domain-binding protein 1-like protein 1;                            | 0.55  | 0.3501 |
| UBP14_MOUSE  | Ubiquitin carboxyl-terminal hydrolase 14;                              | -0.81 | 0.3507 |
| K2C1_MOUSE   | Keratin, type II cytoskeletal 1;                                       | 1.58  | 0.3508 |
| PFD5_MOUSE   | Phosphoglycerate mutase 1;                                             | 0.58  | 0.3532 |
| PGS1_MOUSE   | Geranylgeranyl transferase type-2 subunit alpha;                       | 1.58  | 0.3536 |
| Q9D7A0_MOUSE | Putative uncharacterized protein;                                      | -2.00 | 0.3545 |
| B2L13_MOUSE  | Bcl-2-like protein 13;                                                 | -0.22 | 0.3552 |
| TMEDA_MOUSE  | Transmembrane emp24 domain-containing protein 10;                      | 0.61  | 0.3556 |
| AKAP2_MOUSE  | A-kinase anchor protein 2;                                             | 0.74  | 0.3567 |
| CAND1_MOUSE  | Cullin-associated NEDD8-dissociated protein 1;                         | 0.68  | 0.3568 |
| PDCD5_MOUSE  | Protein disulfide-isomerase;                                           | 1.58  | 0.3571 |
| MFAP5_MOUSE  | Microfibrillar-associated protein 5;                                   | 2.32  | 0.3576 |
| PTRF_MOUSE   | Polymerase I and transcript release factor;                            | 0.29  | 0.3581 |
| AMACR_MOUSE  | Alpha-methylacyl-CoA racemase;                                         | -0.74 | 0.3588 |
| PGTA_MOUSE   | Prohibitin;                                                            | -1.58 | 0.3601 |
| RAB21_MOUSE  | Ras-related protein Rab-21;                                            | 1.22  | 0.3603 |
| DCPS_MOUSE   | Scavenger mRNA-decapping enzyme DcpS;                                  | -0.62 | 0.3615 |
| UAP56_MOUSE  | Spliceosome RNA helicase Bat1;                                         | -0.81 | 0.3625 |
| PGK2_MOUSE   | Phosphoglucomutase-1;                                                  | -1.22 | 0.3631 |
| AIMP2_MOUSE  | Aminoacyl tRNA synthase complex-interacting multifunctional protein 2; | 1.58  | 0.3632 |
| MP2K4_MOUSE  | Dual specificity mitogen-activated protein kinase kinase 4;            | 0.58  | 0.3633 |
| HERC4_MOUSE  | Probable E3 ubiquitin-protein ligase HERC4;                            | -1.58 | 0.3639 |
| CCD69_MOUSE  | Coiled-coil domain-containing protein 69;                              | 1.58  | 0.3643 |
| PRDX5_MOUSE  | Prolargin;                                                             | -0.31 | 0.3646 |
| ENOG_MOUSE   | Gamma-enolase;                                                         | -0.42 | 0.3647 |
| DHR11_MOUSE  | Dehydrogenase/reductase SDR family member 11;                          | 1.22  | 0.3668 |
| RFIP5_MOUSE  | Rab11 family-interacting protein 5;                                    | 0.81  | 0.3673 |
| RT4I1_MOUSE  | Reticulon-4-interacting protein 1, mitochondrial;                      | -0.51 | 0.3673 |
| Q80U83_MOUSE | MKIAA0079 protein;                                                     | 1.58  | 0.3684 |
| ARL8A_MOUSE  | ADP-ribosylation factor-like protein 8A;                               | -2.32 | 0.3685 |
| MPPA_MOUSE   | Mitogen-activated protein kinase scaffold protein 1;                   | -0.49 | 0.3686 |
| RS12_MOUSE   | 40S ribosomal protein S12;                                             | 0.77  | 0.3693 |
| Q9R1N4_MOUSE | Nitrilase 1;                                                           | -1.58 | 0.3704 |

|              |                                                                            |       |        |
|--------------|----------------------------------------------------------------------------|-------|--------|
| CPNE1_MOUSE  | Copine-1;                                                                  | -1.58 | 0.3707 |
| ILVBL_MOUSE  | Acetolactate synthase-like protein;                                        | 1.32  | 0.3707 |
| NQO2_MOUSE   | Ribosyl-dihydropyridine dehydrogenase [quinone];                           | -0.68 | 0.3707 |
| ACD10_MOUSE  | Acyl-CoA dehydrogenase family member 10;                                   | -0.46 | 0.3722 |
| SH3K1_MOUSE  | SH3 domain-containing kinase-binding protein 1;                            | -1.00 | 0.3724 |
| Q8C1P4_MOUSE | Putative uncharacterized protein;                                          | -1.00 | 0.3725 |
| GPSM1_MOUSE  | G-protein-signaling modulator 1;                                           | -1.32 | 0.3754 |
| NDUA2_MOUSE  | NADH dehydrogenase [ubiquinone] 1 alpha subcomplex subunit 2;              | -0.51 | 0.3757 |
| ACY3_MOUSE   | Aspartoacylase-2;                                                          | -1.42 | 0.376  |
| SPA3K_MOUSE  | Serine protease inhibitor A3K;                                             | -0.41 | 0.3765 |
| RL10A_MOUSE  | 60S ribosomal protein L10a;                                                | 0.67  | 0.3775 |
| IMMT_MOUSE   | Mitochondrial inner membrane protein;                                      | 0.06  | 0.3785 |
| MTCH2_MOUSE  | Mitochondrial carrier homolog 2;                                           | -0.32 | 0.3792 |
| MIA40_MOUSE  | Mitochondrial intermembrane space import and assembly protein 40;          | -1.00 | 0.3803 |
| DHRS4_MOUSE  | Dehydrogenase/reductase SDR family member 4;                               | -0.39 | 0.3813 |
| PSMD4_MOUSE  | 26S proteasome non-ATPase regulatory subunit 4;                            | 0.64  | 0.3815 |
| Q3TET3_MOUSE | Putative uncharacterized protein;                                          | -1.00 | 0.3821 |
| KIF5A_MOUSE  | Kinesin heavy chain isoform 5A;                                            | 1.00  | 0.3823 |
| TBA8_MOUSE   | Tubulin alpha-8 chain;                                                     | 0.58  | 0.3824 |
| RS28_MOUSE   | 40S ribosomal protein S28;                                                 | 0.68  | 0.3831 |
| 6PGD_MOUSE   | 6-phosphogluconate dehydrogenase, decarboxylating;                         | 0.29  | 0.3864 |
| CSRP3_MOUSE  | Cysteine and glycine-rich protein 3;                                       | 0.11  | 0.3866 |
| F136A_MOUSE  | Protein FAM136A;                                                           | -0.50 | 0.3869 |
| APOH_MOUSE   | Beta-2-glycoprotein 1;                                                     | 0.87  | 0.3884 |
| ADK_MOUSE    | Adenosine kinase;                                                          | -0.64 | 0.3886 |
| ANT3_MOUSE   | Antithrombin-III;                                                          | -0.37 | 0.3888 |
| GPX1_MOUSE   | Glutathione peroxidase 1;                                                  | 0.55  | 0.3889 |
| ATPG_MOUSE   | ATP synthase subunit gamma, mitochondrial;                                 | -0.32 | 0.3897 |
| MCCB_MOUSE   | Methylcrotonoyl-CoA carboxylase beta chain, mitochondrial;                 | -0.62 | 0.3899 |
| RRFM_MOUSE   | Ribosome-recycling factor, mitochondrial;                                  | -0.74 | 0.3909 |
| THY1_MOUSE   | Thy-1 membrane glycoprotein;                                               | 1.17  | 0.3912 |
| APOA4_MOUSE  | Apolipoprotein A-IV;                                                       | -0.49 | 0.3928 |
| ADIPO_MOUSE  | Adiponectin;                                                               | -0.19 | 0.3929 |
| SGCG_MOUSE   | Gamma-sarcoglycan;                                                         | -1.58 | 0.3932 |
| PLSI_MOUSE   | Plastin-3;                                                                 | 1.00  | 0.3936 |
| CFAH_MOUSE   | Complement factor H;                                                       | 0.58  | 0.3957 |
| Q3TME6_MOUSE | Putative uncharacterized protein;                                          | -0.68 | 0.3964 |
| RS20_MOUSE   | 40S ribosomal protein S20;                                                 | 0.74  | 0.3972 |
| TI8AB_MOUSE  | Putative mitochondrial import inner membrane translocase subunit Tim8 A-B; | 0.00  | 0.3977 |
| HNRPD_MOUSE  | Heterogeneous nuclear ribonucleoprotein D0;                                | -1.14 | 0.3978 |
| DPEP1_MOUSE  | Dipeptidase 1;                                                             | 0.70  | 0.3991 |
| SYDC_MOUSE   | Aspartyl-tRNA synthetase, cytoplasmic;                                     | -0.81 | 0.4004 |
| ACOT9_MOUSE  | Acyl-coenzyme A thioesterase 9, mitochondrial;                             | 0.81  | 0.4005 |
| CLIP1_MOUSE  | CAP-Gly domain-containing linker protein 1;                                | 0.24  | 0.4005 |
| ARFG1_MOUSE  | ADP-ribosylation factor GTPase-activating protein 1;                       | 2.00  | 0.4008 |
| NAR3_MOUSE   | Ecto-ADP-ribosyltransferase 3;                                             | -0.58 | 0.4008 |
| RS7_MOUSE    | 40S ribosomal protein S7;                                                  | 0.57  | 0.4011 |



|              |                                                                               |       |        |
|--------------|-------------------------------------------------------------------------------|-------|--------|
| DHAK_MOUSE   | Bifunctional ATP-dependent dihydroxyacetone kinase/FAD-AMP lyase (cyclizing); | 0.46  | 0.4012 |
| PP1B_MOUSE   | Serine/threonine-protein phosphatase 2A catalytic subunit alpha isoform;      | 0.85  | 0.4014 |
| ADCL1_MOUSE  | Neutral cholesterol ester hydrolase 1;                                        | -0.15 | 0.402  |
| KCC2D_MOUSE  | Calcium/calmodulin-dependent protein kinase type II subunit delta;            | -0.30 | 0.4022 |
| PPID_MOUSE   | Protein phosphatase 1A;                                                       | 1.00  | 0.4024 |
| SYAP1_MOUSE  | Synapse-associated protein 1;                                                 | 1.58  | 0.403  |
| PSB3_MOUSE   | Proteasome subunit beta type-3;                                               | -0.32 | 0.4037 |
| DOPD_MOUSE   | D-dopachrome decarboxylase;                                                   | 0.68  | 0.4039 |
| DCNL1_MOUSE  | DCN1-like protein 1;                                                          | 1.00  | 0.4051 |
| RL13_MOUSE   | 60S ribosomal protein L13;                                                    | 0.58  | 0.4064 |
| VATE1_MOUSE  | V-type proton ATPase subunit E 1;                                             | 1.00  | 0.4066 |
| AK1A1_MOUSE  | Alcohol dehydrogenase [NADP+];                                                | 0.49  | 0.4068 |
| Q921S3_MOUSE | Malic enzyme;                                                                 | -0.58 | 0.407  |
| Q3THH1_MOUSE | Putative uncharacterized protein;                                             | 0.45  | 0.4073 |
| DCTN1_MOUSE  | Dynactin subunit 1;                                                           | -0.13 | 0.4075 |
| GDIR2_MOUSE  | Rho GDP-dissociation inhibitor 2;                                             | -0.45 | 0.409  |
| MXRA8_MOUSE  | Matrix-remodeling-associated protein 8;                                       | 1.58  | 0.409  |
| APOOL_MOUSE  | Apolipoprotein O-like;                                                        | -0.85 | 0.4091 |
| Q05DT8_MOUSE | Igh protein;                                                                  | -1.46 | 0.4098 |
| TSNAX_MOUSE  | Translin-associated protein X;                                                | 0.58  | 0.4106 |
| LIFR_MOUSE   | Leukemia inhibitory factor receptor;                                          | 0.58  | 0.4112 |
| TM9S2_MOUSE  | Transmembrane 9 superfamily member 2;                                         | 1.12  | 0.4114 |
| CH10_MOUSE   | 10 kDa heat shock protein, mitochondrial;                                     | -0.56 | 0.4128 |
| PP2AA_MOUSE  | Lysophosphatidic acid phosphatase type 6;                                     | 0.67  | 0.4131 |
| SPCS2_MOUSE  | Signal peptidase complex subunit 2;                                           | 0.58  | 0.4164 |
| AT1B3_MOUSE  | Sodium/potassium-transporting ATPase subunit beta-3;                          | -1.00 | 0.4165 |
| G3BP2_MOUSE  | Ras GTPase-activating protein-binding protein 2;                              | 1.58  | 0.4169 |
| MAT2B_MOUSE  | Methionine adenosyltransferase 2 subunit beta;                                | -1.00 | 0.4174 |
| ODO1_MOUSE   | 2-oxoglutarate dehydrogenase, mitochondrial;                                  | -0.18 | 0.4174 |
| TCPQ_MOUSE   | T-complex protein 1 subunit theta;                                            | 0.92  | 0.4174 |
| LZTL1_MOUSE  | Leucine zipper transcription factor-like protein 1;                           | -0.58 | 0.4178 |
| DYN2_MOUSE   | Dynamamin-2;                                                                  | -1.32 | 0.4181 |
| MMGT1_MOUSE  | Membrane magnesium transporter 1;                                             | -1.58 | 0.4184 |
| ACSL5_MOUSE  | Long-chain-fatty-acid--CoA ligase 5;                                          | 1.58  | 0.4185 |
| CX7A2_MOUSE  | Cytochrome c oxidase subunit 7A2, mitochondrial;                              | -1.22 | 0.4185 |
| UBXN4_MOUSE  | UBX domain-containing protein 4;                                              | 0.00  | 0.4192 |
| UBAC1_MOUSE  | Ubiquitin-associated domain-containing protein 1;                             | -1.00 | 0.4197 |
| B8JG3_MOUSE  | Trk-fused gene;                                                               | 0.74  | 0.4206 |
| ETUD1_MOUSE  | Elongation factor Tu GTP-binding domain-containing protein 1;                 | -1.58 | 0.4207 |
| CNN3_MOUSE   | Calponin-3;                                                                   | 0.58  | 0.4212 |
| Q9CZI5_MOUSE | Putative uncharacterized protein;                                             | 1.32  | 0.4233 |
| RL18A_MOUSE  | 60S ribosomal protein L18a;                                                   | -0.74 | 0.4234 |
| GPD1L_MOUSE  | Glycerol-3-phosphate dehydrogenase 1-like protein;                            | 0.81  | 0.4236 |
| ALD2_MOUSE   | Aldose reductase-related protein 2;                                           | -0.53 | 0.4238 |
| NXP20_MOUSE  | Protein Noxp20;                                                               | 1.32  | 0.4249 |
| DENR_MOUSE   | Density-regulated protein;                                                    | -1.00 | 0.425  |
| YBOX2_MOUSE  | Y-box-binding protein 2;                                                      | -2.00 | 0.4253 |

|              |                                                                                    |       |        |
|--------------|------------------------------------------------------------------------------------|-------|--------|
| WDR90_MOUSE  | WD repeat-containing protein 90;                                                   | -2.32 | 0.4258 |
| GYS1_MOUSE   | Glycogen [starch] synthase, muscle;                                                | 0.38  | 0.4272 |
| ESTN_MOUSE   | Liver carboxylesterase N;                                                          | 0.03  | 0.4274 |
| Q3UDK4_MOUSE | Putative uncharacterized protein;                                                  | 0.58  | 0.4277 |
| PGM1_MOUSE   | Phosphoglucomutase-like protein 5;                                                 | 0.03  | 0.4279 |
| S27A1_MOUSE  | Long-chain fatty acid transport protein 1;                                         | -0.38 | 0.428  |
| ANXA3_MOUSE  | Annexin A3;                                                                        | 0.47  | 0.4284 |
| A2AUC9_MOUSE | Kelch repeat and BTB (POZ) domain containing 10;                                   | 0.37  | 0.4294 |
| IMDH2_MOUSE  | Inosine-5'-monophosphate dehydrogenase 2;                                          | -1.17 | 0.4294 |
| CDV3_MOUSE   | Protein CDV3;                                                                      | 0.49  | 0.4297 |
| SYK_MOUSE    | Lysyl-tRNA synthetase;                                                             | -1.00 | 0.4317 |
| F10A1_MOUSE  | Hsc70-interacting protein;                                                         | 0.70  | 0.4324 |
| RBM3_MOUSE   | Putative RNA-binding protein 3;                                                    | 0.58  | 0.4331 |
| RL9_MOUSE    | 60S ribosomal protein L9;                                                          | -0.85 | 0.4337 |
| PSME2_MOUSE  | Proteasome activator complex subunit 2;                                            | -0.31 | 0.4353 |
| RBPM5_MOUSE  | RNA-binding protein with multiple splicing;                                        | 0.42  | 0.4361 |
| CATC_MOUSE   | Dipeptidyl peptidase 1;                                                            | -0.85 | 0.4365 |
| RM12_MOUSE   | 39S ribosomal protein L12, mitochondrial;                                          | -0.89 | 0.4365 |
| 1433T_MOUSE  | 14-3-3 protein theta;                                                              | -0.49 | 0.437  |
| CD9_MOUSE    | CD9 antigen;                                                                       | 0.85  | 0.4371 |
| 2A5E_MOUSE   | Serine/threonine-protein phosphatase 2A 56 kDa regulatory subunit epsilon isoform; | 1.58  | 0.4374 |
| MAVS_MOUSE   | Mitochondrial antiviral-signaling protein;                                         | -0.51 | 0.4379 |
| Q80Y35_MOUSE | Nuclear mitotic apparatus protein 1;                                               | -0.32 | 0.4396 |
| NDUAB_MOUSE  | NADH dehydrogenase [ubiquinone] 1 alpha subcomplex subunit 11;                     | -0.51 | 0.4397 |
| NDUB7_MOUSE  | NADH dehydrogenase [ubiquinone] 1 beta subcomplex subunit 7;                       | -0.33 | 0.4408 |
| RPB11_MOUSE  | DNA-directed RNA polymerase II subunit RPB11;                                      | -1.58 | 0.4416 |
| ACTZ_MOUSE   | Alpha-centractin;                                                                  | -0.64 | 0.4444 |
| PRDX2_MOUSE  | Peroxiredoxin-4;                                                                   | 0.02  | 0.445  |
| RS10_MOUSE   | 40S ribosomal protein S10                                                          | 1.00  | 0.4452 |
| GLOD4_MOUSE  | Glyoxalase domain-containing protein 4;                                            | 0.10  | 0.4454 |
| SNTA1_MOUSE  | Alpha-1-syntrophin;                                                                | -1.00 | 0.4457 |
| TIM8A_MOUSE  | Mitochondrial import inner membrane translocase subunit Tim8 A;                    | -0.53 | 0.4459 |
| K22E_MOUSE   | Keratin, type II cytoskeletal 2 epidermal;                                         | -2.81 | 0.4464 |
| LIS1_MOUSE   | Platelet-activating factor acetylhydrolase IB subunit alpha;                       | -0.74 | 0.4465 |
| HNRPF_MOUSE  | Heterogeneous nuclear ribonucleoprotein F;                                         | -0.78 | 0.4481 |
| PIN1_MOUSE   | Phospholipase A-2-activating protein;                                              | -0.47 | 0.4484 |
| Q3U8X1_MOUSE | Putative uncharacterized protein;                                                  | 1.22  | 0.4491 |
| Q3TFA5_MOUSE | Putative uncharacterized protein;                                                  | 0.35  | 0.4493 |
| PIMT_MOUSE   | Junction plakoglobin;                                                              | -0.35 | 0.4494 |
| FBLL1_MOUSE  | rRNA/tRNA 2'-O-methyltransferase fibrillarin-like protein 1;                       | -0.58 | 0.4501 |
| NDUA8_MOUSE  | NADH dehydrogenase [ubiquinone] 1 alpha subcomplex subunit 8;                      | -0.21 | 0.4505 |
| 1433F_MOUSE  | 14-3-3 protein eta;                                                                | 0.47  | 0.451  |
| NIBAN_MOUSE  | Protein Niban;                                                                     | 0.00  | 0.4511 |
| ACAD8_MOUSE  | Isobutyryl-CoA dehydrogenase, mitochondrial;                                       | 1.32  | 0.4516 |
| MYH3_MOUSE   | Myosin-3;                                                                          | 0.32  | 0.4518 |
| Q2VPC8_MOUSE | Tacc2 protein;                                                                     | -1.00 | 0.4527 |
| FRDA_MOUSE   | Frataxin, mitochondrial;                                                           | 0.00  | 0.4533 |

|              |                                                                                                            |       |        |
|--------------|------------------------------------------------------------------------------------------------------------|-------|--------|
| VAMP2_MOUSE  | Vesicle-associated membrane protein 2;                                                                     | 2.00  | 0.4547 |
| GNAS1_MOUSE  | Guanine nucleotide-binding protein G(s) subunit alpha isoforms XLas;                                       | 0.58  | 0.4563 |
| MCAT_MOUSE   | Mitochondrial carnitine/acylcarnitine carrier protein;                                                     | 0.26  | 0.4572 |
| B8JIM5_MOUSE | LYR motif containing 7;                                                                                    | 0.11  | 0.4574 |
| JIP3_MOUSE   | C-Jun-amino-terminal kinase-interacting protein 3;                                                         | -0.74 | 0.4575 |
| CHCH2_MOUSE  | Coiled-coil-helix-coiled-coil-helix domain-containing protein 2, mitochondrial;                            | 0.49  | 0.4576 |
| ROAA_MOUSE   | Heterogeneous nuclear ribonucleoprotein A/B;                                                               | -0.24 | 0.4578 |
| 4F2_MOUSE    | 4F2 cell-surface antigen heavy chain;                                                                      | 1.58  | 0.458  |
| ENPP6_MOUSE  | Ectonucleotide pyrophosphatase/phosphodiesterase family member 6;                                          | 1.58  | 0.458  |
| PSB7_MOUSE   | Proteasome subunit beta type-7;                                                                            | 1.00  | 0.4601 |
| Q9QZV4_MOUSE | Histidine-rich Ca2+ binding protein;                                                                       | -0.37 | 0.4607 |
| Q3UJU1_MOUSE | Methylmalonyl-Coenzyme A mutase;                                                                           | 0.58  | 0.4608 |
| Q3TFS0_MOUSE | Carnitine palmitoyltransferase 2;                                                                          | 1.58  | 0.4624 |
| DNJA2_MOUSE  | DnaJ homolog subfamily A member 2;                                                                         | -0.44 | 0.4636 |
| YJ005_MOUSE  | Uncharacterized protein FLJ45252 homolog;                                                                  | 1.58  | 0.4639 |
| Q3UER8_MOUSE | Putative uncharacterized protein;                                                                          | -0.45 | 0.4643 |
| FAD1_MOUSE   | FAD synthase;                                                                                              | 1.58  | 0.4664 |
| CBR4_MOUSE   | Carbonyl reductase family member 4;                                                                        | -0.58 | 0.4665 |
| 1433G_MOUSE  | 14-3-3 protein gamma;                                                                                      | 0.25  | 0.4669 |
| BOLA3_MOUSE  | BolA-like protein 3;                                                                                       | -0.74 | 0.4674 |
| ATPO_MOUSE   | ATP synthase subunit O, mitochondrial;                                                                     | 0.13  | 0.4687 |
| PYGB_MOUSE   | Glycogen phosphorylase, brain form;                                                                        | 0.17  | 0.4696 |
| TRXR1_MOUSE  | Thioredoxin reductase 1, cytoplasmic;                                                                      | -0.55 | 0.47   |
| FBRL_MOUSE   | rRNA 2'-O-methyltransferase fibrillar;                                                                     | -0.58 | 0.4705 |
| ATPD_MOUSE   | ATP synthase subunit delta, mitochondrial;                                                                 | 0.25  | 0.471  |
| ACOX1_MOUSE  | Peroxisomal acyl-coenzyme A oxidase 1;                                                                     | -0.07 | 0.4724 |
| UN45B_MOUSE  | Protein unc-45 homolog B;                                                                                  | 0.46  | 0.4724 |
| A8CVP1_MOUSE | LIM and senescent cell antigen-like domains 1 isoform D;                                                   | -0.58 | 0.4738 |
| PDXK_MOUSE   | Astrocytic phosphoprotein PEA-15;                                                                          | -1.00 | 0.4766 |
| CX4NB_MOUSE  | Neighbor of COX4;                                                                                          | 1.32  | 0.4771 |
| SEPT2_MOUSE  | Septin-2;                                                                                                  | -0.24 | 0.4774 |
| S12A7_MOUSE  | Solute carrier family 12 member 7;                                                                         | 0.49  | 0.4778 |
| EIF3A_MOUSE  | Eukaryotic translation initiation factor 3 subunit A;                                                      | 1.00  | 0.478  |
| ODP2_MOUSE   | Dihydropyridyllysine-residue acetyltransferase component of pyruvate dehydrogenase complex, mitochondrial; | 0.07  | 0.4792 |
| PLCD1_MOUSE  | Platelet factor 4;                                                                                         | -0.58 | 0.4792 |
| ITA7_MOUSE   | Integrin alpha-7;                                                                                          | 1.32  | 0.4796 |
| PC4L1_MOUSE  | Purkinje cell protein 4-like protein 1;                                                                    | -0.71 | 0.4809 |
| ACL6A_MOUSE  | Actin-like protein 6A;                                                                                     | -0.58 | 0.4816 |
| Q91YU9_MOUSE | Prdx5 protein;                                                                                             | -0.81 | 0.4818 |
| ATP5L_MOUSE  | ATP synthase subunit g, mitochondrial;                                                                     | 0.09  | 0.4833 |
| RL10L_MOUSE  | 60S ribosomal protein L10-like;                                                                            | -0.07 | 0.4838 |
| P20D2_MOUSE  | Peptidase M20 domain-containing protein 2;                                                                 | -0.70 | 0.484  |
| NOL3_MOUSE   | Nucleolar protein 3;                                                                                       | -0.37 | 0.4841 |
| TPM1_MOUSE   | Tropomyosin alpha-1 chain;                                                                                 | -0.24 | 0.4849 |
| MARCS_MOUSE  | Myristoylated alanine-rich C-kinase substrate;                                                             | 0.56  | 0.4864 |
| RS15_MOUSE   | 40S ribosomal protein S15;                                                                                 | -0.47 | 0.4865 |
| VP37C_MOUSE  | Vacuolar protein sorting-associated protein 37C;                                                           | -1.00 | 0.4868 |

|              |                                                                                 |       |        |
|--------------|---------------------------------------------------------------------------------|-------|--------|
| TCTP_MOUSE   | Translationally-controlled tumor protein;                                       | -0.13 | 0.4874 |
| MACD1_MOUSE  | MACRO domain-containing protein 1;                                              | -0.35 | 0.4875 |
| Q3TWD1_MOUSE | Putative uncharacterized protein;                                               | -0.42 | 0.4882 |
| ATOX1_MOUSE  | Copper transport protein ATOX1;                                                 | 0.28  | 0.4883 |
| A2RTH5_MOUSE | Leucine carboxyl methyltransferase 1;                                           | -1.58 | 0.4884 |
| MUP1_MOUSE   | Major urinary protein 1;                                                        | 0.58  | 0.4893 |
| EIF3I_MOUSE  | Eukaryotic translation initiation factor 3 subunit I;                           | -1.32 | 0.4901 |
| CHCH3_MOUSE  | Coiled-coil-helix-coiled-coil-helix domain-containing protein 3, mitochondrial; | 0.40  | 0.4903 |
| DBNL_MOUSE   | Drebrin-like protein;                                                           | -0.91 | 0.4904 |
| GBG5_MOUSE   | Guanine nucleotide-binding protein G(I)/G(S)/G(O) subunit gamma-5;              | 1.00  | 0.4906 |
| GRP75_MOUSE  | Stress-70 protein, mitochondrial;                                               | -0.24 | 0.4908 |
| PER1_MOUSE   | Peroxisomal membrane protein PEX14;                                             | 0.58  | 0.4915 |
| MSRB2_MOUSE  | Methionine-R-sulfoxide reductase B2, mitochondrial;                             | 0.81  | 0.4919 |
| PLMN_MOUSE   | Plastin-2;                                                                      | 0.77  | 0.4927 |
| MYL4_MOUSE   | Myosin light chain 4;                                                           | 0.58  | 0.4929 |
| PEPL1_MOUSE  | Peripherin;                                                                     | -0.74 | 0.4932 |
| HSPB8_MOUSE  | Heat shock protein beta-7;                                                      | -0.46 | 0.4953 |
| SCOC_MOUSE   | Short coiled-coil protein;                                                      | -0.87 | 0.4963 |
| MESD_MOUSE   | LDLR chaperone MESD;                                                            | -0.58 | 0.4965 |
| FUND2_MOUSE  | FUN14 domain-containing protein 2;                                              | -1.00 | 0.4993 |
| BIEA_MOUSE   | Biliverdin reductase A;                                                         | -0.68 | 0.4995 |
| Q6JIZ0_MOUSE | Acetyl-CoA carboxylase 2;                                                       | -1.58 | 0.5006 |
| RL19_MOUSE   | 60S ribosomal protein L19;                                                      | 0.65  | 0.5006 |
| RAB2A_MOUSE  | Ras-related protein Rab-2A;                                                     | 1.42  | 0.5009 |
| IF4A2_MOUSE  | Eukaryotic initiation factor 4A-II;                                             | -1.00 | 0.5019 |
| CO4B_MOUSE   | Complement C4-B;                                                                | -0.47 | 0.5036 |
| Q9CUJ9_MOUSE | Putative uncharacterized protein;                                               | -1.00 | 0.5041 |
| SNX27_MOUSE  | Sorting nexin-27;                                                               | -1.00 | 0.5051 |
| CALX_MOUSE   | Calnexin;                                                                       | 0.64  | 0.506  |
| ALDOC_MOUSE  | Fructose-bisphosphate aldolase C;                                               | -0.51 | 0.507  |
| LCAP_MOUSE   | Leucyl-cystinyl aminopeptidase;                                                 | -0.13 | 0.5095 |
| DMD_MOUSE    | Dystrophin;                                                                     | 1.58  | 0.5102 |
| FKBP3_MOUSE  | Peptidyl-prolyl cis-trans isomerase FKBP3;                                      | -0.26 | 0.5121 |
| Q60638_MOUSE | Microtubule-associated protein 4;                                               | -0.46 | 0.5126 |
| Q3UJG4_MOUSE | Putative uncharacterized protein;                                               | -0.42 | 0.5135 |
| ERP44_MOUSE  | Endoplasmic reticulum resident protein 44;                                      | 0.42  | 0.5138 |
| IGHM_MOUSE   | Ig mu chain C region secreted form;                                             | -1.17 | 0.5141 |
| IMB1_MOUSE   | Importin subunit beta-1;                                                        | -0.30 | 0.5146 |
| GRPE1_MOUSE  | GrpE protein homolog 1, mitochondrial;                                          | -1.58 | 0.5154 |
| NDUS6_MOUSE  | NADH dehydrogenase [ubiquinone] iron-sulfur protein 6, mitochondrial;           | -0.22 | 0.5167 |
| CISD1_MOUSE  | CDGSH iron-sulfur domain-containing protein 1;                                  | -0.15 | 0.5192 |
| CYBP_MOUSE   | Calcyclin-binding protein;                                                      | -0.50 | 0.5193 |
| GDIR1_MOUSE  | Rho GDP-dissociation inhibitor 1;                                               | 0.19  | 0.5212 |
| P5CR3_MOUSE  | Pyrroline-5-carboxylate reductase 3;                                            | -1.00 | 0.5212 |
| UB2FA_MOUSE  | NEDD8-conjugating enzyme UBE2F;                                                 | 0.68  | 0.5222 |
| ARCH_MOUSE   | Protein archease;                                                               | 0.65  | 0.5228 |
| ES1_MOUSE    | ES1 protein homolog, mitochondrial;                                             | -0.31 | 0.5235 |

|              |                                                                             |       |        |
|--------------|-----------------------------------------------------------------------------|-------|--------|
| SAR1A_MOUSE  | GTP-binding protein SAR1a;                                                  | 0.42  | 0.5249 |
| ZADH2_MOUSE  | Zinc-binding alcohol dehydrogenase domain-containing protein 2;             | -0.78 | 0.5255 |
| IF2A_MOUSE   | Eukaryotic translation initiation factor 2 subunit 1;                       | -0.42 | 0.5256 |
| RGPA1_MOUSE  | Ral GTPase-activating protein subunit alpha-1;                              | -1.00 | 0.5256 |
| CLPB_MOUSE   | Caseinolytic peptidase B protein homolog;                                   | -0.58 | 0.5266 |
| NDUS8_MOUSE  | NADH dehydrogenase [ubiquinone] iron-sulfur protein 8, mitochondrial;       | -0.60 | 0.527  |
| SPA3C_MOUSE  | Serine protease inhibitor A3C;                                              | -0.26 | 0.5275 |
| NUB1_MOUSE   | NEDD8 ultimate buster 1;                                                    | -0.58 | 0.5281 |
| SYIC_MOUSE   | Isoleucyl-tRNA synthetase, cytoplasmic;                                     | -1.00 | 0.5282 |
| UBP5_MOUSE   | Ubiquitin carboxyl-terminal hydrolase 5;                                    | -0.21 | 0.5283 |
| MPKS1_MOUSE  | Mannose-6-phosphate isomerase;                                              | 0.74  | 0.5284 |
| ARF4_MOUSE   | ADP-ribosylation factor 4;                                                  | -1.00 | 0.529  |
| GSTP1_MOUSE  | Glutathione S-transferase P 1;                                              | -0.29 | 0.5293 |
| MCTS1_MOUSE  | Malignant T cell-amplified sequence 1;                                      | -1.00 | 0.5293 |
| ECHB_MOUSE   | Trifunctional enzyme subunit beta, mitochondrial;                           | -0.39 | 0.5297 |
| INO1_MOUSE   | Inositol-3-phosphate synthase 1;                                            | 0.29  | 0.5305 |
| PAK2_MOUSE   | Serine/threonine-protein kinase PAK 2;                                      | -1.00 | 0.5305 |
| QCR6_MOUSE   | Cytochrome b-c1 complex subunit 6, mitochondrial;                           | -0.39 | 0.5315 |
| TIGAR_MOUSE  | Probable fructose-2,6-bisphosphatase TIGAR;                                 | 0.32  | 0.5323 |
| AQP1_MOUSE   | Aquaporin-1;                                                                | 0.00  | 0.5325 |
| SH3L3_MOUSE  | SH3 domain-binding glutamic acid-rich-like protein 3;                       | 0.42  | 0.5331 |
| Q5BKS5_MOUSE | Hook homolog 3 (Drosophila);                                                | -0.58 | 0.5332 |
| LHPP_MOUSE   | Phospholysine phosphohistidine inorganic pyrophosphate phosphatase;         | -0.58 | 0.5336 |
| GDIA_MOUSE   | Rab GDP dissociation inhibitor alpha;                                       | 0.13  | 0.5343 |
| MFGM_MOUSE   | Lactadherin;                                                                | 1.58  | 0.5357 |
| G3BP1_MOUSE  | Ras GTPase-activating protein-binding protein 1;                            | 0.00  | 0.5362 |
| A6X935_MOUSE | Inter alpha-trypsin inhibitor, heavy chain 4;                               | 0.25  | 0.5365 |
| NDUB8_MOUSE  | NADH dehydrogenase [ubiquinone] 1 beta subcomplex subunit 8, mitochondrial; | 0.09  | 0.5371 |
| TCPH_MOUSE   | T-complex protein 1 subunit eta;                                            | -0.26 | 0.5402 |
| A2RSX9_MOUSE | Arfp1 protein;                                                              | 0.42  | 0.541  |
| KV3AA_MOUSE  | Ig kappa chain V-III region ABPC 22/PC 9245;                                | -0.58 | 0.541  |
| K6PP_MOUSE   | 6-phosphofructokinase type C;                                               | -0.62 | 0.5434 |
| PEPD_MOUSE   | Probable aminopeptidase NPEPL1;                                             | 0.42  | 0.5457 |
| ACYP2_MOUSE  | Acylphosphatase-2;                                                          | -0.32 | 0.546  |
| CHMP5_MOUSE  | Charged multivesicular body protein 5;                                      | 0.42  | 0.5464 |
| RS17_MOUSE   | 40S ribosomal protein S17;                                                  | 0.41  | 0.5466 |
| HN1_MOUSE    | Hematological and neurological expressed 1 protein;                         | 0.22  | 0.5479 |
| ACTN4_MOUSE  | Alpha-actinin-4;                                                            | -0.35 | 0.5493 |
| EDC4_MOUSE   | Enhancer of mRNA-decapping protein 4;                                       | 0.42  | 0.5515 |
| TTC35_MOUSE  | Tetratricopeptide repeat protein 35;                                        | 0.00  | 0.5518 |
| TOLIP_MOUSE  | Toll-interacting protein;                                                   | 0.39  | 0.5523 |
| TALDO_MOUSE  | Transaldolase;                                                              | 0.58  | 0.5536 |
| ACADM_MOUSE  | Medium-chain specific acyl-CoA dehydrogenase, mitochondrial;                | -0.40 | 0.5554 |
| SYUG_MOUSE   | Gamma-synuclein;                                                            | -1.00 | 0.5565 |
| PUR2_MOUSE   | Trifunctional purine biosynthetic protein adenosine-3;                      | -0.28 | 0.5573 |
| TCPA_MOUSE   | T-complex protein 1 subunit alpha;                                          | 0.62  | 0.5574 |
| ARP3_MOUSE   | Actin-related protein 3;                                                    | 0.37  | 0.5585 |

|              |                                                                       |       |        |
|--------------|-----------------------------------------------------------------------|-------|--------|
| RAB14_MOUSE  | Ras-related protein Rab-14;                                           | -0.24 | 0.5585 |
| SAHH_MOUSE   | Adenosylhomocysteinase;                                               | 0.47  | 0.5602 |
| DHB4_MOUSE   | Peroxisomal multifunctional enzyme type 2;                            | 0.39  | 0.5609 |
| TOM20_MOUSE  | Mitochondrial import receptor subunit TOM20 homolog;                  | 2.00  | 0.5625 |
| KAD1_MOUSE   | Adenylate kinase isoenzyme 1;                                         | 0.04  | 0.5637 |
| PBIP1_MOUSE  | Pre-B-cell leukemia transcription factor-interacting protein 1;       | -0.26 | 0.5648 |
| ABHDB_MOUSE  | Abhydrolase domain-containing protein 11;                             | 0.32  | 0.5649 |
| PSA5_MOUSE   | Proteasome subunit alpha type-5;                                      | 0.29  | 0.5651 |
| ANXA6_MOUSE  | Annexin A6;                                                           | 0.09  | 0.5683 |
| PHB2_MOUSE   | 14 kDa phosphohistidine phosphatase;                                  | -0.33 | 0.5689 |
| CLUS_MOUSE   | Clusterin;                                                            | -0.42 | 0.5691 |
| Q3TIN2_MOUSE | Putative uncharacterized protein;                                     | -1.00 | 0.5691 |
| SPTA1_MOUSE  | Spectrin alpha chain, erythrocyte;                                    | 0.75  | 0.57   |
| Q6ZWZ6_MOUSE | 40S ribosomal protein S12;                                            | -1.00 | 0.5711 |
| A2AGL3_MOUSE | Ryanodine receptor 3;                                                 | -1.00 | 0.5716 |
| AAPK2_MOUSE  | 5'-AMP-activated protein kinase catalytic subunit alpha-2;            | 0.49  | 0.5722 |
| ROA3_MOUSE   | Heterogeneous nuclear ribonucleoprotein A3;                           | -0.06 | 0.5724 |
| CA170_MOUSE  | Uncharacterized protein C1orf170 homolog;                             | -0.32 | 0.5726 |
| XDH_MOUSE    | Xanthine dehydrogenase/oxidase;                                       | -0.50 | 0.5733 |
| Q91XH5_MOUSE | Sepiapterin reductase;                                                | -0.22 | 0.5735 |
| SYNC_MOUSE   | Asparaginyl-tRNA synthetase, cytoplasmic;                             | 0.36  | 0.5756 |
| PRDX4_MOUSE  | Peroxiredoxin-6;                                                      | 1.00  | 0.5765 |
| PARM1_MOUSE  | Prostate androgen-regulated mucin-like protein 1 homolog;             | -1.00 | 0.5774 |
| ATPK_MOUSE   | ATP synthase subunit f, mitochondrial;                                | -0.25 | 0.5776 |
| PDP1_MOUSE   | Pyruvate dehydrogenase phosphatase regulatory subunit, mitochondrial; | -0.58 | 0.5807 |
| SRBS1_MOUSE  | Sorbin and SH3 domain-containing protein 1;                           | 0.58  | 0.5817 |
| ECHD3_MOUSE  | Enoyl-CoA hydratase domain-containing protein 3, mitochondrial;       | -2.58 | 0.582  |
| KINH_MOUSE   | Kinesin-1 heavy chain;                                                | 0.19  | 0.582  |
| MARE1_MOUSE  | Microtubule-associated protein RP/EB family member 1;                 | -0.49 | 0.5821 |
| Q3V046_MOUSE | Putative uncharacterized protein;                                     | 0.00  | 0.5836 |
| TPD54_MOUSE  | Tumor protein D54;                                                    | 0.15  | 0.5845 |
| GSH0_MOUSE   | Glutamate--cysteine ligase regulatory subunit;                        | -0.32 | 0.5849 |
| TPM4_MOUSE   | Tropomyosin alpha-4 chain;                                            | 0.32  | 0.5849 |
| HS74L_MOUSE  | Heat shock 70 kDa protein 4L;                                         | 0.32  | 0.5854 |
| PLF4_MOUSE   | Perilipin-3;                                                          | 1.32  | 0.5858 |
| Q9CY75_MOUSE | MCG4364, isoform CRA_b;                                               | 0.00  | 0.586  |
| GALM_MOUSE   | Aldose 1-epimerase;                                                   | 0.46  | 0.5863 |
| KCC2A_MOUSE  | Calcium/calmodulin-dependent protein kinase type II subunit alpha;    | 0.58  | 0.5872 |
| PMGE_MOUSE   | Purine nucleoside phosphorylase;                                      | -0.15 | 0.5872 |
| ASGL1_MOUSE  | L-asparaginase;                                                       | -1.32 | 0.5875 |
| G3P_MOUSE    | Glyceraldehyde-3-phosphate dehydrogenase;                             | 0.02  | 0.5877 |
| IF4G2_MOUSE  | Eukaryotic translation initiation factor 4 gamma 2;                   | -0.26 | 0.59   |
| PPAC_MOUSE   | Peptidyl-prolyl cis-trans isomerase B;                                | -0.65 | 0.5903 |
| UGPA_MOUSE   | UTP--glucose-1-phosphate uridylyltransferase;                         | 0.23  | 0.5904 |
| CSN2_MOUSE   | COP9 signalosome complex subunit 2;                                   | 0.42  | 0.5905 |
| VATA_MOUSE   | V-type proton ATPase catalytic subunit A;                             | 0.65  | 0.5926 |
| KCY_MOUSE    | UMP-CMP kinase;                                                       | -0.39 | 0.5931 |
| MYOZ2_MOUSE  | Myozenin-2;                                                           | -0.81 | 0.5939 |

|              |                                                               |       |        |
|--------------|---------------------------------------------------------------|-------|--------|
| ADT2_MOUSE   | ADP/ATP translocase 2;                                        | 0.42  | 0.5944 |
| PSDE_MOUSE   | 26S proteasome non-ATPase regulatory subunit 14;              | -0.58 | 0.5957 |
| ACLY_MOUSE   | ATP-citrate synthase;                                         | 0.26  | 0.5961 |
| ASB18_MOUSE  | Ankyrin repeat and SOCS box protein 18;                       | 0.00  | 0.5986 |
| SPA3M_MOUSE  | Serine protease inhibitor A3M;                                | -0.58 | 0.5991 |
| RAB7A_MOUSE  | Ras-related protein Rab-7a;                                   | 2.32  | 0.5994 |
| RENT1_MOUSE  | Regulator of nonsense transcripts 1;                          | -0.26 | 0.601  |
| ACY1_MOUSE   | Aminoacylase-1;                                               | -0.71 | 0.6041 |
| TLN2_MOUSE   | Talin-2;                                                      | -0.81 | 0.6045 |
| LAMC1_MOUSE  | Laminin subunit gamma-1;                                      | -0.19 | 0.6055 |
| CV028_MOUSE  | UPF0027 protein C22orf28 homolog;                             | -0.42 | 0.6056 |
| PURA1_MOUSE  | Adenylosuccinate synthetase isozyme 1;                        | 0.00  | 0.6059 |
| COR1B_MOUSE  | Coronin-1B;                                                   | -1.00 | 0.6064 |
| STIP1_MOUSE  | Stress-induced-phosphoprotein 1;                              | 0.19  | 0.6064 |
| FABP5_MOUSE  | Fatty acid-binding protein, epidermal;                        | -0.42 | 0.6075 |
| HMGCL_MOUSE  | Hydroxymethylglutaryl-CoA lyase, mitochondrial;               | 0.58  | 0.6077 |
| FA12_MOUSE   | Coagulation factor XII;                                       | 1.00  | 0.6079 |
| GPC1_MOUSE   | Glypican-1;                                                   | 0.63  | 0.6079 |
| MIF_MOUSE    | Macrophage migration inhibitory factor;                       | -0.58 | 0.6087 |
| PEBP1_MOUSE  | Platelet endothelial cell adhesion molecule;                  | -0.08 | 0.6092 |
| RL7A_MOUSE   | 60S ribosomal protein L7a;                                    | 0.40  | 0.6117 |
| PSA6_MOUSE   | Proteasome subunit alpha type-6;                              | 0.60  | 0.6123 |
| A2NW55_MOUSE | E8 variable heavy chain;                                      | 0.00  | 0.6132 |
| PRS4_MOUSE   | 26S protease regulatory subunit 6A;                           | -0.05 | 0.6139 |
| UBFD1_MOUSE  | Ubiquitin domain-containing protein UBFD1;                    | -0.58 | 0.6146 |
| IMA2_MOUSE   | Importin subunit alpha-2;                                     | 0.00  | 0.6147 |
| CPIN1_MOUSE  | Anamorsin;                                                    | 0.33  | 0.6153 |
| MYG_MOUSE    | Myoglobin;                                                    | -0.13 | 0.6156 |
| GUAA_MOUSE   | GMP synthase [glutamine-hydrolyzing];                         | -0.62 | 0.6157 |
| DHDH_MOUSE   | Trans-1,2-dihydrobenzene-1,2-diol dehydrogenase;              | -0.26 | 0.6179 |
| AAPK1_MOUSE  | 5'-AMP-activated protein kinase catalytic subunit alpha-1;    | 1.58  | 0.618  |
| CRK_MOUSE    | Adapter molecule crk;                                         | 0.22  | 0.6185 |
| STRAP_MOUSE  | Serine-threonine kinase receptor-associated protein;          | 0.42  | 0.6185 |
| COX17_MOUSE  | Cytochrome c oxidase copper chaperone;                        | 0.42  | 0.6187 |
| Q6DFX1_MOUSE | HEG homolog 1 (Zebrafish);                                    | 0.42  | 0.6191 |
| H2AV_MOUSE   | Histone H2A.V;                                                | -0.58 | 0.6207 |
| APOC2_MOUSE  | Apolipoprotein C-II;                                          | -0.49 | 0.621  |
| Q9CQ16_MOUSE | MCG2315, isoform CRA_b;                                       | 0.00  | 0.622  |
| RS3_MOUSE    | 40S ribosomal protein S3;                                     | 0.43  | 0.6221 |
| HYPK_MOUSE   | Hypoxia up-regulated protein 1;                               | 0.00  | 0.6225 |
| ATX2_MOUSE   | Ataxin-2;                                                     | -0.58 | 0.623  |
| LETM1_MOUSE  | LETM1 and EF-hand domain-containing protein 1, mitochondrial; | 0.22  | 0.6241 |
| NDUA4_MOUSE  | NADH dehydrogenase [ubiquinone] 1 alpha subcomplex subunit 4; | -0.32 | 0.6247 |
| STABP_MOUSE  | STAM-binding protein;                                         | 0.00  | 0.6265 |
| Q9CX86_MOUSE | Putative uncharacterized protein;                             | 0.00  | 0.6267 |
| DDB1_MOUSE   | DNA damage-binding protein 1;                                 | 0.42  | 0.6268 |
| MYOV2_MOUSE  | Myeloma-overexpressed gene 2 protein homolog;                 | -1.00 | 0.627  |
| RL7_MOUSE    | 60S ribosomal protein L7;                                     | 0.68  | 0.628  |

|              |                                                                     |       |        |
|--------------|---------------------------------------------------------------------|-------|--------|
| SAMP_MOUSE   | Serum amyloid P-component;                                          | -1.00 | 0.628  |
| CX6A2_MOUSE  | Cytochrome c oxidase subunit 6A2, mitochondrial;                    | 0.36  | 0.6305 |
| ELOC_MOUSE   | Transcription elongation factor B polypeptide 1;                    | 0.16  | 0.6309 |
| CERU_MOUSE   | Ceruloplasmin;                                                      | 0.11  | 0.6314 |
| KV5A6_MOUSE  | Ig kappa chain V-V region L6;                                       | -0.58 | 0.6314 |
| SERHL_MOUSE  | Serine hydrolase-like protein;                                      | 0.74  | 0.6314 |
| PUR6_MOUSE   | Multifunctional protein ADE2;                                       | -0.50 | 0.6341 |
| SFRS1_MOUSE  | Splicing factor, arginine/serine-rich 1;                            | 1.00  | 0.6342 |
| TBA4A_MOUSE  | Tubulin alpha-4A chain;                                             | 0.36  | 0.6363 |
| DNM1L_MOUSE  | Dynamin-1-like protein;                                             | -0.22 | 0.6368 |
| ASNA_MOUSE   | ATPase Asna1;                                                       | 0.42  | 0.6396 |
| HBB1_MOUSE   | Hemoglobin subunit beta-1;                                          | -0.14 | 0.6408 |
| LIMC1_MOUSE  | LIM and calponin homology domains-containing protein 1;             | -0.12 | 0.6427 |
| ABCD3_MOUSE  | ATP-binding cassette sub-family D member 3;                         | -1.00 | 0.6437 |
| KCC1A_MOUSE  | Calcium/calmodulin-dependent protein kinase type 1;                 | 0.58  | 0.6454 |
| SNX3_MOUSE   | Sorting nexin-3;                                                    | -0.58 | 0.6463 |
| LYPA1_MOUSE  | Acyl-protein thioesterase 1;                                        | 0.58  | 0.647  |
| LKHA4_MOUSE  | Leukotriene A-4 hydrolase;                                          | -0.28 | 0.6479 |
| NDKA_MOUSE   | Nucleoside diphosphate kinase A;                                    | 0.01  | 0.6479 |
| GBG12_MOUSE  | Guanine nucleotide-binding protein G(I)/G(S)/G(O) subunit gamma-12; | 0.42  | 0.6484 |
| RS2_MOUSE    | 40S ribosomal protein S2                                            | 0.11  | 0.6489 |
| BAF_MOUSE    | Barrier-to-autointegration factor;                                  | 0.00  | 0.6492 |
| RT36_MOUSE   | 28S ribosomal protein S36, mitochondrial;                           | 0.16  | 0.6493 |
| NOP56_MOUSE  | Nucleolar protein 56;                                               | 0.58  | 0.6494 |
| PSB6_MOUSE   | Proteasome subunit beta type-6;                                     | -0.82 | 0.6495 |
| IF2B_MOUSE   | Eukaryotic translation initiation factor 2 subunit 2;               | -0.74 | 0.6499 |
| MAPK2_MOUSE  | MAP kinase-activated protein kinase 2;                              | 0.42  | 0.6499 |
| NAA50_MOUSE  | N-alpha-acetyltransferase 50, NatE catalytic subunit;               | 0.00  | 0.6501 |
| MACF1_MOUSE  | Microtubule-actin cross-linking factor 1;                           | -0.58 | 0.6511 |
| H4_MOUSE     | Histone H4;                                                         | 0.30  | 0.6526 |
| A2AIX1_MOUSE | SEC16 homolog A (S. cerevisiae);                                    | -1.22 | 0.6527 |
| HNRH1_MOUSE  | Heterogeneous nuclear ribonucleoprotein H;                          | 0.13  | 0.6548 |
| XPO2_MOUSE   | Exportin-2;                                                         | 0.32  | 0.6553 |
| B7ZNQ1_MOUSE | Trk-fused gene;                                                     | -0.49 | 0.6579 |
| GOGA3_MOUSE  | Golgin subfamily A member 3;                                        | 0.85  | 0.6582 |
| AMPB_MOUSE   | Aminopeptidase B;                                                   | 0.00  | 0.6596 |
| MA2B2_MOUSE  | Epididymis-specific alpha-mannosidase;                              | 1.32  | 0.6596 |
| KPYM_MOUSE   | Pyruvate kinase isozymes M1/M2;                                     | -0.30 | 0.6603 |
| FLNC_MOUSE   | Filamin-C;                                                          | -0.03 | 0.6607 |
| PSA_MOUSE    | Puromycin-sensitive aminopeptidase;                                 | -0.44 | 0.6608 |
| CSN8_MOUSE   | COP9 signalosome complex subunit 8;                                 | -0.34 | 0.6638 |
| U566_MOUSE   | UPF0566 protein;                                                    | 0.74  | 0.6652 |
| Q8C6Y2_MOUSE | Putative uncharacterized protein;                                   | 0.26  | 0.6657 |
| CRYL1_MOUSE  | Lambda-crystallin homolog;                                          | -0.42 | 0.6659 |
| Q8BIV6_MOUSE | Putative uncharacterized protein;                                   | 0.14  | 0.6683 |
| OLA1_MOUSE   | Obg-like ATPase 1                                                   | 0.17  | 0.6724 |
| B3AT_MOUSE   | Band 3 anion transport protein;                                     | -0.03 | 0.6725 |
| APOC3_MOUSE  | Apolipoprotein C-III;                                               | 0.14  | 0.6739 |



|             |                                                                                         |       |        |
|-------------|-----------------------------------------------------------------------------------------|-------|--------|
| CO6A1_MOUSE | Collagen alpha-1(VI) chain;                                                             | 0.38  | 0.6742 |
| RLA2_MOUSE  | 60S acidic ribosomal protein P2;                                                        | 0.55  | 0.6744 |
| DOHH_MOUSE  | Deoxyhypusine hydroxylase;                                                              | 0.00  | 0.6745 |
| PSA1_MOUSE  | Proteasome subunit alpha type-1;                                                        | 0.00  | 0.6755 |
| BT3L4_MOUSE | Transcription factor BTF3 homolog 4;                                                    | 0.38  | 0.6757 |
| CRKL_MOUSE  | Crk-like protein;                                                                       | 0.00  | 0.6758 |
| AP2B1_MOUSE | AP-2 complex subunit beta;                                                              | 0.22  | 0.6761 |
| CAH2_MOUSE  | Carbonic anhydrase 2;                                                                   | -0.13 | 0.6762 |
| AT1A1_MOUSE | Sodium/potassium-transporting ATPase subunit alpha-1;                                   | 0.08  | 0.6775 |
| ATRAP_MOUSE | Type-1 angiotensin II receptor-associated protein;                                      | 0.00  | 0.6777 |
| NDUB4_MOUSE | NADH dehydrogenase [ubiquinone] 1 beta subcomplex subunit 4;                            | 0.23  | 0.6781 |
| SYSC_MOUSE  | Seryl-tRNA synthetase, cytoplasmic;                                                     | -0.30 | 0.6782 |
| PSPC1_MOUSE | Paraspeckle component 1;                                                                | -1.00 | 0.6783 |
| EIF3M_MOUSE | Eukaryotic translation initiation factor 3 subunit M;                                   | -0.19 | 0.6786 |
| TSN_MOUSE   | Translin;                                                                               | 0.00  | 0.6796 |
| ADCK1_MOUSE | Uncharacterized aarF domain-containing protein kinase 1;                                | 1.58  | 0.6798 |
| PCY2_MOUSE  | Prenylcysteine oxidase;                                                                 | 0.58  | 0.682  |
| RSSA_MOUSE  | 40S ribosomal protein SA;                                                               | 0.21  | 0.6825 |
| DHSB_MOUSE  | Succinate dehydrogenase [ubiquinone] iron-sulfur subunit, mitochondrial;                | -0.03 | 0.6826 |
| S10A1_MOUSE | Protein S100-A1;                                                                        | -0.21 | 0.6839 |
| OCAD1_MOUSE | OCIA domain-containing protein 1;                                                       | 0.29  | 0.6868 |
| SMD1_MOUSE  | Small nuclear ribonucleoprotein Sm D1                                                   | -0.42 | 0.6875 |
| CFAD_MOUSE  | Complement factor D;                                                                    | -1.00 | 0.6893 |
| ODPAT_MOUSE | Pyruvate dehydrogenase E1 component subunit alpha, testis-specific form, mitochondrial; | 0.63  | 0.6911 |
| KPB1_MOUSE  | Phosphorylase b kinase regulatory subunit alpha, skeletal muscle isoform;               | 0.00  | 0.6928 |
| SYRC_MOUSE  | Arginyl-tRNA synthetase, cytoplasmic;                                                   | 0.42  | 0.6933 |
| PSD13_MOUSE | 26S proteasome non-ATPase regulatory subunit 13;                                        | -0.35 | 0.6945 |
| MPCP_MOUSE  | Phosphate carrier protein, mitochondrial;                                               | -0.42 | 0.6946 |
| ANX11_MOUSE | Annexin A11;                                                                            | -0.51 | 0.6955 |
| RL32_MOUSE  | 60S ribosomal protein L32;                                                              | 0.07  | 0.6957 |
| UB2G1_MOUSE | Ubiquitin-conjugating enzyme E2 G1;                                                     | 0.00  | 0.6958 |
| TMOD1_MOUSE | Tropomodulin-1;                                                                         | -0.38 | 0.6961 |
| RTN2_MOUSE  | Reticulon-2;                                                                            | -0.42 | 0.6973 |
| AASD1_MOUSE | Alanyl-tRNA editing protein Aarsd1;                                                     | -0.42 | 0.6985 |
| CPNE3_MOUSE | Copine-3;                                                                               | 0.00  | 0.6993 |
| APT_MOUSE   | Adenine phosphoribosyltransferase;                                                      | 0.42  | 0.6998 |
| ODPA_MOUSE  | Pyruvate dehydrogenase E1 component subunit alpha, somatic form, mitochondrial;         | -0.16 | 0.7003 |
| PRS8_MOUSE  | 26S protease regulatory subunit 8;                                                      | -0.17 | 0.7035 |
| SPSY_MOUSE  | Spermine synthase;                                                                      | -0.09 | 0.7041 |
| GCP60_MOUSE | Golgi resident protein GCP60;                                                           | 0.00  | 0.7043 |
| CAPG_MOUSE  | Macrophage-capping protein;                                                             | 0.74  | 0.7055 |
| F174B_MOUSE | Membrane protein FAM174B;                                                               | 0.00  | 0.7059 |
| APOO_MOUSE  | Apolipoprotein O;                                                                       | 0.00  | 0.7073 |
| 2ABA_MOUSE  | Serine/threonine-protein phosphatase 2A 55 kDa regulatory subunit B alpha isoform;      | -0.36 | 0.7079 |
| CF142_MOUSE | Uncharacterized protein C6orf142 homolog;                                               | -1.58 | 0.7103 |
| NDRG1_MOUSE | Protein NDRG1;                                                                          | 1.00  | 0.7107 |

|              |                                                                                                                  |       |        |
|--------------|------------------------------------------------------------------------------------------------------------------|-------|--------|
| Q3TA69_MOUSE | Putative uncharacterized protein;                                                                                | -0.58 | 0.7114 |
| PREP_MOUSE   | Profilin-2;                                                                                                      | 0.00  | 0.7115 |
| AIBP_MOUSE   | Apolipoprotein A-I-binding protein;                                                                              | -0.15 | 0.7131 |
| PTBP1_MOUSE  | Polypyrimidine tract-binding protein 1;                                                                          | -0.51 | 0.7138 |
| FETUA_MOUSE  | Alpha-2-HS-glycoprotein;                                                                                         | -0.14 | 0.714  |
| EEA1_MOUSE   | Early endosome antigen 1;                                                                                        | 0.26  | 0.7156 |
| DIAP1_MOUSE  | Protein diaphanous homolog 1;                                                                                    | 0.00  | 0.7171 |
| HINT1_MOUSE  | Histidine triad nucleotide-binding protein 1;                                                                    | -0.17 | 0.7175 |
| MUG1_MOUSE   | Murinoglobulin-1;                                                                                                | -0.29 | 0.7178 |
| Q3TMN1_MOUSE | Methionine aminopeptidase;                                                                                       | -1.00 | 0.7186 |
| ABEC2_MOUSE  | Probable C->U-editing enzyme APOBEC-2;                                                                           | -0.22 | 0.7196 |
| SPA3A_MOUSE  | Serine protease inhibitor A3A;                                                                                   | 0.00  | 0.7196 |
| D39U1_MOUSE  | Epimerase family protein SDR39U1;                                                                                | 0.00  | 0.7228 |
| GLGB_MOUSE   | 1,4-alpha-glucan-branching enzyme;                                                                               | -0.42 | 0.7254 |
| DCUP_MOUSE   | Uroporphyrinogen decarboxylase;                                                                                  | 0.00  | 0.7264 |
| Q91WP8_MOUSE | NADH dehydrogenase (Ubiquinone) flavoprotein 3;                                                                  | 0.49  | 0.7265 |
| Q8K159_MOUSE | Itih1 protein;                                                                                                   | 0.30  | 0.7268 |
| ODO2_MOUSE   | Dihydrolipoylysine-residue succinyltransferase component of 2-oxoglutarate dehydrogenase complex, mitochondrial; | 0.08  | 0.7269 |
| RL6_MOUSE    | 60S ribosomal protein L6;                                                                                        | 0.45  | 0.7272 |
| TGM2_MOUSE   | Protein-glutamine gamma-glutamyltransferase 2;                                                                   | -0.05 | 0.7277 |
| CBG_MOUSE    | Corticosteroid-binding globulin;                                                                                 | -0.32 | 0.7284 |
| B1AXW8_MOUSE | Perlecan (Heparan sulfate proteoglycan 2);                                                                       | 0.00  | 0.73   |
| EPN1_MOUSE   | Epsin-1;                                                                                                         | 0.00  | 0.7318 |
| TPP1_MOUSE   | Tripeptidyl-peptidase 1;                                                                                         | -0.03 | 0.7321 |
| CHRD1_MOUSE  | Cysteine and histidine-rich domain-containing protein 1;                                                         | -0.32 | 0.7323 |
| PSA7L_MOUSE  | Proteasome subunit alpha type-7-like;                                                                            | 0.05  | 0.7354 |
| CD81_MOUSE   | CD81 antigen;                                                                                                    | 0.38  | 0.7355 |
| ILK_MOUSE    | Integrin-linked protein kinase;                                                                                  | 0.32  | 0.7355 |
| RM10_MOUSE   | 39S ribosomal protein L10, mitochondrial;                                                                        | 0.00  | 0.737  |
| COPB2_MOUSE  | Coatomer subunit beta';                                                                                          | 0.58  | 0.738  |
| DNJA3_MOUSE  | DnaJ homolog subfamily A member 3, mitochondrial;                                                                | -0.74 | 0.7391 |
| PYGL_MOUSE   | Glycogen phosphorylase, liver form;                                                                              | -0.13 | 0.7417 |
| HDHD2_MOUSE  | Haloacid dehalogenase-like hydrolase domain-containing protein 2;                                                | -0.36 | 0.7423 |
| PROSC_MOUSE  | 26S protease regulatory subunit 10B;                                                                             | 0.07  | 0.7432 |
| QCR2_MOUSE   | Cytochrome b-c1 complex subunit 2, mitochondrial;                                                                | -0.11 | 0.7441 |
| Q9CZK9_MOUSE | Peptidyl-prolyl cis-trans isomerase;                                                                             | -0.07 | 0.7446 |
| COQ3_MOUSE   | Hexaprenyldihydroxybenzoate methyltransferase, mitochondrial;                                                    | 0.17  | 0.7451 |
| IVD_MOUSE    | Isovaleryl-CoA dehydrogenase, mitochondrial;                                                                     | -0.45 | 0.7456 |
| IPYR_MOUSE   | Inorganic pyrophosphatase;                                                                                       | -0.06 | 0.7457 |
| FSCN1_MOUSE  | Fascin;                                                                                                          | 0.00  | 0.7474 |
| ARC1A_MOUSE  | Actin-related protein 2/3 complex subunit 1A;                                                                    | -0.49 | 0.7481 |
| C560_MOUSE   | Succinate dehydrogenase cytochrome b560 subunit, mitochondrial;                                                  | 0.00  | 0.7483 |
| IF2P_MOUSE   | Eukaryotic translation initiation factor 5B;                                                                     | -0.58 | 0.7492 |
| AT12A_MOUSE  | Potassium-transporting ATPase alpha chain 2;                                                                     | 0.74  | 0.7496 |
| DDX3L_MOUSE  | Putative ATP-dependent RNA helicase P110;                                                                        | 0.00  | 0.7496 |
| CIP4_MOUSE   | Cdc42-interacting protein 4;                                                                                     | 0.00  | 0.7497 |
| NSMA_MOUSE   | Sphingomyelin phosphodiesterase 2;                                                                               | 0.00  | 0.7507 |

|              |                                                                              |       |        |
|--------------|------------------------------------------------------------------------------|-------|--------|
| COQ5_MOUSE   | Ubiquinone biosynthesis methyltransferase COQ5, mitochondrial;               | 0.32  | 0.7515 |
| PYC_MOUSE    | Pyruvate carboxylase, mitochondrial;                                         | -0.32 | 0.7521 |
| TBCB_MOUSE   | Tubulin-folding cofactor B;                                                  | -0.68 | 0.7531 |
| K6PL_MOUSE   | 6-phosphofructokinase, liver type;                                           | 0.16  | 0.7537 |
| AMPL_MOUSE   | Cytosol aminopeptidase;                                                      | 0.04  | 0.7544 |
| A2AIM7_MOUSE | Talin 1;                                                                     | -1.00 | 0.7545 |
| PDLI5_MOUSE  | [Pyruvate dehydrogenase [acetyl-transferring]]-phosphatase 1, mitochondrial; | 0.65  | 0.7548 |
| A6ZI47_MOUSE | Fructose-bisphosphate aldolase;                                              | -0.58 | 0.7568 |
| PRUNE_MOUSE  | Protein prune homolog;                                                       | -0.26 | 0.757  |
| PDK1_MOUSE   | [Pyruvate dehydrogenase [lipoamide]] kinase isozyme 2, mitochondrial;        | 0.62  | 0.7577 |
| BTF3_MOUSE   | Transcription factor BTF3;                                                   | -0.21 | 0.759  |
| DUS3_MOUSE   | Dual specificity protein phosphatase 3;                                      | 0.07  | 0.7595 |
| C10_MOUSE    | Protein C10;                                                                 | -0.58 | 0.7624 |
| NCOAT_MOUSE  | Bifunctional protein NCOAT;                                                  | 0.42  | 0.7625 |
| ADPRH_MOUSE  | [Protein ADP-ribosylarginine] hydrolase;                                     | 0.32  | 0.7629 |
| GDIB_MOUSE   | Rab GDP dissociation inhibitor beta;                                         | 0.16  | 0.7663 |
| MUC20_MOUSE  | Mucin-20;                                                                    | 0.58  | 0.7668 |
| PCP_MOUSE    | Ethanolamine-phosphate cytidyltransferase;                                   | 0.58  | 0.7674 |
| RAB1B_MOUSE  | Ras-related protein Rab-1B;                                                  | 0.28  | 0.7677 |
| S2542_MOUSE  | Solute carrier family 25 member 42;                                          | 0.58  | 0.7685 |
| NDUBA_MOUSE  | NADH dehydrogenase [ubiquinone] 1 beta subcomplex subunit 10;                | -0.08 | 0.7689 |
| NAGAB_MOUSE  | Alpha-N-acetylgalactosaminidase;                                             | 0.74  | 0.769  |
| VP26A_MOUSE  | Vacuolar protein sorting-associated protein 26A;                             | 0.00  | 0.7693 |
| JIP4_MOUSE   | C-Jun-amino-terminal kinase-interacting protein 4;                           | -0.25 | 0.7701 |
| RS24_MOUSE   | 40S ribosomal protein S24;                                                   | 0.42  | 0.7705 |
| TIM44_MOUSE  | Mitochondrial import inner membrane translocase subunit TIM44;               | 0.00  | 0.7714 |
| HBE_MOUSE    | Hemoglobin subunit epsilon-Y2;                                               | 0.00  | 0.7725 |
| MFAP4_MOUSE  | Microfibril-associated glycoprotein 4;                                       | 0.22  | 0.7726 |
| MYH6_MOUSE   | Myosin-6;                                                                    | 0.03  | 0.7727 |
| GSLG1_MOUSE  | Golgi apparatus protein 1;                                                   | 0.33  | 0.7729 |
| AT1A4_MOUSE  | Sodium/potassium-transporting ATPase subunit alpha-4;                        | -0.42 | 0.7745 |
| Q9D6T9_MOUSE | Putative uncharacterized protein;                                            | -0.49 | 0.7745 |
| UCRI_MOUSE   | Cytochrome b-c1 complex subunit Rieske, mitochondrial;                       | 0.07  | 0.7745 |
| NDUS4_MOUSE  | NADH dehydrogenase [ubiquinone] iron-sulfur protein 4, mitochondrial;        | 0.00  | 0.7763 |
| ACSF3_MOUSE  | Acyl-CoA synthetase family member 3, mitochondrial;                          | 0.00  | 0.7775 |
| HMOX2_MOUSE  | Heme oxygenase 2;                                                            | 0.42  | 0.7778 |
| UB2L3_MOUSE  | Ubiquitin-conjugating enzyme E2 L3;                                          | -0.22 | 0.7783 |
| PLEC_MOUSE   | Perilipin-2;                                                                 | 0.68  | 0.7788 |
| IF5_MOUSE    | Eukaryotic translation initiation factor 5;                                  | 0.00  | 0.7792 |
| SGCB_MOUSE   | Beta-sarcoglycan;                                                            | 0.22  | 0.7793 |
| CSK21_MOUSE  | Casein kinase II subunit alpha;                                              | -0.46 | 0.7801 |
| PSD11_MOUSE  | 26S proteasome non-ATPase regulatory subunit 11;                             | -0.13 | 0.782  |
| Q8R5L1_MOUSE | Complement component 1, q subcomponent binding protein;                      | -0.74 | 0.782  |
| RS13_MOUSE   | 40S ribosomal protein S13;                                                   | 0.30  | 0.782  |
| RL22_MOUSE   | 60S ribosomal protein L22;                                                   | 0.32  | 0.7829 |
| TESC_MOUSE   | Tescalcin;                                                                   | 0.00  | 0.7832 |
| MLRV_MOUSE   | Myosin regulatory light chain 2, ventricular/cardiac muscle                  | -0.05 | 0.7837 |

|              |                                                                                  |       |        |
|--------------|----------------------------------------------------------------------------------|-------|--------|
|              | isoform;                                                                         |       |        |
| ARP2_MOUSE   | Actin-related protein 2;                                                         | -0.20 | 0.7848 |
| SYFB_MOUSE   | Phenylalanyl-tRNA synthetase beta chain;                                         | 1.00  | 0.7879 |
| PPIF_MOUSE   | Protein phosphatase 1B;                                                          | -0.11 | 0.7898 |
| ZPR1_MOUSE   | Zinc finger protein ZPR1;                                                        | 0.00  | 0.7905 |
| KAT3_MOUSE   | Kynurenine--oxoglutarate transaminase 3;                                         | -0.30 | 0.7922 |
| AGK_MOUSE    | Acylglycerol kinase, mitochondrial;                                              | -0.58 | 0.7925 |
| LAMA2_MOUSE  | Laminin subunit alpha-2;                                                         | -0.19 | 0.7942 |
| THIC_MOUSE   | Acetyl-CoA acetyltransferase, cytosolic;                                         | -0.32 | 0.7946 |
| NDUV2_MOUSE  | NADH dehydrogenase [ubiquinone] flavoprotein 2, mitochondrial;                   | 0.14  | 0.7948 |
| THIL_MOUSE   | Acetyl-CoA acetyltransferase, mitochondrial;                                     | -0.09 | 0.7948 |
| MPRD_MOUSE   | Cation-dependent mannose-6-phosphate receptor;                                   | -0.32 | 0.795  |
| NDUBB_MOUSE  | NADH dehydrogenase [ubiquinone] 1 beta subcomplex subunit 11, mitochondrial;     | -0.30 | 0.7962 |
| LIPL_MOUSE   | Lipoprotein lipase;                                                              | -0.20 | 0.7967 |
| SAR1B_MOUSE  | GTP-binding protein SAR1b;                                                       | 0.42  | 0.7979 |
| Q9CY10_MOUSE | Putative uncharacterized protein;                                                | -0.14 | 0.7981 |
| RBX2_MOUSE   | RING-box protein 2;                                                              | -1.58 | 0.7988 |
| 2A5A_MOUSE   | Serine/threonine-protein phosphatase 2A 56 kDa regulatory subunit alpha isoform; | -0.42 | 0.799  |
| PPGB_MOUSE   | Peptidyl-prolyl cis-trans isomerase D;                                           | -0.15 | 0.7991 |
| TPIS_MOUSE   | Triosephosphate isomerase;                                                       | -0.25 | 0.8002 |
| TMED4_MOUSE  | Transmembrane emp24 domain-containing protein 4;                                 | 0.00  | 0.802  |
| DHB8_MOUSE   | Estradiol 17-beta-dehydrogenase 8;                                               | -0.66 | 0.8025 |
| SMD2_MOUSE   | Small nuclear ribonucleoprotein Sm D2                                            | -0.32 | 0.8028 |
| MIME_MOUSE   | Mimecan;                                                                         | 0.14  | 0.804  |
| PGBM_MOUSE   | Plasma glutamate carboxypeptidase;                                               | 0.29  | 0.8053 |
| UBE2B_MOUSE  | Ubiquitin-conjugating enzyme E2 B;                                               | -0.42 | 0.8053 |
| IDH3G_MOUSE  | Isocitrate dehydrogenase [NAD] subunit gamma, mitochondrial;                     | -0.37 | 0.8063 |
| ITIH3_MOUSE  | Inter-alpha-trypsin inhibitor heavy chain H3;                                    | 0.00  | 0.8074 |
| Q7TNZ4_MOUSE | Glycosylphosphatidylinositol-specific phospholipase D;                           | -0.32 | 0.8078 |
| NFS1_MOUSE   | Cysteine desulfurase, mitochondrial;                                             | 0.00  | 0.8104 |
| GLRX5_MOUSE  | Glutaredoxin-related protein 5, mitochondrial;                                   | 0.00  | 0.8116 |
| SYEP_MOUSE   | Bifunctional aminoacyl-tRNA synthetase;                                          | 0.24  | 0.8138 |
| OXSM_MOUSE   | 3-oxoacyl-[acyl-carrier-protein] synthase, mitochondrial;                        | 0.32  | 0.8141 |
| ARP5L_MOUSE  | Actin-related protein 2/3 complex subunit 5-like protein;                        | -0.58 | 0.8152 |
| RNT2_MOUSE   | Ribonuclease T2;                                                                 | 0.15  | 0.8167 |
| COPB_MOUSE   | Coatomer subunit beta;                                                           | 0.32  | 0.8169 |
| QCR9_MOUSE   | Cytochrome b-c1 complex subunit 9;                                               | -0.22 | 0.8173 |
| 6PGL_MOUSE   | 6-phosphogluconolactonase;                                                       | -0.01 | 0.8187 |
| PDK2_MOUSE   | PDZ and LIM domain protein 1;                                                    | 0.00  | 0.8189 |
| TACO1_MOUSE  | Translational activator of cytochrome c oxidase 1;                               | -0.51 | 0.8191 |
| NUCL_MOUSE   | Nucleolin;                                                                       | -0.19 | 0.8201 |
| Q80XP1_MOUSE | Complement component 3;                                                          | -0.74 | 0.8216 |
| SEP11_MOUSE  | Septin-11;                                                                       | 0.00  | 0.8221 |
| TPP2_MOUSE   | Tripeptidyl-peptidase 2;                                                         | 0.22  | 0.8228 |
| GSHB_MOUSE   | Glutathione synthetase;                                                          | 0.00  | 0.826  |
| CAND2_MOUSE  | Cullin-associated NEDD8-dissociated protein 2;                                   | 0.07  | 0.8261 |
| A2AFQ2_MOUSE | Hydroxysteroid (17-beta) dehydrogenase 10;                                       | -0.43 | 0.8293 |
| ZA2G_MOUSE   | Zinc-alpha-2-glycoprotein;                                                       | -0.58 | 0.83   |

|              |                                                                                    |       |        |
|--------------|------------------------------------------------------------------------------------|-------|--------|
| PSMF1_MOUSE  | Proteasome inhibitor PI31 subunit;                                                 | -0.42 | 0.8302 |
| Q80UL3_MOUSE | Galactokinase 1;                                                                   | 0.00  | 0.8322 |
| RCN1_MOUSE   | Reticulocalbin-1;                                                                  | 0.11  | 0.8322 |
| PPR3A_MOUSE  | PRA1 family protein 3;                                                             | 0.00  | 0.8329 |
| B2RX08_MOUSE | MCG140951;                                                                         | 0.51  | 0.8335 |
| SCRN2_MOUSE  | Secernin-2;                                                                        | -0.05 | 0.8341 |
| CPPED_MOUSE  | Calcineurin-like phosphoesterase domain-containing protein 1;                      | -0.19 | 0.836  |
| ROCK2_MOUSE  | Rho-associated protein kinase 2;                                                   | -0.42 | 0.8367 |
| THOP1_MOUSE  | Thimet oligopeptidase;                                                             | 0.00  | 0.8367 |
| MARE2_MOUSE  | Microtubule-associated protein RP/EB family member 2;                              | 0.25  | 0.8368 |
| MP2K1_MOUSE  | Dual specificity mitogen-activated protein kinase kinase 1;                        | -0.32 | 0.8369 |
| ALDOA_MOUSE  | Fructose-bisphosphate aldolase A;                                                  | -0.11 | 0.837  |
| 68MP_MOUSE   | 6.8 kDa mitochondrial proteolipid;                                                 | 0.58  | 0.8375 |
| NDUAD_MOUSE  | NADH dehydrogenase [ubiquinone] 1 alpha subcomplex subunit 13;                     | -0.19 | 0.8378 |
| GSTO1_MOUSE  | Glutathione S-transferase omega-1;                                                 | -0.30 | 0.8406 |
| THIO_MOUSE   | Thioredoxin;                                                                       | 0.06  | 0.8411 |
| A2AUR7_MOUSE | Ras suppressor protein 1;                                                          | 0.22  | 0.8422 |
| PTPA_MOUSE   | Serine/threonine-protein phosphatase 2A activator;                                 | -0.17 | 0.8425 |
| NPTN_MOUSE   | Neuroplastin;                                                                      | 0.26  | 0.8443 |
| Q3THQ0_MOUSE | Putative uncharacterized protein;                                                  | 0.00  | 0.8444 |
| CX6B1_MOUSE  | Cytochrome c oxidase subunit 6B1;                                                  | 0.06  | 0.8446 |
| RL17_MOUSE   | 60S ribosomal protein L17;                                                         | 0.10  | 0.8449 |
| CN166_MOUSE  | UPF0568 protein C14orf166 homolog;                                                 | -0.42 | 0.8459 |
| EM55_MOUSE   | 55 kDa erythrocyte membrane protein;                                               | 0.17  | 0.8465 |
| CBR1_MOUSE   | Carbonyl reductase [NADPH] 1;                                                      | 0.03  | 0.8466 |
| HIBCH_MOUSE  | 3-hydroxyisobutyryl-CoA hydrolase, mitochondrial;                                  | -0.20 | 0.8471 |
| UB2V1_MOUSE  | Ubiquitin-conjugating enzyme E2 variant 1;                                         | 0.00  | 0.8487 |
| GALNS_MOUSE  | N-acetylgalactosamine-6-sulfatase;                                                 | 0.42  | 0.8488 |
| 2AAA_MOUSE   | Serine/threonine-protein phosphatase 2A 65 kDa regulatory subunit A alpha isoform; | -0.11 | 0.8495 |
| B1B0C7_MOUSE | Palmitoyl-protein thioesterase 1;                                                  | 0.42  | 0.8512 |
| PRAF3_MOUSE  | Peroxiredoxin-2;                                                                   | 0.58  | 0.8515 |
| PSB10_MOUSE  | Proteasome subunit beta type-10;                                                   | 0.00  | 0.8517 |
| MTX2_MOUSE   | Metaxin-2;                                                                         | -0.25 | 0.8518 |
| IPYR2_MOUSE  | Inorganic pyrophosphatase 2, mitochondrial;                                        | -0.39 | 0.8525 |
| SAP_MOUSE    | Sulfated glycoprotein 1;                                                           | -0.10 | 0.8525 |
| PRS10_MOUSE  | 26S protease regulatory subunit 4;                                                 | -0.29 | 0.8537 |
| B9EHC7_MOUSE | Calsequestrin;                                                                     | 0.22  | 0.8544 |
| DCTN2_MOUSE  | Dynactin subunit 2;                                                                | -0.23 | 0.8554 |
| NDK3_MOUSE   | Nucleoside diphosphate kinase 3;                                                   | -0.42 | 0.8555 |
| OSBP1_MOUSE  | Oxysterol-binding protein 1;                                                       | 0.00  | 0.8563 |
| VIGLN_MOUSE  | Vigilin;                                                                           | -0.14 | 0.8567 |
| NS1BP_MOUSE  | Influenza virus NS1A-binding protein homolog;                                      | 0.00  | 0.8573 |
| ACTY_MOUSE   | Beta-centractin;                                                                   | 0.32  | 0.8575 |
| UBE2K_MOUSE  | Ubiquitin-conjugating enzyme E2 K;                                                 | -0.51 | 0.8585 |
| SFPQ_MOUSE   | Splicing factor, proline- and glutamine-rich;                                      | -0.25 | 0.8596 |
| RL10_MOUSE   | 60S ribosomal protein L10;                                                         | -0.26 | 0.8599 |
| RS11_MOUSE   | 40S ribosomal protein S11;                                                         | 0.00  | 0.86   |
| A8DUV1_MOUSE | Alpha-globin;                                                                      | -0.01 | 0.8612 |

|              |                                                                  |       |        |
|--------------|------------------------------------------------------------------|-------|--------|
| ODPB_MOUSE   | Pyruvate dehydrogenase E1 component subunit beta, mitochondrial; | 0.02  | 0.8614 |
| XPP1_MOUSE   | Xaa-Pro aminopeptidase 1;                                        | 0.00  | 0.8646 |
| A3KFU5_MOUSE | Poly A binding protein, cytoplasmic 4;                           | 0.00  | 0.8651 |
| WDR61_MOUSE  | WD repeat-containing protein 61;                                 | 0.00  | 0.867  |
| TWF2_MOUSE   | Twinfilin-2;                                                     | 0.00  | 0.868  |
| DHB12_MOUSE  | Estradiol 17-beta-dehydrogenase 12;                              | 0.00  | 0.8683 |
| GNAI2_MOUSE  | Guanine nucleotide-binding protein G(i) subunit alpha-2;         | 0.00  | 0.8703 |
| Q6PKB0_MOUSE | Fcgrt protein;                                                   | 0.00  | 0.8709 |
| FRIL1_MOUSE  | Ferritin light chain 1;                                          | 0.17  | 0.8744 |
| TATD1_MOUSE  | Putative deoxyribonuclease TATDN1;                               | -0.36 | 0.8755 |
| ALDR_MOUSE   | Aldose reductase;                                                | 0.06  | 0.877  |
| Q3U561_MOUSE | Ribosomal protein;                                               | 0.00  | 0.8783 |
| MK01_MOUSE   | Mitogen-activated protein kinase 1;                              | 0.00  | 0.8789 |
| ACYP1_MOUSE  | Acylphosphatase-1;                                               | -0.26 | 0.8792 |
| MYH11_MOUSE  | Myosin-11;                                                       | 0.82  | 0.8793 |
| EF1A2_MOUSE  | Elongation factor 1-alpha 2;                                     | -0.03 | 0.8795 |
| ANXA4_MOUSE  | Annexin A4;                                                      | 0.04  | 0.8796 |
| NID1_MOUSE   | Nidogen-1;                                                       | 0.00  | 0.8809 |
| KV3A1_MOUSE  | Ig kappa chain V-III region PC 2880/PC 1229;                     | 0.00  | 0.8817 |
| SODC_MOUSE   | Superoxide dismutase [Cu-Zn];                                    | -0.03 | 0.8822 |
| Q99J77_MOUSE | N-acetylneuraminic acid synthase (Sialic acid synthase);         | -0.58 | 0.8836 |
| VAPB_MOUSE   | Vesicle-associated membrane protein-associated protein B;        | 0.00  | 0.8856 |
| EIF3F_MOUSE  | Eukaryotic translation initiation factor 3 subunit F;            | -0.17 | 0.8861 |
| IF4G1_MOUSE  | Eukaryotic translation initiation factor 4 gamma 1;              | -0.42 | 0.8867 |
| RPIA_MOUSE   | Ribose-5-phosphate isomerase;                                    | 0.00  | 0.8874 |
| SNX2_MOUSE   | Sorting nexin-2;                                                 | 0.00  | 0.8881 |
| UFM1_MOUSE   | Ubiquitin-fold modifier 1;                                       | 0.00  | 0.8881 |
| NIPS2_MOUSE  | Protein NipSnap homolog 2;                                       | -0.09 | 0.8887 |
| QOR_MOUSE    | Quinone oxidoreductase;                                          | -0.30 | 0.8891 |
| MFF_MOUSE    | Mitochondrial fission factor;                                    | 0.26  | 0.8892 |
| NDRG2_MOUSE  | Protein NDRG2;                                                   | 0.15  | 0.8915 |
| F162A_MOUSE  | Protein FAM162A;                                                 | 0.19  | 0.8935 |
| Q8BGB4_MOUSE | Putative uncharacterized protein;                                | 0.22  | 0.8973 |
| SYLC_MOUSE   | Leucyl-tRNA synthetase, cytoplasmic;                             | 0.32  | 0.8973 |
| CAZA2_MOUSE  | F-actin-capping protein subunit alpha-2;                         | 0.00  | 0.8982 |
| ACTA_MOUSE   | Actin, aortic smooth muscle;                                     | -0.08 | 0.8986 |
| Q9D5J8_MOUSE | Putative uncharacterized protein;                                | 0.00  | 0.8991 |
| ACADL_MOUSE  | Long-chain specific acyl-CoA dehydrogenase, mitochondrial;       | -0.06 | 0.9009 |
| PLSL_MOUSE   | Bisphosphoglycerate mutase;                                      | -0.36 | 0.9015 |
| PTH2_MOUSE   | Peptidyl-tRNA hydrolase 2, mitochondrial;                        | 0.42  | 0.9021 |
| PSA2_MOUSE   | Proteasome subunit alpha type-2;                                 | -0.03 | 0.9025 |
| TRI72_MOUSE  | Tripartite motif-containing protein 72;                          | 0.03  | 0.9031 |
| MSRA_MOUSE   | Peptide methionine sulfoxide reductase;                          | 0.18  | 0.9032 |
| GORS2_MOUSE  | Golgi reassembly-stacking protein 2;                             | 0.00  | 0.9041 |
| MPI_MOUSE    | Phosphate carrier protein, mitochondrial;                        | -0.07 | 0.9041 |
| PODXL_MOUSE  | Blood vessel epicardial substance;                               | -0.42 | 0.9044 |
| CYB5B_MOUSE  | Cytochrome b5 type B;                                            | 0.00  | 0.9051 |
| NFKB1_MOUSE  | Nuclear factor NF-kappa-B p105 subunit;                          | 0.00  | 0.9062 |

|              |                                                                             |       |        |
|--------------|-----------------------------------------------------------------------------|-------|--------|
| RL30_MOUSE   | 60S ribosomal protein L30;                                                  | 0.15  | 0.9067 |
| TCPB_MOUSE   | T-complex protein 1 subunit beta;                                           | -0.08 | 0.9085 |
| T22D4_MOUSE  | TSC22 domain family protein 4;                                              | -1.00 | 0.9096 |
| VTDB_MOUSE   | Vitamin D-binding protein;                                                  | -0.03 | 0.9115 |
| SYG_MOUSE    | Glycyl-tRNA synthetase;                                                     | 0.00  | 0.9117 |
| RS6_MOUSE    | 40S ribosomal protein S6;                                                   | 0.12  | 0.9126 |
| NT5C_MOUSE   | 5'(3')-deoxyribonucleotidase, cytosolic type;                               | -0.49 | 0.9131 |
| SYWC_MOUSE   | Tryptophanyl-tRNA synthetase, cytoplasmic;                                  | 0.00  | 0.9138 |
| NPL4_MOUSE   | Nuclear protein localization protein 4 homolog;                             | 0.00  | 0.9139 |
| IGH1M_MOUSE  | Ig gamma-1 chain C region, membrane-bound form;                             | -0.09 | 0.9159 |
| OPLA_MOUSE   | 5-oxoprolinase;                                                             | -0.23 | 0.9163 |
| Q6YK32_MOUSE | Histidine-rich glycoprotein HRG;                                            | 0.00  | 0.9168 |
| NPM_MOUSE    | Nucleophosmin;                                                              | 0.42  | 0.9176 |
| RIFK_MOUSE   | Riboflavin kinase;                                                          | 0.00  | 0.9176 |
| SAM50_MOUSE  | Sorting and assembly machinery component 50 homolog;                        | -0.05 | 0.9178 |
| GSTA1_MOUSE  | Glutathione S-transferase A1;                                               | 0.00  | 0.9179 |
| VPS28_MOUSE  | Vacuolar protein sorting-associated protein 28 homolog;                     | 0.00  | 0.9183 |
| Q3TVK3_MOUSE | Putative uncharacterized protein;                                           | 0.09  | 0.9211 |
| INMT_MOUSE   | Indolethylamine N-methyltransferase;                                        | 0.58  | 0.9215 |
| RBBP9_MOUSE  | Putative hydrolase RBBP9;                                                   | 0.00  | 0.9215 |
| 1433B_MOUSE  | 14-3-3 protein beta/alpha;                                                  | 0.06  | 0.9224 |
| CHIP_MOUSE   | STIP1 homology and U box-containing protein 1;                              | 0.00  | 0.9256 |
| SMPX_MOUSE   | Small muscular protein;                                                     | -0.65 | 0.9266 |
| TCPD_MOUSE   | T-complex protein 1 subunit delta;                                          | -0.19 | 0.9269 |
| HEXA_MOUSE   | Beta-hexosaminidase subunit alpha;                                          | 0.00  | 0.9284 |
| PNPH_MOUSE   | Podocalyxin;                                                                | 0.00  | 0.9288 |
| UBP2L_MOUSE  | Ubiquitin-associated protein 2-like;                                        | -0.49 | 0.9298 |
| CARKD_MOUSE  | Carbohydrate kinase domain-containing protein;                              | 0.22  | 0.9301 |
| HNRPM_MOUSE  | Heterogeneous nuclear ribonucleoprotein M;                                  | -0.22 | 0.9303 |
| EIF3C_MOUSE  | Eukaryotic translation initiation factor 3 subunit C;                       | 0.58  | 0.9313 |
| RPN1_MOUSE   | Dolichyl-diphosphooligosaccharide--protein glycosyltransferase subunit 1;   | 0.11  | 0.9323 |
| NDUB5_MOUSE  | NADH dehydrogenase [ubiquinone] 1 beta subcomplex subunit 5, mitochondrial; | 0.10  | 0.9332 |
| PGES2_MOUSE  | Phosphoglycerate kinase 1;                                                  | 0.18  | 0.9351 |
| CA069_MOUSE  | Putative transferase C1orf69 homolog, mitochondrial;                        | -0.36 | 0.9354 |
| DHPR_MOUSE   | Dihydropteridine reductase;                                                 | -0.08 | 0.9355 |
| AMD_MOUSE    | Peptidyl-glycine alpha-amidating monooxygenase;                             | 0.32  | 0.9357 |
| Q91XL1_MOUSE | Leucine-rich HEV glycoprotein;                                              | 0.42  | 0.9357 |
| LYAG_MOUSE   | Lysosomal alpha-glucosidase;                                                | 0.26  | 0.937  |
| DDX3X_MOUSE  | ATP-dependent RNA helicase DDX3X;                                           | -0.58 | 0.9371 |
| TWF1_MOUSE   | Twinfilin-1;                                                                | 0.00  | 0.9372 |
| PGRC1_MOUSE  | Membrane-associated progesterone receptor component 2;                      | 0.42  | 0.938  |
| OCSR1_MOUSE  | Serine/threonine-protein kinase OSR1;                                       | -0.42 | 0.9392 |
| HSPB7_MOUSE  | Heat shock protein beta-6;                                                  | -0.05 | 0.9411 |
| UBA1_MOUSE   | Ubiquitin-like modifier-activating enzyme 1;                                | -0.14 | 0.9414 |
| COL12_MOUSE  | Collectin-12;                                                               | 0.58  | 0.9422 |
| IF4A1_MOUSE  | Eukaryotic initiation factor 4A-1;                                          | -0.18 | 0.9457 |
| ACTN1_MOUSE  | Alpha-actinin-1;                                                            | 0.07  | 0.9468 |
| SAE1_MOUSE   | SUMO-activating enzyme subunit 1;                                           | 0.00  | 0.9478 |

|              |                                                                    |       |        |
|--------------|--------------------------------------------------------------------|-------|--------|
| DCTN4_MOUSE  | Dynactin subunit 4;                                                | 0.36  | 0.9482 |
| MP2K2_MOUSE  | Dual specificity mitogen-activated protein kinase kinase 2;        | 0.00  | 0.9487 |
| A2AKI2_MOUSE | START domain containing 9;                                         | 0.00  | 0.9492 |
| NDUB9_MOUSE  | NADH dehydrogenase [ubiquinone] 1 beta subcomplex subunit 9;       | -0.27 | 0.9496 |
| RAP1A_MOUSE  | Ras-related protein Rap-1A;                                        | -0.13 | 0.95   |
| CTNA2_MOUSE  | Catenin alpha-2;                                                   | 0.00  | 0.952  |
| G6PD1_MOUSE  | Glucose-6-phosphate 1-dehydrogenase X;                             | -0.74 | 0.9525 |
| NDUS5_MOUSE  | NADH dehydrogenase [ubiquinone] iron-sulfur protein 5;             | 0.09  | 0.9538 |
| KGUA_MOUSE   | Guanylate kinase;                                                  | 0.22  | 0.9546 |
| GSTM1_MOUSE  | Glutathione S-transferase Mu 1;                                    | -0.03 | 0.9558 |
| AMPN_MOUSE   | Aminopeptidase N;                                                  | 0.32  | 0.9559 |
| TIPRL_MOUSE  | TIP41-like protein;                                                | -0.42 | 0.9561 |
| RB11B_MOUSE  | Ras-related protein Rab-11B;                                       | -0.07 | 0.9579 |
| LZIC_MOUSE   | Protein LZIC;                                                      | -0.22 | 0.9584 |
| B1AWE0_MOUSE | Aldehyde dehydrogenase 4 family, member A1;                        | 0.22  | 0.9594 |
| AP2A1_MOUSE  | AP-2 complex subunit alpha-1;                                      | 0.00  | 0.9611 |
| TACC2_MOUSE  | Transforming acidic coiled-coil-containing protein 2;              | 0.00  | 0.9625 |
| NSF_MOUSE    | Vesicle-fusing ATPase;                                             | 0.00  | 0.9628 |
| ABHEB_MOUSE  | Abhydrolase domain-containing protein 14B;                         | -0.26 | 0.9639 |
| BASI_MOUSE   | Basigin;                                                           | 0.21  | 0.9656 |
| NSF1C_MOUSE  | NSFL1 cofactor p47;                                                | 0.00  | 0.9665 |
| PEA15_MOUSE  | Phosphatidylethanolamine-binding protein 1;                        | -0.21 | 0.9679 |
| HUWE1_MOUSE  | Serine protease HTRA2, mitochondrial;                              | -0.14 | 0.969  |
| GCAA_MOUSE   | Ig gamma-2A chain C region, A allele;                              | 0.16  | 0.9691 |
| NDUA5_MOUSE  | NADH dehydrogenase [ubiquinone] 1 alpha subcomplex subunit 5;      | -0.11 | 0.97   |
| ITIH2_MOUSE  | Inter-alpha-trypsin inhibitor heavy chain H2;                      | 0.00  | 0.9704 |
| MARK3_MOUSE  | MAP/microtubule affinity-regulating kinase 3;                      | -0.58 | 0.9714 |
| KATL2_MOUSE  | Katanin p60 ATPase-containing subunit A-like 2;                    | -0.42 | 0.9735 |
| PACN2_MOUSE  | Protein kinase C and casein kinase substrate in neurons protein 2; | 0.30  | 0.9737 |
| ATAD1_MOUSE  | ATPase family AAA domain-containing protein 1;                     | 0.26  | 0.974  |
| TPM3_MOUSE   | Tropomyosin alpha-3 chain;                                         | -0.42 | 0.9745 |
| NIT2_MOUSE   | Omega-amidase NIT2;                                                | -0.36 | 0.9765 |
| ACS2L_MOUSE  | Acetyl-coenzyme A synthetase 2-like, mitochondrial;                | -0.28 | 0.9766 |
| LGMN_MOUSE   | Legumain;                                                          | 0.42  | 0.9769 |
| MCCA_MOUSE   | Methylcrotonoyl-CoA carboxylase subunit alpha, mitochondrial;      | -0.11 | 0.9769 |
| TIM13_MOUSE  | Mitochondrial import inner membrane translocase subunit Tim13;     | 0.00  | 0.9769 |
| ANK2_MOUSE   | Ankyrin-2;                                                         | 0.13  | 0.9773 |
| GBLP_MOUSE   | Guanine nucleotide-binding protein subunit beta-2-like 1;          | 0.06  | 0.9775 |
| ADHX_MOUSE   | Alcohol dehydrogenase class-3;                                     | 0.20  | 0.9787 |
| COR1A_MOUSE  | Coronin-1A;                                                        | 0.00  | 0.9794 |
| COFA1_MOUSE  | Collagen alpha-1(XV) chain;                                        | 0.29  | 0.9801 |
| GMPPB_MOUSE  | Mannose-1-phosphate guanyltransferase beta;                        | 0.00  | 0.9802 |
| DPYL1_MOUSE  | Dihydropyrimidinase-related protein 1;                             | 0.58  | 0.9807 |
| Q8BG11_MOUSE | Cadherin 13, isoform CRA_a;                                        | -0.42 | 0.9807 |
| EF1G_MOUSE   | Elongation factor 1-gamma;                                         | 0.36  | 0.9829 |
| CD36_MOUSE   | Platelet glycoprotein 4;                                           | 0.14  | 0.9831 |
| TM1L2_MOUSE  | TOM1-like protein 2;                                               | 0.00  | 0.9832 |
| NAC1_MOUSE   | Sodium/calcium exchanger 1;                                        | 0.26  | 0.9838 |



|              |                                                                    |       |        |
|--------------|--------------------------------------------------------------------|-------|--------|
| MTAP_MOUSE   | S-methyl-5'-thioadenosine phosphorylase;                           | -0.10 | 0.9856 |
| NB5R3_MOUSE  | NADH-cytochrome b5 reductase 3;                                    | 0.42  | 0.9861 |
| Q3U8M3_MOUSE | Putative uncharacterized protein;                                  | 0.00  | 0.9868 |
| PPM1B_MOUSE  | Protein phosphatase methylesterase 1;                              | 0.00  | 0.9886 |
| TRI54_MOUSE  | Tripartite motif-containing protein 54;                            | 0.26  | 0.9904 |
| HGS_MOUSE    | Hepatocyte growth factor-regulated tyrosine kinase substrate;      | -0.58 | 0.9911 |
| LAP2A_MOUSE  | Lamina-associated polypeptide 2, isoforms alpha/zeta;              | 0.85  | 0.9915 |
| PGAM1_MOUSE  | Phosphoglycerate mutase 2;                                         | -0.02 | 0.992  |
| NUDC_MOUSE   | Nuclear migration protein nudC;                                    | 0.00  | 0.9945 |
| QCR7_MOUSE   | Cytochrome b-c1 complex subunit 7;                                 | 0.07  | 0.9949 |
| Q3TQ15_MOUSE | Aconitase 1;                                                       | -0.15 | 0.9952 |
| TOM22_MOUSE  | Mitochondrial import receptor subunit TOM22 homolog;               | 0.17  | 0.9968 |
| PSMD6_MOUSE  | 26S proteasome non-ATPase regulatory subunit 6;                    | 0.00  | 0.997  |
| PSMD1_MOUSE  | 26S proteasome non-ATPase regulatory subunit 1;                    | 0.00  | 0.9976 |
| PLAK_MOUSE   | 1-phosphatidylinositol-4,5-bisphosphate phosphodiesterase delta-1; | 0.58  | 0.9993 |
| VATH_MOUSE   | V-type proton ATPase subunit H;                                    | 0.42  | 0.9993 |
| K0564_MOUSE  | Uncharacterized protein KIAA0564 homolog;                          | 0.00  | 0.9998 |
| EMAL1_MOUSE  | Echinoderm microtubule-associated protein-like 1;                  | 0.00  | 1      |
| PASK_MOUSE   | PAS domain-containing serine/threonine-protein kinase;             | 0.00  | 1      |
