# Supplementary material
Source: PubMed Central journal article supplement (PMC2972971)
Supplement: 1013555107_st03.pdf [file 1013555107_st03.pdf]

**Supplemental table S3.** GO terms significantly enriched in significantly downregulated proteins of the proteome. K: number of genes from the input cluster in the given category. F: number of total genes in the given category.

| Biological Process GO Terms: Over Representation                 | Sorting Results by: the p-Value in an ascending order. |          |    |       |
|------------------------------------------------------------------|--------------------------------------------------------|----------|----|-------|
| Category                                                         | GO Level                                               | p-value  | K  | F     |
| [GO:0019752] carboxylic acid metabolism                          | 7                                                      | 4.44E-16 | 24 | 521   |
| [GO:0006091] generation of precursor metabolites and energy      | 6                                                      | 6.66E-16 | 27 | 698   |
| [GO:0006732] coenzyme metabolism                                 | 7                                                      | 1.55E-15 | 18 | 179   |
| [GO:0006082] organic acid metabolism                             | 6                                                      | 2.78E-15 | 24 | 522   |
| [GO:0015980] energy derivation by oxidation of organic compounds | 7                                                      | 4.44E-15 | 15 | 175   |
| [GO:0051186] cofactor metabolism                                 | 6                                                      | 6.44E-15 | 18 | 208   |
| [GO:0006092] main pathways of carbohydrate metabolism            | 12                                                     | 2.22E-13 | 12 | 123   |
| [GO:0009060] aerobic respiration                                 | 9                                                      | 6.97E-13 | 8  | 31    |
| [GO:0006084] acetyl-CoA metabolism                               | 8                                                      | 3.35E-12 | 8  | 37    |
| [GO:0045333] cellular respiration                                | 8                                                      | 3.35E-12 | 8  | 37    |
| [GO:0006631] fatty acid metabolism                               | 11                                                     | 1.04E-11 | 12 | 170   |
| [GO:0006099] tricarboxylic acid cycle                            | 23                                                     | 1.08E-11 | 7  | 25    |
| [GO:0046356] acetyl-CoA catabolism                               | 13                                                     | 1.47E-11 | 7  | 26    |
| [GO:0050875] cellular physiological process                      | 3                                                      | 2.15E-11 | 76 | 10888 |
| [GO:0009109] coenzyme catabolism                                 | 11                                                     | 5.78E-11 | 7  | 31    |
| [GO:0007582] physiological process                               | 1                                                      | 1.33E-10 | 82 | 13342 |
| [GO:0008152] metabolism                                          | 2                                                      | 1.44E-10 | 65 | 8216  |
| [GO:0051187] cofactor catabolism                                 | 9                                                      | 1.46E-10 | 7  | 35    |
| [GO:0006100] tricarboxylic acid cycle intermediate metabolism    | 13                                                     | 1.53E-10 | 6  | 19    |
| [GO:0044248] cellular catabolism                                 | 7                                                      | 1.63E-10 | 17 | 542   |
| [GO:0044262] cellular carbohydrate metabolism                    | 6                                                      | 4.57E-10 | 14 | 357   |
| [GO:0044237] cellular metabolism                                 | 5                                                      | 1.82E-09 | 61 | 7694  |
| [GO:0009056] catabolism                                          | 3                                                      | 1.87E-09 | 17 | 636   |
| [GO:0043648] dicarboxylic acid metabolism                        | 8                                                      | 5.10E-09 | 4  | 6     |
| [GO:0006637] acyl-CoA metabolism                                 | 14                                                     | 6.00E-09 | 5  | 16    |
| [GO:0005975] carbohydrate metabolism                             | 5                                                      | 1.96E-08 | 14 | 479   |

|                                                   |    |          |    |       |
|---------------------------------------------------|----|----------|----|-------|
| [GO:0006108] malate metabolism                    | 17 | 8.05E-07 | 3  | 5     |
| [GO:0044255] cellular lipid metabolism            | 8  | 5.11E-06 | 12 | 554   |
| [GO:0051188] cofactor biosynthesis                | 9  | 9.23E-06 | 6  | 111   |
| [GO:0006733] oxidoreduction coenzyme metabolism   | 8  | 1.12E-05 | 4  | 32    |
| [GO:0006519] amino acid and derivative metabolism | 7  | 1.55E-05 | 9  | 334   |
| [GO:0008150] biological_process                   | 0  | 1.65E-05 | 83 | 16056 |
| [GO:0006603] phosphocreatine metabolism           | 10 | 1.89E-05 | 2  | 2     |
| [GO:0019439] aromatic compound catabolism         | 9  | 2.85E-05 | 3  | 14    |
| [GO:0006629] lipid metabolism                     | 4  | 3.02E-05 | 12 | 662   |
| [GO:0006118] electron transport                   | 7  | 3.11E-05 | 10 | 458   |
| [GO:0009987] cellular process                     | 1  | 5.70E-05 | 76 | 13877 |
| [GO:0009108] coenzyme biosynthesis                | 11 | 6.38E-05 | 5  | 96    |
| [GO:0044238] primary metabolism                   | 3  | 9.55E-05 | 50 | 7431  |
| [GO:0006599] phosphagen metabolism                | 9  | 0.000113 | 2  | 4     |
| [GO:0009063] amino acid catabolism                | 17 | 0.000121 | 4  | 58    |
| [GO:0006810] transport                            | 6  | 0.000182 | 24 | 2558  |
| [GO:0006572] tyrosine catabolism                  | 23 | 0.000188 | 2  | 5     |
| [GO:0006006] glucose metabolism                   | 13 | 0.000222 | 5  | 125   |
| [GO:0051234] establishment of localization        | 3  | 0.000229 | 26 | 2935  |
| [GO:0009310] amine catabolism                     | 11 | 0.000238 | 4  | 69    |
| [GO:0044270] nitrogen compound catabolism         | 9  | 0.000252 | 4  | 70    |
| [GO:0051179] localization                         | 2  | 0.000285 | 26 | 2975  |
| [GO:0006066] alcohol metabolism                   | 6  | 0.000346 | 7  | 300   |
| [GO:0006559] L-phenylalanine catabolism           | 23 | 0.000392 | 2  | 7     |
| [GO:0019395] fatty acid oxidation                 | 12 | 0.000402 | 3  | 33    |
| [GO:0006575] amino acid derivative metabolism     | 8  | 0.00044  | 4  | 81    |
| [GO:0006743] ubiquinone metabolism                | 10 | 0.000521 | 2  | 8     |
| [GO:0006558] L-phenylalanine metabolism           | 15 | 0.000521 | 2  | 8     |
| [GO:0006744] ubiquinone biosynthesis              | 16 | 0.000521 | 2  | 8     |
| [GO:0045426] quinone cofactor biosynthesis        | 13 | 0.000668 | 2  | 9     |
| [GO:0046395] carboxylic acid catabolism           | 11 | 0.000833 | 2  | 10    |
| [GO:0016054] organic acid catabolism              | 9  | 0.000833 | 2  | 10    |

|                                                                |    |          |    |      |
|----------------------------------------------------------------|----|----------|----|------|
| [GO:0009074] aromatic amino acid family catabolism             | 21 | 0.000833 | 2  | 10   |
| [GO:0042375] quinone cofactor metabolism                       | 7  | 0.000833 | 2  | 10   |
| [GO:0019318] hexose metabolism                                 | 12 | 0.000881 | 5  | 169  |
| [GO:0005996] monosaccharide metabolism                         | 11 | 0.001004 | 5  | 174  |
| [GO:0009065] glutamine family amino acid catabolism            | 19 | 0.001215 | 2  | 12   |
| [GO:0019363] pyridine nucleotide biosynthesis                  | 22 | 0.001215 | 2  | 12   |
| [GO:0044275] cellular carbohydrate catabolism                  | 15 | 0.001388 | 4  | 110  |
| [GO:0016052] carbohydrate catabolism                           | 8  | 0.001388 | 4  | 110  |
| [GO:0006570] tyrosine metabolism                               | 15 | 0.001432 | 2  | 13   |
| [GO:0000051] urea cycle intermediate metabolism                | 4  | 0.001432 | 2  | 13   |
| [GO:0006725] aromatic compound metabolism                      | 6  | 0.001797 | 4  | 118  |
| [GO:0009058] biosynthesis                                      | 3  | 0.002046 | 15 | 1501 |
| [GO:0042364] water-soluble vitamin biosynthesis                | 11 | 0.002769 | 2  | 18   |
| [GO:0006807] nitrogen compound metabolism                      | 3  | 0.003046 | 7  | 437  |
| [GO:0006096] glycolysis                                        | 27 | 0.003588 | 3  | 70   |
| [GO:0009110] vitamin biosynthesis                              | 9  | 0.003768 | 2  | 21   |
| [GO:0006635] fatty acid beta-oxidation                         | 13 | 0.003768 | 2  | 21   |
| [GO:0006769] nicotinamide metabolism                           | 15 | 0.003768 | 2  | 21   |
| [GO:0046502] uroporphyrinogen III metabolism                   | 9  | 0.004378 | 1  | 1    |
| [GO:0006780] uroporphyrinogen III biosynthesis                 | 14 | 0.004378 | 1  | 1    |
| [GO:0046314] phosphocreatine biosynthesis                      | 15 | 0.004378 | 1  | 1    |
| [GO:0006781] succinyl-CoA pathway                              | 15 | 0.004378 | 1  | 1    |
| [GO:0001315] age-dependent response to reactive oxygen species | 12 | 0.004378 | 1  | 1    |
| [GO:0006106] fumarate metabolism                               | 17 | 0.004378 | 1  | 1    |
| [GO:0006741] NADP biosynthesis                                 | 25 | 0.004378 | 1  | 1    |
| [GO:0019362] pyridine nucleotide metabolism                    | 14 | 0.004911 | 2  | 24   |
| [GO:0006007] glucose catabolism                                | 23 | 0.005039 | 3  | 79   |
| [GO:0006090] pyruvate metabolism                               | 8  | 0.005322 | 2  | 25   |
| [GO:0044249] cellular biosynthesis                             | 7  | 0.005581 | 13 | 1347 |
| [GO:0009072] aromatic amino acid family metabolism             | 14 | 0.00575  | 2  | 26   |
| [GO:0019320] hexose catabolism                                 | 21 | 0.005978 | 3  | 84   |
| [GO:0046365] monosaccharide catabolism                         | 19 | 0.005978 | 3  | 84   |

|                                                            |    |          |   |     |
|------------------------------------------------------------|----|----------|---|-----|
| [GO:0046164] alcohol catabolism                            | 9  | 0.006381 | 3 | 86  |
| [GO:0006520] amino acid metabolism                         | 12 | 0.007073 | 5 | 274 |
| [GO:0006879] iron ion homeostasis                          | 12 | 0.007609 | 2 | 30  |
| [GO:0006826] iron ion transport                            | 12 | 0.008111 | 2 | 31  |
| [GO:0006919] caspase activation                            | 22 | 0.008111 | 2 | 31  |
| [GO:0006591] ornithine metabolism                          | 15 | 0.008737 | 1 | 2   |
| [GO:0009448] gamma-aminobutyric acid metabolism            | 14 | 0.008737 | 1 | 2   |
| [GO:0046359] butyrate catabolism                           | 13 | 0.008737 | 1 | 2   |
| [GO:0006101] citrate metabolism                            | 16 | 0.008737 | 1 | 2   |
| [GO:0009082] branched chain family amino acid biosynthesis | 19 | 0.008737 | 1 | 2   |
| [GO:0019794] nonprotein amino acid metabolism              | 13 | 0.008737 | 1 | 2   |
| [GO:0000303] response to superoxide                        | 13 | 0.008737 | 1 | 2   |
| [GO:0009450] gamma-aminobutyric acid catabolism            | 23 | 0.008737 | 1 | 2   |
| [GO:0015810] aspartate transport                           | 12 | 0.008737 | 1 | 2   |
| [GO:0016197] endosome transport                            | 12 | 0.009158 | 2 | 33  |
| [GO:0009308] amine metabolism                              | 7  | 0.009527 | 6 | 413 |
| [GO:0043280] positive regulation of caspase activity       | 20 | 0.009703 | 2 | 34  |
