# Supplementary material
Source: PubMed Central journal article supplement (PMC2972971)
Supplement: 1013555107_st04.pdf [file 1013555107_st04.pdf]

**Supplemental table S4.** GO terms significantly enriched in significantly upregulated proteins of the proteome. K: number of genes from the input cluster in the given category. F: number of total genes in the given category.

| Biological Process GO Terms: Over Representation                     |          | Sorting Results by: the p-Value in an ascending order. |     |       |
|----------------------------------------------------------------------|----------|--------------------------------------------------------|-----|-------|
| Category                                                             | GO Level | p-value                                                | k   | f     |
| [GO:0007010] cytoskeleton organization and biogenesis                | 6        | 4.88E-15                                               | 27  | 528   |
| [GO:0006996] organelle organization and biogenesis                   | 5        | 7.33E-14                                               | 35  | 1236  |
| [GO:0050875] cellular physiological process                          | 3        | 2.42E-13                                               | 111 | 10888 |
| [GO:0030029] actin filament-based process                            | 7        | 5.64E-13                                               | 16  | 210   |
| [GO:0030036] actin cytoskeleton organization and biogenesis          | 8        | 1.72E-12                                               | 15  | 189   |
| [GO:0016043] cell organization and biogenesis                        | 4        | 1.07E-11                                               | 43  | 2181  |
| [GO:0008150] biological_process                                      | 0        | 3.07E-11                                               | 127 | 16056 |
| [GO:0007582] physiological process                                   | 1        | 3.23E-11                                               | 118 | 13342 |
| [GO:0009987] cellular process                                        | 1        | 7.41E-09                                               | 117 | 13877 |
| [GO:0019538] protein metabolism                                      | 5        | 2.34E-08                                               | 50  | 3565  |
| [GO:0006457] protein folding                                         | 11       | 6.21E-08                                               | 12  | 241   |
| [GO:0051261] protein depolymerization                                | 11       | 1.37E-07                                               | 6   | 37    |
| [GO:0007517] muscle development                                      | 4        | 1.41E-07                                               | 10  | 166   |
| [GO:0051128] regulation of cell organization and biogenesis          | 9        | 4.08E-07                                               | 7   | 71    |
| [GO:0051649] establishment of cellular localization                  | 8        | 6.74E-07                                               | 19  | 774   |
| [GO:0051641] cellular localization                                   | 6        | 8.98E-07                                               | 19  | 789   |
| [GO:0043118] negative regulation of physiological process            | 5        | 9.41E-07                                               | 20  | 871   |
| [GO:0007017] microtubule-based process                               | 7        | 9.89E-07                                               | 10  | 205   |
| [GO:0051248] negative regulation of protein metabolism               | 13       | 1.10E-06                                               | 7   | 82    |
| [GO:0044260] cellular macromolecule metabolism                       | 7        | 1.26E-06                                               | 44  | 3316  |
| [GO:0046907] intracellular transport                                 | 10       | 2.27E-06                                               | 18  | 760   |
| [GO:0044267] cellular protein metabolism                             | 10       | 2.30E-06                                               | 43  | 3272  |
| [GO:0051179] localization                                            | 2        | 3.48E-06                                               | 40  | 2975  |
| [GO:0006950] response to stress                                      | 2        | 3.65E-06                                               | 19  | 868   |
| [GO:0051129] negative regulation of cell organization and biogenesis | 14       | 4.67E-06                                               | 5   | 38    |
| [GO:0006809] nitric oxide biosynthesis                               | 6        | 4.98E-06                                               | 4   | 18    |

|                                                                         |    |          |    |      |
|-------------------------------------------------------------------------|----|----------|----|------|
| [GO:0046209] nitric oxide metabolism                                    | 4  | 4.98E-06 | 4  | 18   |
| [GO:0006986] response to unfolded protein                               | 6  | 5.01E-06 | 6  | 67   |
| [GO:0051789] response to protein stimulus                               | 3  | 5.01E-06 | 6  | 67   |
| [GO:0051234] establishment of localization                              | 3  | 6.49E-06 | 39 | 2935 |
| [GO:0008152] metabolism                                                 | 2  | 1.06E-05 | 78 | 8216 |
| [GO:0008064] regulation of actin polymerization and/or depolymerization | 24 | 1.10E-05 | 5  | 45   |
| [GO:0030832] regulation of actin filament length                        | 9  | 1.22E-05 | 5  | 46   |
| [GO:0048519] negative regulation of biological process                  | 2  | 1.41E-05 | 20 | 1043 |
| [GO:0048513] organ development                                          | 3  | 1.55E-05 | 22 | 1234 |
| [GO:0044238] primary metabolism                                         | 3  | 1.86E-05 | 72 | 7431 |
| [GO:0007015] actin filament organization                                | 9  | 2.25E-05 | 5  | 52   |
| [GO:0030834] regulation of actin filament depolymerization              | 28 | 2.33E-05 | 4  | 26   |
| [GO:0030042] actin filament depolymerization                            | 18 | 2.33E-05 | 4  | 26   |
| [GO:0006936] muscle contraction                                         | 3  | 2.73E-05 | 7  | 133  |
| [GO:0030705] cytoskeleton-dependent intracellular transport             | 11 | 3.15E-05 | 7  | 136  |
| [GO:0051243] negative regulation of cellular physiological process      | 11 | 3.15E-05 | 17 | 835  |
| [GO:0051258] protein polymerization                                     | 11 | 3.24E-05 | 5  | 56   |
| [GO:0044237] cellular metabolism                                        | 5  | 3.41E-05 | 73 | 7694 |
| [GO:0008154] actin polymerization and/or depolymerization               | 13 | 3.84E-05 | 5  | 58   |
| [GO:0009892] negative regulation of metabolism                          | 8  | 4.29E-05 | 11 | 382  |
| [GO:0000910] cytokinesis                                                | 5  | 5.45E-05 | 4  | 32   |
| [GO:0043170] macromolecule metabolism                                   | 3  | 5.62E-05 | 64 | 6493 |
| [GO:0048856] anatomical structure development                           | 2  | 7.70E-05 | 28 | 1998 |
| [GO:0006915] apoptosis                                                  | 7  | 0.000126 | 14 | 670  |
| [GO:0019471] 4-hydroxyproline metabolism                                | 12 | 0.000127 | 2  | 3    |
| [GO:0019511] peptidyl-proline hydroxylation                             | 16 | 0.000127 | 2  | 3    |
| [GO:0018401] peptidyl-proline hydroxylation to 4-hydroxy-L-proline      | 23 | 0.000127 | 2  | 3    |
| [GO:0007018] microtubule-based movement                                 | 15 | 0.000138 | 6  | 120  |
| [GO:0051246] regulation of protein metabolism                           | 9  | 0.000145 | 9  | 296  |
| [GO:0012501] programmed cell death                                      | 6  | 0.000149 | 14 | 681  |
| [GO:0048523] negative regulation of cellular process                    | 5  | 0.000163 | 17 | 955  |
| [GO:0008219] cell death                                                 | 5  | 0.000226 | 14 | 709  |

|                                                                      |    |          |    |      |
|----------------------------------------------------------------------|----|----------|----|------|
| [GO:0016265] death                                                   | 2  | 0.00023  | 14 | 710  |
| [GO:0018208] peptidyl-proline modification                           | 15 | 0.000253 | 2  | 4    |
| [GO:0006930] substrate-bound cell migration, cell extension          | 11 | 0.000253 | 2  | 4    |
| [GO:0001778] plasma membrane repair                                  | 14 | 0.000253 | 2  | 4    |
| [GO:0042981] regulation of apoptosis                                 | 13 | 0.000266 | 11 | 470  |
| [GO:0008360] regulation of cell shape                                | 9  | 0.000272 | 4  | 48   |
| [GO:0043067] regulation of programmed cell death                     | 11 | 0.000296 | 11 | 476  |
| [GO:0009266] response to temperature stimulus                        | 3  | 0.000371 | 4  | 52   |
| [GO:0051016] barbed-end actin filament capping                       | 38 | 0.000384 | 3  | 22   |
| [GO:0006810] transport                                               | 6  | 0.00042  | 31 | 2558 |
| [GO:0051693] actin filament capping                                  | 37 | 0.00044  | 3  | 23   |
| [GO:0042060] wound healing                                           | 8  | 0.000441 | 5  | 97   |
| [GO:0007519] striated muscle development                             | 5  | 0.000462 | 5  | 98   |
| [GO:0030835] negative regulation of actin filament depolymerization  | 36 | 0.0005   | 3  | 24   |
| [GO:0045428] regulation of nitric oxide biosynthesis                 | 11 | 0.000872 | 2  | 7    |
| [GO:0051674] localization of cell                                    | 3  | 0.000927 | 9  | 382  |
| [GO:0006928] cell motility                                           | 8  | 0.000927 | 9  | 382  |
| [GO:0040011] locomotion                                              | 2  | 0.001072 | 9  | 390  |
| [GO:0009408] response to heat                                        | 5  | 0.001292 | 3  | 33   |
| [GO:0043066] negative regulation of apoptosis                        | 19 | 0.001376 | 6  | 185  |
| [GO:0051130] positive regulation of cell organization and biogenesis | 14 | 0.001483 | 2  | 9    |
| [GO:0050819] negative regulation of coagulation                      | 8  | 0.001483 | 2  | 9    |
| [GO:0043069] negative regulation of programmed cell death            | 16 | 0.001493 | 6  | 188  |
| [GO:0009653] morphogenesis                                           | 3  | 0.001557 | 17 | 1166 |
| [GO:0007275] development                                             | 1  | 0.001563 | 29 | 2523 |
| [GO:0045445] myoblast differentiation                                | 12 | 0.001805 | 3  | 37   |
| [GO:0001525] angiogenesis                                            | 9  | 0.001824 | 5  | 133  |
| [GO:0031114] regulation of microtubule depolymerization              | 25 | 0.001846 | 2  | 10   |
| [GO:0050818] regulation of coagulation                               | 5  | 0.001846 | 2  | 10   |
| [GO:0007026] negative regulation of microtubule depolymerization     | 36 | 0.001846 | 2  | 10   |
| [GO:0006916] anti-apoptosis                                          | 20 | 0.001885 | 5  | 134  |
| [GO:0006575] amino acid derivative metabolism                        | 8  | 0.001969 | 4  | 81   |

|                                                                                    |    |          |    |      |
|------------------------------------------------------------------------------------|----|----------|----|------|
| [GO:0006605] protein targeting                                                     | 15 | 0.002058 | 7  | 271  |
| [GO:0007019] microtubule depolymerization                                          | 18 | 0.002246 | 2  | 11   |
| [GO:0006929] substrate-bound cell migration                                        | 10 | 0.002246 | 2  | 11   |
| [GO:0030866] cortical actin cytoskeleton organization and biogenesis               | 10 | 0.002246 | 2  | 11   |
| [GO:0050791] regulation of physiological process                                   | 3  | 0.002274 | 38 | 3719 |
| [GO:0006807] nitrogen compound metabolism                                          | 3  | 0.002334 | 9  | 437  |
| [GO:0009887] organ morphogenesis                                                   | 5  | 0.00259  | 11 | 622  |
| [GO:0031111] negative regulation of microtubule polymerization or depolymerization | 21 | 0.002684 | 2  | 12   |
| [GO:0055002] striated muscle cell development                                      | 12 | 0.002684 | 2  | 12   |
| [GO:0030239] myofibril assembly                                                    | 27 | 0.002684 | 2  | 12   |
| [GO:0007009] plasma membrane organization and biogenesis                           | 6  | 0.002684 | 2  | 12   |
| [GO:0055001] muscle cell development                                               | 6  | 0.002684 | 2  | 12   |
| [GO:0051301] cell division                                                         | 4  | 0.002861 | 6  | 214  |
| [GO:0030199] collagen fibril organization                                          | 6  | 0.003158 | 2  | 13   |
| [GO:0031109] microtubule polymerization or depolymerization                        | 9  | 0.003158 | 2  | 13   |
| [GO:0031110] regulation of microtubule polymerization or depolymerization          | 15 | 0.003158 | 2  | 13   |
| [GO:0001654] eye development                                                       | 5  | 0.003382 | 4  | 94   |
| [GO:0030865] cortical cytoskeleton organization and biogenesis                     | 7  | 0.003669 | 2  | 14   |
| [GO:0050789] regulation of biological process                                      | 1  | 0.003788 | 41 | 4223 |
| [GO:0000902] cell morphogenesis                                                    | 8  | 0.003939 | 9  | 473  |
| [GO:0048514] blood vessel morphogenesis                                            | 8  | 0.003944 | 5  | 159  |
| [GO:0042692] muscle cell differentiation                                           | 4  | 0.004527 | 3  | 51   |
| [GO:0051146] striated muscle cell differentiation                                  | 9  | 0.004797 | 2  | 16   |
| [GO:0030516] regulation of axon extension                                          | 29 | 0.004797 | 2  | 16   |
| [GO:0006461] protein complex assembly                                              | 6  | 0.004964 | 7  | 318  |
| [GO:0048741] skeletal muscle fiber development                                     | 8  | 0.005045 | 3  | 53   |
| [GO:0048747] muscle fiber development                                              | 5  | 0.005045 | 3  | 53   |
| [GO:0048637] skeletal muscle development                                           | 6  | 0.005885 | 3  | 56   |
| [GO:0051656] establishment of organelle localization                               | 5  | 0.006064 | 2  | 18   |
| [GO:0042219] amino acid derivative catabolism                                      | 11 | 0.006064 | 2  | 18   |
| [GO:0001747] eye development (sensu Mammalia)                                      | 7  | 0.006489 | 3  | 58   |

|                                                                   |    |          |   |     |
|-------------------------------------------------------------------|----|----------|---|-----|
| [GO:0021592] fourth ventricle development                         | 10 | 0.006541 | 1 | 1   |
| [GO:0015886] heme transport                                       | 8  | 0.006541 | 1 | 1   |
| [GO:0030328] prenylcysteine catabolism                            | 26 | 0.006541 | 1 | 1   |
| [GO:0030837] negative regulation of actin filament polymerization | 33 | 0.006541 | 1 | 1   |
| [GO:0021591] ventricular system development                       | 8  | 0.006541 | 1 | 1   |
| [GO:0030329] prenylcysteine metabolism                            | 9  | 0.006541 | 1 | 1   |
| [GO:0055013] cardiac muscle cell development                      | 5  | 0.006541 | 1 | 1   |
| [GO:0030240] muscle thin filament assembly                        | 30 | 0.006541 | 1 | 1   |
| [GO:0051295] establishment of meiotic spindle localization        | 19 | 0.006541 | 1 | 1   |
| [GO:0055003] cardiac myofibril assembly                           | 29 | 0.006541 | 1 | 1   |
| [GO:0021678] third ventricle development                          | 9  | 0.006541 | 1 | 1   |
| [GO:0042989] sequestering of actin monomers                       | 38 | 0.006541 | 1 | 1   |
| [GO:0007132] meiotic metaphase I                                  | 11 | 0.006541 | 1 | 1   |
| [GO:0021670] lateral ventricle development                        | 11 | 0.006541 | 1 | 1   |
| [GO:0048628] myoblast maturation                                  | 17 | 0.006749 | 2 | 19  |
| [GO:0051169] nuclear transport                                    | 11 | 0.007116 | 4 | 116 |
| [GO:0043010] eye development (sensu Vertebrata)                   | 6  | 0.007129 | 3 | 60  |
| [GO:0001568] blood vessel development                             | 5  | 0.007425 | 5 | 185 |
| [GO:0048627] myoblast development                                 | 14 | 0.007467 | 2 | 20  |
| [GO:0001944] vasculature development                              | 4  | 0.007931 | 5 | 188 |
| [GO:0016192] vesicle-mediated transport                           | 7  | 0.00819  | 8 | 438 |
| [GO:0009206] purine ribonucleoside triphosphate biosynthesis      | 25 | 0.008518 | 3 | 64  |
| [GO:0009145] purine nucleoside triphosphate biosynthesis          | 17 | 0.008518 | 3 | 64  |
| [GO:0006334] nucleosome assembly                                  | 21 | 0.008713 | 4 | 123 |
| [GO:0009201] ribonucleoside triphosphate biosynthesis             | 17 | 0.008888 | 3 | 65  |
| [GO:0048675] axon extension                                       | 24 | 0.009001 | 2 | 22  |
| [GO:0009611] response to wounding                                 | 4  | 0.009672 | 7 | 361 |
