# Supplementary material
Source: PubMed Central journal article supplement (PMC2972971)
Supplement: 1013555107_st05.pdf [file 1013555107_st05.pdf]

**Supplemental table S5.** List of the 722 significantly altered genes with relative fold change of expression between CNA and WT mice (Log<sub>2</sub> scale).

| <b>Gene</b> | <b>log<sub>2</sub>(Fold change)</b> |
|-------------|-------------------------------------|
| Ces3        | -4.60                               |
| Emilin2     | -2.66                               |
| Cenpf       | -2.52                               |
| Efnb3       | -2.50                               |
| Kcnj3       | -2.48                               |
| Tmprss13    | -2.36                               |
| Pla2g5      | -2.30                               |
| Il15        | -2.27                               |
| Car14       | -2.26                               |
| Till1       | -2.16                               |
| Entpd5      | -2.12                               |
| Acsl6       | -2.05                               |
| Rpl3l       | -2.00                               |
| Slc38a4     | -2.00                               |
| Egf         | -1.86                               |
| Aqp7        | -1.81                               |
| Pfkfb1      | -1.81                               |
| Dhrs7c      | -1.79                               |
| Apbb1       | -1.79                               |
| Mif1        | -1.78                               |
| Tnfaip8     | -1.77                               |
| Asb15       | -1.76                               |
| Car4        | -1.76                               |
| A2bp1       | -1.74                               |
| Phkg1       | -1.74                               |
| Lingo3      | -1.74                               |
| Tbc1d10c    | -1.72                               |
| Amy1        | -1.72                               |
| Mtr         | -1.72                               |
| Dsg2        | -1.71                               |
| Hnmt        | -1.70                               |
| Lad1        | -1.70                               |
| Myh6        | -1.66                               |
| Maob        | -1.66                               |
| Tmod4       | -1.66                               |
| Lamb3       | -1.64                               |
| Kcnd2       | -1.62                               |
| Mpped2      | -1.61                               |
| Wnk2        | -1.58                               |
| Cadm4       | -1.56                               |
| Cmtm8       | -1.55                               |
| Slc16a7     | -1.54                               |
| Slc2a12     | -1.53                               |

|         |       |
|---------|-------|
| Kcnv2   | -1.52 |
| Acot1   | -1.51 |
| Whrn    | -1.51 |
| Gpt     | -1.49 |
| Ano10   | -1.49 |
| Lpin1   | -1.49 |
| Cish    | -1.48 |
| Ift81   | -1.46 |
| Cobll1  | -1.44 |
| Gstk1   | -1.43 |
| Ano4    | -1.41 |
| Dgat2   | -1.40 |
| Retnla  | -1.40 |
| Nt5dc2  | -1.39 |
| S1pr3   | -1.39 |
| Scn5a   | -1.38 |
| Ptgds   | -1.38 |
| Mmp15   | -1.38 |
| Npc1    | -1.38 |
| Bcl2l11 | -1.38 |
| Fabp4   | -1.37 |
| Cmb1    | -1.36 |
| Doc2g   | -1.35 |
| Slc7a1  | -1.35 |
| Vwc2    | -1.34 |
| Paqr9   | -1.34 |
| Acaa2   | -1.34 |
| Fbp2    | -1.33 |
| Mal     | -1.33 |
| Coro1c  | -1.33 |
| Cd300lg | -1.33 |
| Asb14   | -1.33 |
| Pex11a  | -1.32 |
| Dsc2    | -1.32 |
| Fah     | -1.32 |
| Fndc5   | -1.32 |
| Ephb1   | -1.31 |
| Ryr2    | -1.29 |
| Mreg    | -1.28 |
| Kcne1   | -1.28 |
| Sord    | -1.28 |
| Camk2a  | -1.26 |
| Fkbp4   | -1.26 |
| Ucp3    | -1.25 |
| Rmnd1   | -1.25 |
| Prrg1   | -1.25 |
| Slc36a2 | -1.25 |
| Mdga1   | -1.25 |

|         |       |
|---------|-------|
| Cpeb3   | -1.24 |
| Apba3   | -1.24 |
| Fmn1    | -1.24 |
| Timp4   | -1.22 |
| Adra1b  | -1.22 |
| Ezr     | -1.20 |
| Gpr22   | -1.20 |
| Hamp    | -1.20 |
| Pde1c   | -1.20 |
| Gdap10  | -1.20 |
| Prei4   | -1.20 |
| Eepd1   | -1.19 |
| M6prbp1 | -1.19 |
| Obscn   | -1.19 |
| Hisppd1 | -1.17 |
| Vtn     | -1.17 |
| Nhsl1   | -1.16 |
| Crhr2   | -1.16 |
| Actr3b  | -1.16 |
| Agpat3  | -1.15 |
| Decr1   | -1.15 |
| Myo1b   | -1.15 |
| Hopx    | -1.15 |
| Hhatl   | -1.14 |
| Efemp1  | -1.13 |
| Hook1   | -1.13 |
| Nampt   | -1.13 |
| Myom2   | -1.13 |
| Adhfe1  | -1.13 |
| Yipf7   | -1.12 |
| Pde3a   | -1.12 |
| Syt7    | -1.12 |
| Psme1   | -1.12 |
| Plekhh1 | -1.11 |
| Impa2   | -1.11 |
| Celsr1  | -1.11 |
| Dci     | -1.11 |
| Ceacam1 | -1.10 |
| C1qtnf4 | -1.10 |
| Fdft1   | -1.10 |
| Abcc9   | -1.09 |
| Prepl   | -1.09 |
| Klhl23  | -1.08 |
| Htra1   | -1.08 |
| Pfkfb2  | -1.08 |
| Slc27a1 | -1.08 |
| Ccl11   | -1.08 |
| Egflam  | -1.08 |

|          |       |
|----------|-------|
| Gpr116   | -1.07 |
| Hlf      | -1.07 |
| Ung      | -1.07 |
| Gchfr    | -1.07 |
| Ccbl1    | -1.06 |
| Slc40a1  | -1.06 |
| Epas1    | -1.06 |
| Zfp30    | -1.05 |
| Nrp1     | -1.05 |
| Aldh5a1  | -1.05 |
| Dbh      | -1.04 |
| Rasgrp3  | -1.03 |
| Fgf13    | -1.02 |
| Rragd    | -1.02 |
| Rasgrp2  | -1.01 |
| Sod2     | -1.01 |
| Ogdh     | -1.01 |
| Slc9a2   | -1.01 |
| Mrgprh   | -1.01 |
| Opn4     | -1.01 |
| Pitpnc1  | -1.01 |
| Kdr      | -1.01 |
| Stk39    | -1.01 |
| Penk1    | -1.01 |
| Adamts7  | -1.01 |
| Pank1    | -1.00 |
| Itpr2    | -1.00 |
| Eno3     | -1.00 |
| Gnmt     | -1.00 |
| Stt3a    | 1.00  |
| Spred1   | 1.00  |
| Ankrd23  | 1.00  |
| Sorbs2   | 1.00  |
| Rab23    | 1.00  |
| Cnpy4    | 1.00  |
| Hr       | 1.00  |
| Flt3l    | 1.01  |
| Cpeb1    | 1.01  |
| Slc25a36 | 1.01  |
| Ccl12    | 1.01  |
| Scpep1   | 1.01  |
| Spcs3    | 1.01  |
| Kif26b   | 1.01  |
| Mpp7     | 1.01  |
| Wdr17    | 1.01  |
| Itgb1    | 1.01  |
| Armcx2   | 1.01  |
| Tuba1a   | 1.02  |

|          |      |
|----------|------|
| Slc1a1   | 1.02 |
| Cacna2d1 | 1.02 |
| Tyrobp   | 1.02 |
| Pqlc3    | 1.02 |
| Fxyd5    | 1.02 |
| Fer1l3   | 1.02 |
| Cobl     | 1.02 |
| Col5a1   | 1.02 |
| Acot9    | 1.02 |
| Maff     | 1.02 |
| Vcam1    | 1.02 |
| C1r      | 1.02 |
| Basp1    | 1.02 |
| Myo5a    | 1.02 |
| Rnd1     | 1.02 |
| Atp8a2   | 1.03 |
| Sh3bgrl  | 1.03 |
| Zfp37    | 1.03 |
| Hectd2   | 1.03 |
| Msn      | 1.03 |
| Atp6v1h  | 1.03 |
| Dnm1     | 1.03 |
| Ctss     | 1.03 |
| Usp47    | 1.03 |
| Fkbp7    | 1.03 |
| Dact1    | 1.03 |
| Sphk1    | 1.03 |
| Tmed3    | 1.03 |
| Zfp423   | 1.03 |
| Pcgf6    | 1.04 |
| Nudt18   | 1.04 |
| Creb3l2  | 1.04 |
| Gas5     | 1.04 |
| Pdlim7   | 1.04 |
| Peg3     | 1.04 |
| Dzip1    | 1.05 |
| Stxbp1   | 1.05 |
| Atp6ap2  | 1.05 |
| Sesn3    | 1.05 |
| Hebp2    | 1.05 |
| Marcks   | 1.05 |
| Pftk1    | 1.06 |
| Spsb4    | 1.06 |
| Dact3    | 1.06 |
| Apod     | 1.06 |
| C1qb     | 1.06 |
| Igfbp3   | 1.06 |
| P2ry2    | 1.06 |

|         |      |
|---------|------|
| Bambi   | 1.06 |
| Plekha4 | 1.06 |
| Ccnd2   | 1.07 |
| Tgfb2   | 1.07 |
| Itm2a   | 1.07 |
| Igsf3   | 1.07 |
| Col4a5  | 1.07 |
| Scarf2  | 1.07 |
| P2rx7   | 1.08 |
| Actn1   | 1.08 |
| Emp3    | 1.08 |
| Spg3a   | 1.08 |
| Shisa4  | 1.08 |
| Ckb     | 1.08 |
| Smc4    | 1.08 |
| Fads1   | 1.08 |
| Ogn     | 1.08 |
| Zfp354c | 1.08 |
| Akr1b8  | 1.08 |
| Rasl11b | 1.09 |
| Pdpr    | 1.09 |
| Id3     | 1.09 |
| Ptprad2 | 1.09 |
| Col6a2  | 1.09 |
| Lnx1    | 1.09 |
| Sucnr1  | 1.09 |
| Kif5b   | 1.10 |
| Popdc3  | 1.10 |
| Scd1    | 1.10 |
| Pscn    | 1.10 |
| Anxa3   | 1.10 |
| Mtap1b  | 1.10 |
| Fmo5    | 1.10 |
| Trf     | 1.10 |
| Pde1a   | 1.11 |
| Star    | 1.11 |
| Thsd7a  | 1.11 |
| Dclk1   | 1.11 |
| Gadd45g | 1.11 |
| Nova1   | 1.11 |
| Slc7a2  | 1.11 |
| Mical2  | 1.11 |
| Anxa5   | 1.12 |
| Slc35a2 | 1.12 |
| Matn2   | 1.12 |
| Gulp1   | 1.12 |
| Bdh1    | 1.12 |
| Cdr2    | 1.12 |

|          |      |
|----------|------|
| Tmod2    | 1.12 |
| Tmem176a | 1.12 |
| Tspo     | 1.12 |
| A2m      | 1.12 |
| Hrasls3  | 1.12 |
| Rassf5   | 1.12 |
| Anxa4    | 1.12 |
| Vwa1     | 1.12 |
| Arpc1b   | 1.13 |
| Fzd1     | 1.13 |
| Ccdc80   | 1.13 |
| Sema3b   | 1.13 |
| Zdhhc9   | 1.13 |
| P2ry6    | 1.13 |
| Mamdc2   | 1.13 |
| Ptplb    | 1.13 |
| Omd      | 1.13 |
| Sumf1    | 1.14 |
| Ace      | 1.14 |
| Csf2ra   | 1.14 |
| Pycr1    | 1.14 |
| Sync     | 1.14 |
| Irf6     | 1.14 |
| Loxl3    | 1.14 |
| Serping1 | 1.14 |
| Ndr4     | 1.14 |
| Icam1    | 1.14 |
| Cnn3     | 1.15 |
| Procr    | 1.15 |
| Arid5a   | 1.15 |
| Dusp6    | 1.15 |
| Igfbp4   | 1.15 |
| Nucb2    | 1.15 |
| EG634650 | 1.15 |
| Rab31    | 1.16 |
| Hexb     | 1.16 |
| Clec11a  | 1.16 |
| Efhd2    | 1.16 |
| Dbn1     | 1.16 |
| Anxa2    | 1.16 |
| Akap2    | 1.16 |
| Vit      | 1.16 |
| Bmx      | 1.16 |
| Ttc8     | 1.16 |
| Uchl1    | 1.16 |
| Lyve1    | 1.16 |
| Mtpn     | 1.16 |
| Strn     | 1.17 |

|          |      |
|----------|------|
| Hsp90aa1 | 1.17 |
| Cd55     | 1.17 |
| Ckap4    | 1.17 |
| Lgals1   | 1.17 |
| Crem     | 1.17 |
| Scd2     | 1.17 |
| Snhg1    | 1.17 |
| Hspa1l   | 1.17 |
| Twist1   | 1.17 |
| Fzd7     | 1.17 |
| Npdc1    | 1.17 |
| Plcb4    | 1.17 |
| Dpep1    | 1.18 |
| Sparc    | 1.18 |
| Aff3     | 1.18 |
| Nelf     | 1.18 |
| Pkd2     | 1.18 |
| Ddah1    | 1.18 |
| Ppap2a   | 1.18 |
| Nedd9    | 1.18 |
| Phlda3   | 1.18 |
| Plat     | 1.19 |
| Laptm5   | 1.19 |
| Cnksr1   | 1.20 |
| Synpo2   | 1.20 |
| Vat1     | 1.20 |
| Snai2    | 1.20 |
| Picalm   | 1.20 |
| Robo1    | 1.20 |
| Ephx1    | 1.20 |
| Smad6    | 1.20 |
| Dnm3os   | 1.20 |
| Slitrk4  | 1.20 |
| Ifrd1    | 1.20 |
| Timp2    | 1.20 |
| Cks2     | 1.20 |
| Cald1    | 1.20 |
| Eif1a    | 1.21 |
| Atp13a3  | 1.21 |
| Rab3il1  | 1.21 |
| Thbs3    | 1.21 |
| Cebpd    | 1.21 |
| Slc1a3   | 1.21 |
| Itgb5    | 1.22 |
| Col6a1   | 1.22 |
| Slc39a6  | 1.22 |
| Spon2    | 1.22 |
| Cotl1    | 1.23 |



|          |      |
|----------|------|
| Skil     | 1.23 |
| Fat1     | 1.23 |
| Ptgs2    | 1.23 |
| Ccdc104  | 1.23 |
| Adam9    | 1.23 |
| Etv1     | 1.24 |
| Scx      | 1.24 |
| Ston1    | 1.24 |
| Txndc5   | 1.24 |
| B3galnt1 | 1.24 |
| Mmp23    | 1.24 |
| Cpne8    | 1.24 |
| Scara3   | 1.24 |
| Kank1    | 1.24 |
| Cst3     | 1.24 |
| Cks1b    | 1.24 |
| Sln      | 1.25 |
| Mgat4a   | 1.25 |
| Clic5    | 1.25 |
| Selm     | 1.25 |
| Irs1     | 1.25 |
| Col3a1   | 1.25 |
| Vim      | 1.26 |
| Zwint    | 1.26 |
| Tgm2     | 1.26 |
| Mark1    | 1.26 |
| Serpine2 | 1.26 |
| Ctla2b   | 1.26 |
| Bdnf     | 1.27 |
| Adamts12 | 1.27 |
| Axl      | 1.27 |
| Zscan18  | 1.27 |
| Hip1     | 1.28 |
| Comt1    | 1.28 |
| Vkorc1   | 1.28 |
| Lox      | 1.28 |
| Itga9    | 1.28 |
| Adamts2  | 1.28 |
| Cyr61    | 1.29 |
| Rnase4   | 1.29 |
| Ptgfrn   | 1.29 |
| Bace2    | 1.29 |
| Gp1bb    | 1.29 |
| Tsc22d1  | 1.29 |
| Enah     | 1.30 |
| Leprel2  | 1.30 |
| Trps1    | 1.30 |
| Rcn1     | 1.31 |

|         |      |
|---------|------|
| S100a10 | 1.31 |
| Gdf15   | 1.31 |
| Uck2    | 1.31 |
| Odz3    | 1.32 |
| Tspan17 | 1.32 |
| B3gnt9  | 1.32 |
| Plk2    | 1.32 |
| Tmem119 | 1.32 |
| Ereg    | 1.32 |
| Fez2    | 1.32 |
| Sh3d19  | 1.32 |
| Kcnj14  | 1.32 |
| Prkab2  | 1.32 |
| Pcdh9   | 1.33 |
| Rgs18   | 1.33 |
| Naalad2 | 1.33 |
| Mpa2l   | 1.33 |
| Cspg4   | 1.33 |
| Pdgfra  | 1.34 |
| Lmna    | 1.35 |
| Nrtn    | 1.35 |
| Emilin1 | 1.35 |
| Dpysl3  | 1.35 |
| Fn1     | 1.35 |
| Bmp4    | 1.35 |
| Carhsp1 | 1.35 |
| Nfkbiz  | 1.35 |
| Fstl3   | 1.35 |
| Krt80   | 1.36 |
| Arfgap3 | 1.36 |
| Ltbp3   | 1.36 |
| Lpar1   | 1.37 |
| S100a11 | 1.37 |
| Apcdd1  | 1.37 |
| Chsy1   | 1.37 |
| Cyfip2  | 1.37 |
| Kdelr3  | 1.37 |
| Casp12  | 1.38 |
| Ifi27   | 1.38 |
| Pdgfc   | 1.38 |
| Fzd2    | 1.39 |
| Dmn     | 1.39 |
| Bicc1   | 1.39 |
| Endod1  | 1.40 |
| Fbn1    | 1.40 |
| Ahnak2  | 1.41 |
| Fzd9    | 1.42 |
| Lhfp    | 1.42 |

|           |      |
|-----------|------|
| Lrp1      | 1.42 |
| Col4a4    | 1.42 |
| Ppm1e     | 1.43 |
| Lum       | 1.43 |
| Foxp2     | 1.43 |
| Dzip3     | 1.43 |
| Hpgd      | 1.43 |
| Fbln5     | 1.43 |
| Cacnb1    | 1.44 |
| Reck      | 1.44 |
| Ddef2     | 1.45 |
| Nkd2      | 1.45 |
| Soat1     | 1.45 |
| Serpina3n | 1.46 |
| Ifi202b   | 1.47 |
| F2r       | 1.47 |
| Srpx2     | 1.47 |
| Tlr4      | 1.47 |
| Cd24a     | 1.48 |
| P4ha1     | 1.48 |
| Clca1     | 1.48 |
| Prelp     | 1.49 |
| Meig1     | 1.49 |
| Eln       | 1.50 |
| Il17d     | 1.50 |
| Cygb      | 1.51 |
| Otud1     | 1.51 |
| Dap       | 1.51 |
| Vasn      | 1.51 |
| Ifit2     | 1.52 |
| Mrc2      | 1.52 |
| Tmem45a   | 1.52 |
| Dsel      | 1.52 |
| Ecm1      | 1.52 |
| Nuak1     | 1.52 |
| Cd9       | 1.52 |
| Ass1      | 1.52 |
| Ctsz      | 1.53 |
| Tcf21     | 1.53 |
| Stk32b    | 1.53 |
| Tubb2b    | 1.53 |
| Gpm6a     | 1.54 |
| Fgl2      | 1.55 |
| Gpnmb     | 1.55 |
| Lrrcc1    | 1.55 |
| Chn2      | 1.55 |
| Pde10a    | 1.56 |
| Pmepa1    | 1.56 |

|          |      |
|----------|------|
| Crispld2 | 1.56 |
| Igfbp7   | 1.56 |
| Gabra3   | 1.57 |
| Mxra8    | 1.57 |
| Enpp1    | 1.57 |
| S100a4   | 1.57 |
| Wif1     | 1.57 |
| Pmp22    | 1.57 |
| Fgf6     | 1.58 |
| Kcnk2    | 1.58 |
| Itgb1bp3 | 1.58 |
| Kif5c    | 1.58 |
| Olfml1   | 1.59 |
| Hspa1a   | 1.59 |
| Fbln1    | 1.60 |
| Plvap    | 1.60 |
| Col4a3   | 1.61 |
| Mgat5b   | 1.61 |
| Antxr1   | 1.62 |
| Tll7     | 1.62 |
| Ptger4   | 1.62 |
| Etv5     | 1.62 |
| Mmp2     | 1.62 |
| Col14a1  | 1.62 |
| Runx2    | 1.62 |
| Dio2     | 1.62 |
| Id2      | 1.62 |
| Dynll1   | 1.63 |
| Pcolce   | 1.63 |
| Bcl2     | 1.63 |
| Tmem158  | 1.64 |
| Vcan     | 1.65 |
| Col11a1  | 1.65 |
| Gpm6b    | 1.65 |
| Islr     | 1.65 |
| Flrt2    | 1.65 |
| Nupr1    | 1.66 |
| Crispld1 | 1.66 |
| Trim47   | 1.66 |
| Lmcd1    | 1.67 |
| Mxra7    | 1.67 |
| Tmem195  | 1.67 |
| Lrrc52   | 1.68 |
| Slc5a3   | 1.68 |
| Thbs1    | 1.68 |
| Nbl1     | 1.69 |
| Col1a1   | 1.71 |
| Fhl1     | 1.71 |

|           |      |
|-----------|------|
| Rcn3      | 1.71 |
| Abat      | 1.72 |
| Ctla2a    | 1.73 |
| Acta2     | 1.73 |
| Myoc      | 1.73 |
| Svep1     | 1.73 |
| Lhfp12    | 1.73 |
| Reln      | 1.73 |
| Capg      | 1.74 |
| Ldlrad3   | 1.74 |
| Fgfr1     | 1.75 |
| S100a6    | 1.76 |
| Col5a2    | 1.76 |
| Pdgfr1    | 1.76 |
| Tnnt1     | 1.77 |
| Cd302     | 1.77 |
| Crim1     | 1.77 |
| Egr2      | 1.77 |
| Il33      | 1.78 |
| Fst       | 1.78 |
| Prss23    | 1.79 |
| Sfrp1     | 1.79 |
| Cyp1b1    | 1.80 |
| Csrp2     | 1.80 |
| Tnfrsf12a | 1.80 |
| Iqgap2    | 1.81 |
| Fbln2     | 1.82 |
| Anxa1     | 1.82 |
| Mmrn1     | 1.82 |
| Synpo2l   | 1.83 |
| Sertad4   | 1.84 |
| Serpine1  | 1.86 |
| Pcolce2   | 1.86 |
| Hbegf     | 1.86 |
| Colec12   | 1.86 |
| Loxl1     | 1.86 |
| Nppa      | 1.86 |
| Amot      | 1.86 |
| Cp        | 1.87 |
| Krt18     | 1.87 |
| Fmod      | 1.87 |
| Cst6      | 1.88 |
| Casc4     | 1.89 |
| Aldh1a1   | 1.90 |
| Mum1l1    | 1.90 |
| Myh10     | 1.91 |
| Dse       | 1.92 |
| Cdh11     | 1.92 |

|          |      |
|----------|------|
| Frem1    | 1.93 |
| Plagl1   | 1.93 |
| Sulf1    | 1.94 |
| Rab40b   | 1.94 |
| Rcan1    | 1.94 |
| Milt11   | 1.95 |
| Qpct     | 1.96 |
| Cnnm2    | 1.97 |
| Rtn4     | 1.97 |
| Myl9     | 1.98 |
| Pdlim5   | 1.99 |
| Col12a1  | 1.99 |
| Myot     | 2.00 |
| Ptgis    | 2.00 |
| Pi16     | 2.01 |
| Nox4     | 2.01 |
| Prg4     | 2.01 |
| Rpgr     | 2.02 |
| Tmem100  | 2.02 |
| Itih5    | 2.02 |
| Tgfb1    | 2.03 |
| Ptgr     | 2.03 |
| Lbp      | 2.03 |
| Wisp2    | 2.04 |
| Nppb     | 2.04 |
| Mgp      | 2.04 |
| Col1a2   | 2.05 |
| Bgn      | 2.05 |
| Adcy7    | 2.05 |
| Abra     | 2.05 |
| Gpx3     | 2.06 |
| Pak3     | 2.06 |
| Pmm1     | 2.07 |
| Nt5e     | 2.07 |
| Tpbp     | 2.07 |
| Serpinf1 | 2.08 |
| Kcnq5    | 2.08 |
| Olfml3   | 2.08 |
| Plod2    | 2.13 |
| Cfh      | 2.14 |
| Hspa1b   | 2.16 |
| Dct      | 2.16 |
| Vwf      | 2.17 |
| Vgll3    | 2.18 |
| Fstl1    | 2.19 |
| Mmp12    | 2.19 |
| Ltbp2    | 2.20 |
| Tubb2a   | 2.20 |

|               |      |
|---------------|------|
| Pdlim2        | 2.21 |
| Emp1          | 2.21 |
| Col8a1        | 2.22 |
| Cyt11         | 2.24 |
| Igfbp6        | 2.25 |
| Synpo         | 2.27 |
| Igsf1         | 2.28 |
| E430002G05Rik | 2.29 |
| Capn3         | 2.32 |
| Lgals3        | 2.33 |
| Nlrc3         | 2.42 |
| Cd44          | 2.43 |
| Dkk3          | 2.46 |
| Pla2g4a       | 2.47 |
| Frzb          | 2.47 |
| Mfap5         | 2.50 |
| Mfap4         | 2.52 |
| Ror2          | 2.55 |
| Grk5          | 2.61 |
| Hmgn3         | 2.64 |
| Id4           | 2.66 |
| Sema3d        | 2.67 |
| Gcnt1         | 2.67 |
| Timp1         | 2.69 |
| Casq1         | 2.73 |
| Acta1         | 2.75 |
| Comp          | 2.81 |
| Edn3          | 2.82 |
| Crif1         | 2.90 |
| Meox1         | 2.94 |
| Myl1          | 2.94 |
| Egr3          | 2.98 |
| Fxyd6         | 2.99 |
| Col8a2        | 3.02 |
| Chodl         | 3.05 |
| Tgfb2         | 3.13 |
| Npr3          | 3.18 |
| Ptn           | 3.22 |
| Shisa3        | 3.22 |
| Aspn          | 3.23 |
| Itgb1         | 3.27 |
| Postn         | 3.29 |
| Rbp1          | 3.30 |
| Ctgf          | 3.30 |
| Leprel1       | 3.33 |
| Thbs4         | 3.35 |
| Tgfb3         | 3.35 |
| Dkk2          | 3.39 |

|         |      |
|---------|------|
| Spp1    | 3.52 |
| Sfrp2   | 3.54 |
| Ppp1r1c | 3.65 |
| Myh7    | 3.80 |
| Tnmd    | 3.86 |
| Cilp    | 4.35 |
| Tpm2    | 4.55 |
