# Supplementary material
Source: PubMed Central journal article supplement (PMC2972971)
Supplement: 1013555107_st06.pdf [file 1013555107_st06.pdf]

**Supplemental table S6.** GO terms significantly enriched in significantly downregulated genes of the microarray. K: number of genes from the input cluster in the given category. F: number of total genes in the given category.

| Biological Process GO Terms: Over Representation   | Sorting Results by: the p-Value in an ascending order. |          |     |       |
|----------------------------------------------------|--------------------------------------------------------|----------|-----|-------|
|                                                    | GO Level                                               | p-value  | k   | f     |
| [GO:0008150] biological_process                    | 0                                                      | 3.41E-12 | 140 | 16056 |
| [GO:0051179] localization                          | 2                                                      | 1.69E-07 | 46  | 2975  |
| [GO:0019752] carboxylic acid metabolism            | 7                                                      | 2.22E-07 | 17  | 521   |
| [GO:0006082] organic acid metabolism               | 6                                                      | 2.28E-07 | 17  | 522   |
| [GO:0006066] alcohol metabolism                    | 6                                                      | 2.74E-07 | 13  | 300   |
| [GO:0051234] establishment of localization         | 3                                                      | 8.48E-07 | 44  | 2935  |
| [GO:0006810] transport                             | 6                                                      | 3.03E-06 | 39  | 2558  |
| [GO:0007582] physiological process                 | 1                                                      | 7.27E-06 | 119 | 13342 |
| [GO:0050875] cellular physiological process        | 3                                                      | 1.33E-05 | 103 | 10888 |
| [GO:0006812] cation transport                      | 8                                                      | 1.80E-05 | 14  | 506   |
| [GO:0008542] visual learning                       | 9                                                      | 2.00E-05 | 3   | 8     |
| [GO:0009987] cellular process                      | 1                                                      | 2.08E-05 | 121 | 13877 |
| [GO:0006629] lipid metabolism                      | 4                                                      | 2.35E-05 | 16  | 662   |
| [GO:0006631] fatty acid metabolism                 | 11                                                     | 3.28E-05 | 8   | 170   |
| [GO:0030001] metal ion transport                   | 9                                                      | 3.37E-05 | 12  | 400   |
| [GO:0007275] development                           | 1                                                      | 3.56E-05 | 36  | 2523  |
| [GO:0001505] regulation of neurotransmitter levels | 9                                                      | 4.78E-05 | 6   | 90    |
| [GO:0044255] cellular lipid metabolism             | 8                                                      | 4.86E-05 | 14  | 554   |
| [GO:0000303] response to superoxide                | 13                                                     | 5.16E-05 | 2   | 2     |
| [GO:0007632] visual behavior                       | 6                                                      | 5.80E-05 | 3   | 11    |
| [GO:0006000] fructose metabolism                   | 13                                                     | 9.95E-05 | 3   | 13    |
| [GO:0015672] monovalent inorganic cation transport | 9                                                      | 0.000117 | 10  | 322   |
| [GO:0007267] cell-cell signaling                   | 3                                                      | 0.000118 | 13  | 528   |
| [GO:0042752] regulation of circadian rhythm        | 6                                                      | 0.000154 | 2   | 3     |
| [GO:0000305] response to oxygen radical            | 12                                                     | 0.000154 | 2   | 3     |

|                                                                  |    |          |    |      |
|------------------------------------------------------------------|----|----------|----|------|
| [GO:0001975] response to amphetamine                             | 4  | 0.000154 | 2  | 3    |
| [GO:0005975] carbohydrate metabolism                             | 5  | 0.000186 | 12 | 479  |
| [GO:0044262] cellular carbohydrate metabolism                    | 6  | 0.00027  | 10 | 357  |
| [GO:0006003] fructose 2,6-bisphosphate metabolism                | 14 | 0.000307 | 2  | 4    |
| [GO:0009314] response to radiation                               | 3  | 0.000317 | 5  | 82   |
| [GO:0010033] response to organic substance                       | 3  | 0.000327 | 3  | 19   |
| [GO:0006811] ion transport                                       | 7  | 0.000347 | 15 | 751  |
| [GO:0048856] anatomical structure development                    | 2  | 0.000434 | 28 | 1998 |
| [GO:0043279] response to alkaloid                                | 4  | 0.000509 | 2  | 5    |
| [GO:0048468] cell development                                    | 4  | 0.00074  | 11 | 481  |
| [GO:0019751] polyol metabolism                                   | 7  | 0.000751 | 3  | 25   |
| [GO:0001974] blood vessel remodeling                             | 12 | 0.00076  | 2  | 6    |
| [GO:0030154] cell differentiation                                | 3  | 0.00078  | 18 | 1081 |
| [GO:0007610] behavior                                            | 2  | 0.000871 | 9  | 343  |
| [GO:0048514] blood vessel morphogenesis                          | 8  | 0.001044 | 6  | 159  |
| [GO:0045176] apical protein localization                         | 5  | 0.001059 | 2  | 7    |
| [GO:0009416] response to light stimulus                          | 4  | 0.001109 | 4  | 63   |
| [GO:0007512] adult heart development                             | 7  | 0.001405 | 2  | 8    |
| [GO:0007612] learning                                            | 4  | 0.001423 | 3  | 31   |
| [GO:0019318] hexose metabolism                                   | 12 | 0.001428 | 6  | 169  |
| [GO:0019226] transmission of nerve impulse                       | 7  | 0.001552 | 8  | 301  |
| [GO:0046942] carboxylic acid transport                           | 8  | 0.001557 | 4  | 69   |
| [GO:0015849] organic acid transport                              | 7  | 0.001642 | 4  | 70   |
| [GO:0005996] monosaccharide metabolism                           | 11 | 0.001657 | 6  | 174  |
| [GO:0015980] energy derivation by oxidation of organic compounds | 7  | 0.001706 | 6  | 175  |
| [GO:0046928] regulation of neurotransmitter secretion            | 21 | 0.001798 | 2  | 9    |
| [GO:0030534] adult behavior                                      | 3  | 0.001864 | 3  | 34   |
| [GO:0007286] spermatid development                               | 11 | 0.002201 | 3  | 36   |
| [GO:0042135] neurotransmitter catabolism                         | 16 | 0.002237 | 2  | 10   |
| [GO:0008105] asymmetric protein localization                     | 4  | 0.002237 | 2  | 10   |
| [GO:0001568] blood vessel development                            | 5  | 0.002256 | 6  | 185  |
| [GO:0001944] vasculature development                             | 4  | 0.002445 | 6  | 188  |

|                                                                |    |          |    |      |
|----------------------------------------------------------------|----|----------|----|------|
| [GO:0048515] spermatid differentiation                         | 9  | 0.002573 | 3  | 38   |
| [GO:0016049] cell growth                                       | 11 | 0.002612 | 5  | 131  |
| [GO:0042592] homeostasis                                       | 2  | 0.002697 | 8  | 329  |
| [GO:0006936] muscle contraction                                | 3  | 0.002788 | 5  | 133  |
| [GO:0007411] axon guidance                                     | 30 | 0.002804 | 4  | 81   |
| [GO:0007268] synaptic transmission                             | 8  | 0.002888 | 7  | 261  |
| [GO:0008361] regulation of cell size                           | 9  | 0.002974 | 5  | 135  |
| [GO:0042493] response to drug                                  | 3  | 0.003201 | 3  | 41   |
| [GO:0042596] fear response                                     | 3  | 0.003249 | 2  | 12   |
| [GO:0001676] long-chain fatty acid metabolism                  | 12 | 0.003249 | 2  | 12   |
| [GO:0007009] plasma membrane organization and biogenesis       | 6  | 0.003249 | 2  | 12   |
| [GO:0042632] cholesterol homeostasis                           | 3  | 0.003249 | 2  | 12   |
| [GO:0008016] regulation of heart contraction                   | 7  | 0.003429 | 3  | 42   |
| [GO:0007626] locomotory behavior                               | 3  | 0.004023 | 6  | 208  |
| [GO:0009653] morphogenesis                                     | 3  | 0.004391 | 17 | 1166 |
| [GO:0019439] aromatic compound catabolism                      | 9  | 0.004438 | 2  | 14   |
| [GO:0008152] metabolism                                        | 2  | 0.004615 | 75 | 8216 |
| [GO:0042417] dopamine metabolism                               | 24 | 0.005097 | 2  | 15   |
| [GO:0006637] acyl-CoA metabolism                               | 14 | 0.005798 | 2  | 16   |
| [GO:0030048] actin filament-based movement                     | 15 | 0.005798 | 2  | 16   |
| [GO:0007269] neurotransmitter secretion                        | 17 | 0.005935 | 3  | 51   |
| [GO:0000302] response to reactive oxygen species               | 11 | 0.00654  | 2  | 17   |
| [GO:0009628] response to abiotic stimulus                      | 2  | 0.00676  | 5  | 164  |
| [GO:0006865] amino acid transport                              | 10 | 0.006959 | 3  | 54   |
| [GO:0045062] extrathymic T cell selection                      | 20 | 0.007211 | 1  | 1    |
| [GO:0048149] behavioral response to ethanol                    | 7  | 0.007211 | 1  | 1    |
| [GO:0009399] nitrogen fixation                                 | 4  | 0.007211 | 1  | 1    |
| [GO:0051125] regulation of actin nucleation                    | 15 | 0.007211 | 1  | 1    |
| [GO:0006463] steroid hormone receptor complex assembly         | 7  | 0.007211 | 1  | 1    |
| [GO:0045819] positive regulation of glycogen catabolism        | 49 | 0.007211 | 1  | 1    |
| [GO:0031331] positive regulation of cellular catabolism        | 23 | 0.007211 | 1  | 1    |
| [GO:0001315] age-dependent response to reactive oxygen species | 12 | 0.007211 | 1  | 1    |

|                                                                                                    |    |          |   |     |
|----------------------------------------------------------------------------------------------------|----|----------|---|-----|
| [GO:0031329] regulation of cellular catabolism                                                     | 15 | 0.007211 | 1 | 1   |
| [GO:0000147] actin cortical patch assembly                                                         | 11 | 0.007211 | 1 | 1   |
| [GO:0031330] negative regulation of cellular catabolism                                            | 23 | 0.007211 | 1 | 1   |
| [GO:0031000] response to caffeine                                                                  | 6  | 0.007211 | 1 | 1   |
| [GO:0050758] regulation of thymidylate synthase biosynthesis                                       | 26 | 0.007211 | 1 | 1   |
| [GO:0005981] regulation of glycogen catabolism                                                     | 34 | 0.007211 | 1 | 1   |
| [GO:0050757] thymidylate synthase biosynthesis                                                     | 15 | 0.007211 | 1 | 1   |
| [GO:0042309] homiothermy                                                                           | 5  | 0.007211 | 1 | 1   |
| [GO:0043278] response to morphine                                                                  | 6  | 0.007211 | 1 | 1   |
| [GO:0051127] positive regulation of actin nucleation                                               | 21 | 0.007211 | 1 | 1   |
| [GO:0006198] cAMP catabolism                                                                       | 15 | 0.007211 | 1 | 1   |
| [GO:0050802] circadian sleep/wake cycle, sleep                                                     | 11 | 0.007211 | 1 | 1   |
| [GO:0001982] baroreceptor response to lowering of blood pressure                                   | 8  | 0.007211 | 1 | 1   |
| [GO:0001987] vasoconstriction of artery during baroreceptor response to lowering of blood pressure | 11 | 0.007211 | 1 | 1   |
| [GO:0045187] regulation of circadian sleep/wake cycle, sleep                                       | 17 | 0.007211 | 1 | 1   |
| [GO:0006060] sorbitol metabolism                                                                   | 14 | 0.007211 | 1 | 1   |
| [GO:0007522] visceral muscle development                                                           | 5  | 0.007211 | 1 | 1   |
| [GO:0006848] pyruvate transport                                                                    | 10 | 0.007211 | 1 | 1   |
| [GO:0045818] negative regulation of glycogen catabolism                                            | 49 | 0.007211 | 1 | 1   |
| [GO:0050760] negative regulation of thymidylate synthase biosynthesis                              | 37 | 0.007211 | 1 | 1   |
| [GO:0043462] regulation of ATPase activity                                                         | 4  | 0.007211 | 1 | 1   |
| [GO:0042749] regulation of circadian sleep/wake cycle                                              | 15 | 0.007211 | 1 | 1   |
| [GO:0009386] translational attenuation                                                             | 27 | 0.007211 | 1 | 1   |
| [GO:0006813] potassium ion transport                                                               | 11 | 0.007284 | 5 | 167 |
| [GO:0042310] vasoconstriction                                                                      | 5  | 0.007323 | 2 | 18  |
| [GO:0042219] amino acid derivative catabolism                                                      | 11 | 0.007323 | 2 | 18  |
| [GO:0001558] regulation of cell growth                                                             | 17 | 0.008292 | 4 | 110 |
| [GO:0044275] cellular carbohydrate catabolism                                                      | 15 | 0.008292 | 4 | 110 |
| [GO:0016052] carbohydrate catabolism                                                               | 8  | 0.008292 | 4 | 110 |
| [GO:0045055] regulated secretory pathway                                                           | 9  | 0.008478 | 3 | 58  |
| [GO:0006094] gluconeogenesis                                                                       | 27 | 0.009008 | 2 | 20  |

|                                                             |   |          |   |     |
|-------------------------------------------------------------|---|----------|---|-----|
| [GO:0051239] regulation of organismal physiological process | 5 | 0.009446 | 6 | 249 |
| [GO:0006732] coenzyme metabolism                            | 7 | 0.009667 | 5 | 179 |
