# Supplementary material
Source: PubMed Central journal article supplement (PMC2972971)
Supplement: 1013555107_st07.pdf [file 1013555107_st07.pdf]

**Supplemental table S7.** GO terms significantly enriched in significantly up-regulated genes of the microarray. K: number of genes from the input cluster in the given category. F: number of total genes in the given category.

| Biological Process GO Terms: Over Representation       |          | Sorting Results by: the p-Value in an ascending order. |     |       |
|--------------------------------------------------------|----------|--------------------------------------------------------|-----|-------|
| Category                                               | GO Level | p-value                                                | k   | f     |
| [GO:0048856] anatomical structure development          | 2        | 6.66E-16                                               | 150 | 1998  |
| [GO:0001501] skeletal development                      | 4        | 3.77E-15                                               | 30  | 198   |
| [GO:0006817] phosphate transport                       | 10       | 8.99E-15                                               | 20  | 86    |
| [GO:0048513] organ development                         | 3        | 1.18E-14                                               | 96  | 1234  |
| [GO:0007155] cell adhesion                             | 2        | 1.25E-14                                               | 60  | 668   |
| [GO:0000902] cell morphogenesis                        | 8        | 1.43E-14                                               | 43  | 473   |
| [GO:0007275] development                               | 1        | 1.55E-14                                               | 172 | 2523  |
| [GO:0009653] morphogenesis                             | 3        | 2.68E-14                                               | 86  | 1166  |
| [GO:0048519] negative regulation of biological process | 2        | 3.55E-14                                               | 70  | 1043  |
| [GO:0030154] cell differentiation                      | 3        | 4.09E-14                                               | 75  | 1081  |
| [GO:0050789] regulation of biological process          | 1        | 1.77E-13                                               | 164 | 4223  |
| [GO:0050875] cellular physiological process            | 3        | 2.52E-13                                               | 329 | 10888 |
| [GO:0015698] inorganic anion transport                 | 9        | 4.96E-13                                               | 24  | 163   |
| [GO:0048523] negative regulation of cellular process   | 5        | 1.59E-12                                               | 60  | 955   |
| [GO:0008150] biological_process                        | 0        | 1.96E-12                                               | 448 | 16056 |
| [GO:0009987] cellular process                          | 1        | 2.88E-12                                               | 391 | 13877 |
| [GO:0048731] system development                        | 3        | 3.37E-12                                               | 50  | 718   |
| [GO:0007399] nervous system development                | 4        | 8.10E-12                                               | 47  | 662   |
| [GO:0048468] cell development                          | 4        | 1.05E-11                                               | 39  | 481   |
| [GO:0009887] organ morphogenesis                       | 5        | 1.24E-11                                               | 45  | 622   |
| [GO:0007582] physiological process                     | 1        | 1.30E-11                                               | 370 | 13342 |
| [GO:0006820] anion transport                           | 8        | 1.61E-11                                               | 24  | 191   |
| [GO:0051234] establishment of localization             | 3        | 1.79E-11                                               | 122 | 2935  |
| [GO:0051179] localization                              | 2        | 2.04E-11                                               | 123 | 2975  |
| [GO:0008283] cell proliferation                        | 4        | 2.61E-11                                               | 45  | 636   |
| [GO:0001944] vasculature development                   | 4        | 7.41E-11                                               | 23  | 188   |

|                                                                  |    |          |     |      |
|------------------------------------------------------------------|----|----------|-----|------|
| [GO:0007167] enzyme linked receptor protein signaling pathway    | 5  | 1.14E-10 | 28  | 284  |
| [GO:0001568] blood vessel development                            | 5  | 3.35E-10 | 22  | 185  |
| [GO:0043118] negative regulation of physiological process        | 5  | 3.46E-10 | 52  | 871  |
| [GO:0009888] tissue development                                  | 3  | 5.49E-10 | 28  | 304  |
| [GO:0040011] locomotion                                          | 2  | 6.01E-10 | 32  | 390  |
| [GO:0016049] cell growth                                         | 11 | 1.32E-09 | 18  | 131  |
| [GO:0006928] cell motility                                       | 8  | 1.47E-09 | 31  | 382  |
| [GO:0051674] localization of cell                                | 3  | 1.47E-09 | 31  | 382  |
| [GO:0001525] angiogenesis                                        | 9  | 1.70E-09 | 18  | 133  |
| [GO:0007517] muscle development                                  | 4  | 1.70E-09 | 20  | 166  |
| [GO:0008361] regulation of cell size                             | 9  | 2.17E-09 | 18  | 135  |
| [GO:0051239] regulation of organismal physiological process      | 5  | 3.91E-09 | 24  | 249  |
| [GO:0050791] regulation of physiological process                 | 3  | 5.86E-09 | 136 | 3719 |
| [GO:0042060] wound healing                                       | 8  | 6.08E-09 | 15  | 97   |
| [GO:0009611] response to wounding                                | 4  | 6.33E-09 | 29  | 361  |
| [GO:0022008] neurogenesis                                        | 8  | 8.06E-09 | 27  | 321  |
| [GO:0002245] physiological response to wounding                  | 7  | 1.19E-08 | 28  | 349  |
| [GO:0048699] generation of neurons                               | 9  | 2.86E-08 | 25  | 297  |
| [GO:0048514] blood vessel morphogenesis                          | 8  | 2.99E-08 | 18  | 159  |
| [GO:0009605] response to external stimulus                       | 2  | 3.12E-08 | 35  | 533  |
| [GO:0030198] extracellular matrix organization and biogenesis    | 5  | 3.99E-08 | 13  | 81   |
| [GO:0043062] extracellular structure organization and biogenesis | 2  | 3.99E-08 | 13  | 81   |
| [GO:0050794] regulation of cellular process                      | 3  | 4.89E-08 | 135 | 3808 |
| [GO:0016043] cell organization and biogenesis                    | 4  | 5.19E-08 | 89  | 2181 |
| [GO:0048771] tissue remodeling                                   | 3  | 6.30E-08 | 14  | 99   |
| [GO:0050793] regulation of development                           | 3  | 1.19E-07 | 19  | 193  |
| [GO:0045445] myoblast differentiation                            | 12 | 1.20E-07 | 9   | 37   |
| [GO:0006811] ion transport                                       | 7  | 1.20E-07 | 42  | 751  |
| [GO:0007160] cell-matrix adhesion                                | 4  | 1.86E-07 | 12  | 77   |
| [GO:0042692] muscle cell differentiation                         | 4  | 2.12E-07 | 10  | 51   |
| [GO:0046849] bone remodeling                                     | 4  | 2.14E-07 | 13  | 93   |
| [GO:0031589] cell-substrate adhesion                             | 3  | 2.15E-07 | 12  | 78   |

|                                                                                       |    |          |    |      |
|---------------------------------------------------------------------------------------|----|----------|----|------|
| [GO:0030199] collagen fibril organization                                             | 6  | 2.18E-07 | 6  | 13   |
| [GO:0030182] neuron differentiation                                                   | 10 | 2.18E-07 | 22 | 263  |
| [GO:0031175] neurite development                                                      | 18 | 2.38E-07 | 18 | 182  |
| [GO:0007010] cytoskeleton organization and biogenesis                                 | 6  | 2.45E-07 | 33 | 528  |
| [GO:0007015] actin filament organization                                              | 9  | 2.57E-07 | 10 | 52   |
| [GO:0048666] neuron development                                                       | 11 | 2.84E-07 | 19 | 204  |
| [GO:0040007] growth                                                                   | 1  | 2.95E-07 | 20 | 225  |
| [GO:0051243] negative regulation of cellular physiological process                    | 11 | 3.14E-07 | 44 | 835  |
| [GO:0042127] regulation of cell proliferation                                         | 9  | 3.88E-07 | 28 | 412  |
| [GO:0048518] positive regulation of biological process                                | 2  | 4.29E-07 | 52 | 1081 |
| [GO:0007409] axonogenesis                                                             | 23 | 4.38E-07 | 16 | 151  |
| [GO:0001503] ossification                                                             | 11 | 4.94E-07 | 12 | 84   |
| [GO:0007178] transmembrane receptor protein serine/threonine kinase signaling pathway | 6  | 5.64E-07 | 12 | 85   |
| [GO:0031214] biomineral formation                                                     | 4  | 5.64E-07 | 12 | 85   |
| [GO:0016477] cell migration                                                           | 9  | 6.01E-07 | 22 | 279  |
| [GO:0030030] cell projection organization and biogenesis                              | 9  | 7.23E-07 | 20 | 238  |
| [GO:0048812] neurite morphogenesis                                                    | 22 | 8.10E-07 | 16 | 158  |
| [GO:0048858] cell projection morphogenesis                                            | 9  | 8.10E-07 | 16 | 158  |
| [GO:0048667] neuron morphogenesis during differentiation                              | 18 | 8.10E-07 | 16 | 158  |
| [GO:0000904] cellular morphogenesis during differentiation                            | 11 | 8.44E-07 | 17 | 178  |
| [GO:0050817] coagulation                                                              | 2  | 8.58E-07 | 11 | 73   |
| [GO:0050818] regulation of coagulation                                                | 5  | 1.46E-06 | 5  | 10   |
| [GO:0030278] regulation of ossification                                               | 16 | 1.50E-06 | 7  | 26   |
| [GO:0016055] Wnt receptor signaling pathway                                           | 5  | 2.09E-06 | 13 | 113  |
| [GO:0007267] cell-cell signaling                                                      | 3  | 2.14E-06 | 31 | 528  |
| [GO:0007519] striated muscle development                                              | 5  | 2.66E-06 | 12 | 98   |
| [GO:0048741] skeletal muscle fiber development                                        | 8  | 3.08E-06 | 9  | 53   |
| [GO:0048747] muscle fiber development                                                 | 5  | 3.08E-06 | 9  | 53   |
| [GO:0046850] regulation of bone remodeling                                            | 8  | 3.34E-06 | 7  | 29   |
| [GO:0051093] negative regulation of development                                       | 5  | 3.56E-06 | 11 | 84   |
| [GO:0006810] transport                                                                | 6  | 4.34E-06 | 93 | 2558 |

|                                                                               |    |          |     |      |
|-------------------------------------------------------------------------------|----|----------|-----|------|
| [GO:0048637] skeletal muscle development                                      | 6  | 4.95E-06 | 9   | 56   |
| [GO:0045595] regulation of cell differentiation                               | 7  | 4.97E-06 | 14  | 141  |
| [GO:0007596] blood coagulation                                                | 13 | 5.78E-06 | 10  | 72   |
| [GO:0030029] actin filament-based process                                     | 7  | 8.09E-06 | 17  | 210  |
| [GO:0050878] regulation of body fluids                                        | 3  | 9.71E-06 | 11  | 93   |
| [GO:0007599] hemostasis                                                       | 4  | 1.07E-05 | 10  | 77   |
| [GO:0007412] axon target recognition                                          | 25 | 1.22E-05 | 3   | 3    |
| [GO:0045765] regulation of angiogenesis                                       | 10 | 1.28E-05 | 7   | 35   |
| [GO:0030178] negative regulation of Wnt receptor signaling pathway            | 13 | 1.59E-05 | 5   | 15   |
| [GO:0007169] transmembrane receptor protein tyrosine kinase signaling pathway | 6  | 1.59E-05 | 15  | 177  |
| [GO:0021700] developmental maturation                                         | 2  | 1.74E-05 | 9   | 65   |
| [GO:0048469] cell maturation                                                  | 6  | 1.74E-05 | 9   | 65   |
| [GO:0045596] negative regulation of cell differentiation                      | 11 | 2.52E-05 | 9   | 68   |
| [GO:0009966] regulation of signal transduction                                | 6  | 2.66E-05 | 23  | 379  |
| [GO:0006950] response to stress                                               | 2  | 2.68E-05 | 40  | 868  |
| [GO:0016525] negative regulation of angiogenesis                              | 11 | 3.15E-05 | 5   | 17   |
| [GO:0050819] negative regulation of coagulation                               | 8  | 3.21E-05 | 4   | 9    |
| [GO:0001558] regulation of cell growth                                        | 17 | 4.78E-05 | 11  | 110  |
| [GO:0008284] positive regulation of cell proliferation                        | 14 | 5.25E-05 | 15  | 196  |
| [GO:0007229] integrin-mediated signaling pathway                              | 5  | 5.66E-05 | 10  | 93   |
| [GO:0000074] regulation of progression through cell cycle                     | 10 | 7.61E-05 | 25  | 461  |
| [GO:0051726] regulation of cell cycle                                         | 9  | 8.15E-05 | 25  | 463  |
| [GO:0051244] regulation of cellular physiological process                     | 7  | 8.35E-05 | 113 | 3509 |
| [GO:0007411] axon guidance                                                    | 30 | 0.000103 | 9   | 81   |
| [GO:0048146] positive regulation of fibroblast proliferation                  | 17 | 0.000118 | 3   | 5    |
| [GO:0030239] myofibril assembly                                               | 27 | 0.00012  | 4   | 12   |
| [GO:0055001] muscle cell development                                          | 6  | 0.00012  | 4   | 12   |
| [GO:0055002] striated muscle cell development                                 | 12 | 0.00012  | 4   | 12   |
| [GO:0030111] regulation of Wnt receptor signaling pathway                     | 9  | 0.000122 | 5   | 22   |
| [GO:0007154] cell communication                                               | 2  | 0.00013  | 140 | 4597 |
| [GO:0051216] cartilage development                                            | 6  | 0.000134 | 6   | 35   |
| [GO:0006633] fatty acid biosynthesis                                          | 17 | 0.000134 | 8   | 66   |

|                                                                         |    |          |    |     |
|-------------------------------------------------------------------------|----|----------|----|-----|
| [GO:0046851] negative regulation of bone remodeling                     | 12 | 0.000169 | 4  | 13  |
| [GO:0001502] cartilage condensation                                     | 7  | 0.000169 | 4  | 13  |
| [GO:0043009] embryonic development (sensu Vertebrata)                   | 4  | 0.0002   | 10 | 108 |
| [GO:0043119] positive regulation of physiological process               | 5  | 0.000242 | 37 | 865 |
| [GO:0007179] transforming growth factor beta receptor signaling pathway | 7  | 0.000259 | 7  | 55  |
| [GO:0006936] muscle contraction                                         | 3  | 0.000264 | 11 | 133 |
| [GO:0008285] negative regulation of cell proliferation                  | 14 | 0.000274 | 13 | 179 |
| [GO:0030282] bone mineralization                                        | 12 | 0.000282 | 5  | 26  |
| [GO:0009790] embryonic development                                      | 2  | 0.000299 | 21 | 389 |
| [GO:0016053] organic acid biosynthesis                                  | 9  | 0.0003   | 8  | 74  |
| [GO:0046394] carboxylic acid biosynthesis                               | 11 | 0.0003   | 8  | 74  |
| [GO:0001654] eye development                                            | 5  | 0.000322 | 9  | 94  |
| [GO:0035295] tube development                                           | 3  | 0.000341 | 11 | 137 |
| [GO:0045087] innate immune response                                     | 9  | 0.000395 | 8  | 77  |
| [GO:0007567] parturition                                                | 8  | 0.000399 | 3  | 7   |
| [GO:0042552] myelination                                                | 15 | 0.000405 | 5  | 28  |
| [GO:0051241] negative regulation of organismal physiological process    | 8  | 0.000405 | 5  | 28  |
| [GO:0051146] striated muscle cell differentiation                       | 9  | 0.000408 | 4  | 16  |
| [GO:0030500] regulation of bone mineralization                          | 18 | 0.000408 | 4  | 16  |
| [GO:0007610] behavior                                                   | 2  | 0.000418 | 19 | 343 |
| [GO:0030036] actin cytoskeleton organization and biogenesis             | 8  | 0.000463 | 13 | 189 |
| [GO:0009792] embryonic development (sensu Metazoa)                      | 3  | 0.000603 | 12 | 170 |
| [GO:0008544] epidermis development                                      | 5  | 0.000647 | 10 | 125 |
| [GO:0002526] acute inflammatory response                                | 12 | 0.000656 | 8  | 83  |
| [GO:0007272] ensheathment of neurons                                    | 13 | 0.000662 | 5  | 31  |
| [GO:0008366] axon ensheathment                                          | 14 | 0.000662 | 5  | 31  |
| [GO:0051094] positive regulation of development                         | 5  | 0.000664 | 7  | 64  |
| [GO:0019226] transmission of nerve impulse                              | 7  | 0.000668 | 17 | 301 |
| [GO:0048522] positive regulation of cellular process                    | 5  | 0.000766 | 35 | 854 |
| [GO:0007049] cell cycle                                                 | 4  | 0.000771 | 32 | 757 |
| [GO:0051240] positive regulation of organismal physiological process    | 8  | 0.000779 | 9  | 106 |
| [GO:0030324] lung development                                           | 8  | 0.000788 | 6  | 48  |

|                                                         |    |          |    |      |
|---------------------------------------------------------|----|----------|----|------|
| [GO:0048628] myoblast maturation                        | 17 | 0.000823 | 4  | 19   |
| [GO:0009968] negative regulation of signal transduction | 9  | 0.000831 | 8  | 86   |
| [GO:0030323] respiratory tube development               | 7  | 0.000881 | 6  | 49   |
| [GO:0048627] myoblast development                       | 14 | 0.00101  | 4  | 20   |
| [GO:0042476] odontogenesis                              | 6  | 0.001024 | 5  | 34   |
| [GO:0008219] cell death                                 | 5  | 0.001101 | 30 | 709  |
| [GO:0016265] death                                      | 2  | 0.001126 | 30 | 710  |
| [GO:0007398] ectoderm development                       | 4  | 0.001172 | 10 | 135  |
| [GO:0040008] regulation of growth                       | 3  | 0.001186 | 11 | 159  |
| [GO:0006954] inflammatory response                      | 11 | 0.001187 | 15 | 262  |
| [GO:0045661] regulation of myoblast differentiation     | 17 | 0.001298 | 3  | 10   |
| [GO:0030279] negative regulation of ossification        | 21 | 0.001298 | 3  | 10   |
| [GO:0042981] regulation of apoptosis                    | 13 | 0.001443 | 22 | 470  |
| [GO:0001955] blood vessel maturation                    | 6  | 0.001569 | 2  | 3    |
| [GO:0019369] arachidonic acid metabolism                | 12 | 0.001569 | 2  | 3    |
| [GO:0043067] regulation of programmed cell death        | 11 | 0.001692 | 22 | 476  |
| [GO:0048145] regulation of fibroblast proliferation     | 11 | 0.001754 | 3  | 11   |
| [GO:0048144] fibroblast proliferation                   | 5  | 0.001754 | 3  | 11   |
| [GO:0006929] substrate-bound cell migration             | 10 | 0.001754 | 3  | 11   |
| [GO:0050790] regulation of catalytic activity           | 2  | 0.001756 | 17 | 329  |
| [GO:0008015] circulation                                | 3  | 0.001871 | 9  | 120  |
| [GO:0001508] regulation of action potential             | 8  | 0.001929 | 5  | 39   |
| [GO:0006631] fatty acid metabolism                      | 11 | 0.002024 | 11 | 170  |
| [GO:0001747] eye development (sensu Mammalia)           | 7  | 0.002143 | 6  | 58   |
| [GO:0050767] regulation of neurogenesis                 | 12 | 0.002163 | 5  | 40   |
| [GO:0042088] T-helper 1 type immune response            | 9  | 0.002299 | 3  | 12   |
| [GO:0048820] hair follicle maturation                   | 11 | 0.002299 | 3  | 12   |
| [GO:0006636] fatty acid desaturation                    | 12 | 0.002299 | 3  | 12   |
| [GO:0048015] phosphoinositide-mediated signaling        | 6  | 0.002307 | 7  | 79   |
| [GO:0007422] peripheral nervous system development      | 5  | 0.002408 | 4  | 25   |
| [GO:0048592] eye morphogenesis                          | 8  | 0.002418 | 5  | 41   |
| [GO:0050874] organismal physiological process           | 2  | 0.00242  | 97 | 3204 |

|                                                                               |    |          |    |      |
|-------------------------------------------------------------------------------|----|----------|----|------|
| [GO:0043010] eye development (sensu Vertebrata)                               | 6  | 0.002551 | 6  | 60   |
| [GO:0006508] proteolysis                                                      | 11 | 0.002553 | 32 | 816  |
| [GO:0048562] embryonic organ morphogenesis                                    | 9  | 0.002795 | 4  | 26   |
| [GO:0030335] positive regulation of cell migration                            | 23 | 0.002937 | 3  | 13   |
| [GO:0006693] prostaglandin metabolism                                         | 14 | 0.002937 | 3  | 13   |
| [GO:0006692] prostanoid metabolism                                            | 13 | 0.002937 | 3  | 13   |
| [GO:0007242] intracellular signaling cascade                                  | 4  | 0.003019 | 44 | 1240 |
| [GO:0043350] neuroblast proliferation (sensu Vertebrata)                      | 14 | 0.003091 | 2  | 4    |
| [GO:0006930] substrate-bound cell migration, cell extension                   | 11 | 0.003091 | 2  | 4    |
| [GO:0021675] nerve development                                                | 3  | 0.003091 | 2  | 4    |
| [GO:0045662] negative regulation of myoblast differentiation                  | 22 | 0.003091 | 2  | 4    |
| [GO:0048661] positive regulation of smooth muscle cell proliferation          | 17 | 0.003091 | 2  | 4    |
| [GO:0042759] long-chain fatty acid biosynthesis                               | 19 | 0.003091 | 2  | 4    |
| [GO:0050832] defense response to fungus                                       | 9  | 0.003091 | 2  | 4    |
| [GO:0006956] complement activation                                            | 39 | 0.003312 | 5  | 44   |
| [GO:0002541] activation of plasma proteins during acute inflammatory response | 23 | 0.003312 | 5  | 44   |
| [GO:0050778] positive regulation of immune response                           | 16 | 0.003492 | 7  | 85   |
| [GO:0002684] positive regulation of immune system process                     | 11 | 0.003492 | 7  | 85   |
| [GO:0051270] regulation of cell motility                                      | 14 | 0.003537 | 6  | 64   |
| [GO:0007423] sensory organ development                                        | 4  | 0.003567 | 10 | 157  |
| [GO:0009620] response to fungus                                               | 4  | 0.003675 | 3  | 14   |
| [GO:0001756] somitogenesis                                                    | 8  | 0.003692 | 4  | 28   |
| [GO:0006958] complement activation, classical pathway                         | 47 | 0.003692 | 4  | 28   |
| [GO:0006915] apoptosis                                                        | 7  | 0.003758 | 27 | 670  |
| [GO:0043066] negative regulation of apoptosis                                 | 19 | 0.003885 | 11 | 185  |
| [GO:0006916] anti-apoptosis                                                   | 20 | 0.003942 | 9  | 134  |
| [GO:0016337] cell-cell adhesion                                               | 3  | 0.003959 | 13 | 240  |
| [GO:0002460] adaptive immune response (sensu Gnathostomata)                   | 8  | 0.003976 | 7  | 87   |
| [GO:0002250] adaptive immune response                                         | 7  | 0.003976 | 7  | 87   |
| [GO:0002455] humoral immune response mediated by circulating immunoglobulin   | 15 | 0.004205 | 4  | 29   |
| [GO:0001657] ureteric bud development                                         | 8  | 0.004205 | 4  | 29   |
| [GO:0043085] positive regulation of enzyme activity                           | 4  | 0.004385 | 11 | 188  |

|                                                                               |    |          |     |      |
|-------------------------------------------------------------------------------|----|----------|-----|------|
| [GO:0043069] negative regulation of programmed cell death                     | 16 | 0.004385 | 11  | 188  |
| [GO:0040012] regulation of locomotion                                         | 5  | 0.004444 | 6   | 67   |
| [GO:0048595] eye morphogenesis (sensu Mammalia)                               | 17 | 0.004516 | 3   | 15   |
| [GO:0008543] fibroblast growth factor receptor signaling pathway              | 7  | 0.004516 | 3   | 15   |
| [GO:0009612] response to mechanical stimulus                                  | 4  | 0.004516 | 3   | 15   |
| [GO:0012501] programmed cell death                                            | 6  | 0.004663 | 27  | 681  |
| [GO:0042475] odontogenesis (sensu Vertebrata)                                 | 7  | 0.004765 | 4   | 30   |
| [GO:0010002] cardioblast differentiation                                      | 10 | 0.005072 | 2   | 5    |
| [GO:0030501] positive regulation of bone mineralization                       | 24 | 0.005072 | 2   | 5    |
| [GO:0048157] oogenesis (sensu Mammalia)                                       | 6  | 0.005072 | 2   | 5    |
| [GO:0048008] platelet-derived growth factor receptor signaling pathway        | 7  | 0.005072 | 2   | 5    |
| [GO:0021537] telencephalon development                                        | 9  | 0.005072 | 2   | 5    |
| [GO:0042730] fibrinolysis                                                     | 22 | 0.005072 | 2   | 5    |
| [GO:0051090] regulation of transcription factor activity                      | 17 | 0.005373 | 4   | 31   |
| [GO:0006690] icosanoid metabolism                                             | 12 | 0.005373 | 4   | 31   |
| [GO:0048593] eye morphogenesis (sensu Vertebrata)                             | 10 | 0.005463 | 3   | 16   |
| [GO:0016202] regulation of striated muscle development                        | 6  | 0.005463 | 3   | 16   |
| [GO:0007281] germ cell development                                            | 8  | 0.006031 | 4   | 32   |
| [GO:0035239] tube morphogenesis                                               | 5  | 0.006075 | 7   | 94   |
| [GO:0001822] kidney development                                               | 6  | 0.006282 | 5   | 51   |
| [GO:0050769] positive regulation of neurogenesis                              | 15 | 0.006522 | 3   | 17   |
| [GO:0040017] positive regulation of locomotion                                | 8  | 0.006522 | 3   | 17   |
| [GO:0007405] neuroblast proliferation                                         | 13 | 0.006522 | 3   | 17   |
| [GO:0051272] positive regulation of cell motility                             | 20 | 0.006522 | 3   | 17   |
| [GO:0009408] response to heat                                                 | 5  | 0.00674  | 4   | 33   |
| [GO:0007165] signal transduction                                              | 3  | 0.006898 | 122 | 4319 |
| [GO:0007498] mesoderm development                                             | 4  | 0.007393 | 5   | 53   |
| [GO:0007638] mechanosensory behavior                                          | 6  | 0.007493 | 2   | 6    |
| [GO:0030193] regulation of blood coagulation                                  | 17 | 0.007493 | 2   | 6    |
| [GO:0048660] regulation of smooth muscle cell proliferation                   | 11 | 0.007493 | 2   | 6    |
| [GO:0045410] positive regulation of interleukin-6 biosynthesis                | 44 | 0.007493 | 2   | 6    |
| [GO:0051057] positive regulation of small GTPase mediated signal transduction | 10 | 0.007493 | 2   | 6    |



|                                                                    |    |          |    |     |
|--------------------------------------------------------------------|----|----------|----|-----|
| [GO:0030195] negative regulation of blood coagulation              | 21 | 0.007493 | 2  | 6   |
| [GO:0051242] positive regulation of cellular physiological process | 11 | 0.007529 | 29 | 775 |
| [GO:0001701] embryonic development (sensu Mammalia)                | 5  | 0.007691 | 6  | 75  |
| [GO:0048048] embryonic eye morphogenesis                           | 13 | 0.007694 | 3  | 18  |
| [GO:0006809] nitric oxide biosynthesis                             | 6  | 0.007694 | 3  | 18  |
| [GO:0046209] nitric oxide metabolism                               | 4  | 0.007694 | 3  | 18  |
| [GO:0007268] synaptic transmission                                 | 8  | 0.007869 | 13 | 261 |
| [GO:0007017] microtubule-based process                             | 7  | 0.008256 | 11 | 205 |
| [GO:0007162] negative regulation of cell adhesion                  | 8  | 0.008982 | 3  | 19  |
| [GO:0045859] regulation of protein kinase activity                 | 5  | 0.009149 | 10 | 180 |
| [GO:0007626] locomotory behavior                                   | 3  | 0.009153 | 11 | 208 |
| [GO:0048568] embryonic organ development                           | 5  | 0.009191 | 4  | 36  |
| [GO:0006937] regulation of muscle contraction                      | 7  | 0.009191 | 4  | 36  |
| [GO:0030334] regulation of cell migration                          | 16 | 0.009305 | 5  | 56  |
