# Supplementary material
Source: PubMed Central journal article supplement (PMC2972971)
Supplement: 1013555107_st08.pdf [file 1013555107_st08.pdf]

**Supplemental table S8.** List of the 1649 common factors (listed as Gene names) between microarray and proteomic datasets with relative fold change of expression.

| <b>GeneName</b> | <b>Microarray</b> | <b>Proteome</b> |
|-----------------|-------------------|-----------------|
| Agl             | -0.448816067      | 4               |
| Arl8a           | 0.7722461         | -2.32           |
| Clasp1          | -0.557229675      | 2.81            |
| Bche            | -0.5214601        | 3               |
| Krt10           | 0.4357406         | -3.58           |
| Bre             | 0.390497987       | -3              |
| Nrp1            | -0.71741665       | 1.58            |
| Vtn             | -1.1685805        | 0.95            |
| Anxa3           | 1.101109          | -1              |
| Bag2            | 0.6261683         | -1.58           |
| Rps27           | 0.2648668         | -3.58           |
| Osbp1a          | -0.28437535       | 3.32            |
| Acad11          | -0.56517045       | 1.58            |
| Pnpo            | -0.297341         | 3               |
| Ryr2            | -0.9635955        | 0.9             |
| Caprin1         | 0.21955993        | -3.81           |
| F2              | -0.2323809        | 3.58            |
| Lrrc20          | -0.2770036        | 3               |
| Nedd8           | 0.1884171         | -4.39           |
| Vldlr           | -0.389564517      | 2               |
| Csda            | -0.1928401        | 4               |
| Prkag1          | -0.3625474        | 2               |
| Dnajc8          | 0.35084235        | -2              |
| Cds2            | -0.193069538      | 3.58            |
| Gmfb            | 0.557385132       | -1.22           |
| Pfdn2           | 0.2244968         | -3              |
| Akt1            | -0.284957875      | 2.32            |
| Tenc1           | -0.1700691        | 3.81            |
| Chmp4b          | 0.24231035        | -2.58           |
| Gnal            | -0.155378377      | 4               |
| Lama4           | 0.20436105        | -3              |
| Cbr2            | 0.4765135         | -1.25           |
| Akr1b8          | 1.081397          | -0.53           |
| Galt            | -0.3568996        | 1.58            |
| Rab3ip          | -0.1842791        | 3               |
| Ppp3ca          | -0.13666077       | 4               |
| Slc9a6          | 0.18085503        | -3              |
| S100a8          | 0.7278976         | -0.74           |
| Arf4            | 0.53467315        | -1              |
| Dnaja4          | 0.415680567       | -1.25           |
| Vps37c          | 0.4960564         | -1              |
| Pafah1b2        | 0.404256125       | -1.22           |
| Mat1a           | -0.2465216        | 2               |
| Hnrnp2          | 0.1271302         | -3.81           |

|         |              |       |
|---------|--------------|-------|
| Vps25   | 0.105577533  | -4.58 |
| Ctnna1  | -0.280244573 | 1.72  |
| Lcmt1   | 0.2941392    | -1.58 |
| Flad1   | -0.2929705   | 1.58  |
| Nudt7   | -0.164551614 | 2.81  |
| Igf2r   | -0.254527367 | 1.81  |
| Msrb2   | -0.5597858   | 0.81  |
| Ybx1    | -0.262468    | 1.72  |
| Atp1b3  | 0.4450588    | -1    |
| Psmb4   | 0.2076006    | -2.13 |
| Gpc1    | -0.6988246   | 0.63  |
| Fkbp1a  | 0.267558254  | -1.62 |
| Ubxn1   | 0.4012283    | -1.08 |
| Myeov2  | 0.430663767  | -1    |
| Syne2   | -0.143534175 | 3     |
| Dpy30   | 0.2212426    | -1.89 |
| Psmd14  | 0.7104089    | -0.58 |
| Phb     | -0.43978895  | 0.93  |
| Ttr     | 0.566547     | -0.72 |
| Eno2    | 0.9538434    | -0.42 |
| C4b     | 0.8418252    | -0.47 |
| Pex14   | 0.1972532    | -2    |
| Hs1bp3  | -0.14007685  | 2.81  |
| Dbnl    | 0.4248473    | -0.91 |
| Nt5c    | 0.7808635    | -0.49 |
| Ywhaq   | 0.75893272   | -0.49 |
| Reep5   | -0.276471867 | 1.32  |
| Camk2a  | -0.61033472  | 0.58  |
| Gstm7   | -0.3000685   | 1.17  |
| Arpc2   | 0.13474225   | -2.58 |
| Flnb    | -0.19778224  | 1.74  |
| Afm     | -0.2166364   | 1.58  |
| Timm50  | -0.24096085  | 1.42  |
| Rpn2    | 0.4188404    | -0.81 |
| Actn4   | 0.9666586    | -0.35 |
| Gmpr    | -0.2106113   | 1.58  |
| Rab11a  | 0.19764804   | -1.68 |
| Scoc    | 0.38064955   | -0.87 |
| Sec24c  | -0.20804545  | 1.58  |
| Cdc3711 | -0.207797625 | 1.58  |
| Gpd1l   | -0.3948601   | 0.81  |
| Ddt     | -0.4679152   | 0.68  |
| Car1    | -0.1491793   | 2.12  |
| Vbp1    | 0.2702144    | -1.17 |
| A2m     | 1.122543     | -0.28 |
| Lrg1    | -0.7472633   | 0.42  |
| Uba3    | 0.1983775    | -1.58 |
| Hebp1   | 0.2288621    | -1.36 |

|          |              |       |
|----------|--------------|-------|
| Actn2    | 0.2163334    | -1.43 |
| Tor1aip1 | -0.1095384   | 2.81  |
| Cmya5    | -0.2051976   | 1.5   |
| Pak2     | 0.3025368    | -1    |
| Sephs1   | 0.1229819    | -2.46 |
| Adh1     | 0.1777989    | -1.7  |
| Serpinf2 | -0.1042277   | 2.81  |
| Pex19    | -0.158781807 | 1.81  |
| Pecam1   | -0.2273909   | 1.26  |
| Ttn      | -0.23417925  | 1.22  |
| Unc45b   | -0.6046845   | 0.46  |
| Tceb2    | 0.1894935    | -1.42 |
| Sacm1l   | -0.0751609   | 3.58  |
| Tbcb     | 0.3927616    | -0.68 |
| Eef1a1   | 0.5474809    | -0.48 |
| Arhgdib  | 0.5762777    | -0.45 |
| Ifi35    | 0.129425193  | -2    |
| Prkaa2   | -0.52395535  | 0.49  |
| Gys1     | -0.66591055  | 0.38  |
| Slc25a42 | -0.42989525  | 0.58  |
| Myh11    | -0.30185957  | 0.82  |
| Ube2m    | -0.1234585   | 2     |
| Kcmf1    | -0.12850114  | 1.91  |
| Txn1     | 0.233732692  | -1.04 |
| Sfrs1    | -0.2419055   | 1     |
| Tsnax    | -0.4131637   | 0.58  |
| Hyou1    | -0.14080488  | 1.68  |
| G6pdx    | 0.3180552    | -0.74 |
| Psmb1    | 0.214668279  | -1.09 |
| Mat2a    | -0.077353046 | 3     |
| Cndp2    | 0.197306325  | -1.16 |
| Eif3i    | 0.1725427    | -1.32 |
| Dysf     | -0.1304086   | 1.73  |
| Cd47     | 0.169586468  | -1.32 |
| Rock2    | 0.5288542    | -0.42 |
| Thbd     | -0.07400767  | 3     |
| Ostf1    | 0.14012695   | -1.58 |
| Cacna2d1 | -0.12859898  | 1.72  |
| Atp2a2   | -0.458886063 | 0.48  |
| Lifr     | -0.377281533 | 0.58  |
| Ptpn11   | 0.230483278  | -0.94 |
| Lbh      | 0.143025279  | -1.49 |
| Kif13a   | 0.068805814  | -3    |
| Rps14    | 0.2776867    | -0.74 |
| Pabpc1   | 0.25887115   | -0.79 |
| Nol3     | 0.5518357    | -0.37 |
| Lnp      | -0.095179073 | 2.12  |
| Speg     | -0.149361093 | 1.35  |

|          |              |       |
|----------|--------------|-------|
| Chchd3   | -0.49013968  | 0.4   |
| Afg3l2   | -0.274292033 | 0.71  |
| Fxr1     | 0.146576605  | -1.32 |
| Snta1    | 0.1924216    | -1    |
| Eno1     | 0.3202766    | -0.6  |
| Nono     | 0.102033135  | -1.87 |
| Rpl3     | -0.07365767  | 2.58  |
| Suox     | 0.2725576    | -0.69 |
| Dido1    | -0.118576207 | 1.58  |
| Tns1     | -0.12417104  | 1.46  |
| Bzw2     | -0.22316655  | 0.81  |
| Wnk1     | -0.047253293 | 3.81  |
| Atp5j    | -0.1587817   | 1.12  |
| Myh4     | -0.1567339   | 1.12  |
| Tuba4a   | -0.487421767 | 0.36  |
| Ryr3     | 0.175067345  | -1    |
| Sccpdh   | -0.1552695   | 1.12  |
| Htra2    | 0.12549098   | -1.37 |
| Kif5a    | -0.17164375  | 1     |
| Sh3glb2  | -0.2634128   | 0.65  |
| Slk      | 0.195933822  | -0.87 |
| Mybbp1a  | 0.10770096   | -1.58 |
| Wdr90    | 0.07286787   | -2.32 |
| Adsl     | -0.2216323   | 0.76  |
| Ccdc66   | 0.075812027  | -2.22 |
| Rpl18a   | 0.2266223    | -0.74 |
| Slc25a46 | -0.105604965 | 1.58  |
| Mcts1    | 0.1667515    | -1    |
| Nans     | 0.2822839    | -0.58 |
| Rpl18    | 0.33040555   | -0.49 |
| Cct5     | 0.2985109    | -0.54 |
| Arpc1a   | 0.3272963    | -0.49 |
| Myoz2    | 0.1973941    | -0.81 |
| Slc25a20 | -0.6146377   | 0.26  |
| Bcl2l13  | -0.124740439 | 1.25  |
| Nap1l4   | -0.1120996   | 1.39  |
| Lcp1     | 0.426691     | -0.36 |
| Chchd4   | 0.1531623    | -1    |
| Mapre1   | 0.30828924   | -0.49 |
| Tpm3     | 0.35232226   | -0.42 |
| Tubb2c   | -0.3951317   | 0.37  |
| Serhl    | -0.197341673 | 0.74  |
| Cox5b    | -0.178505518 | 0.81  |
| Atp2a1   | -0.2482529   | 0.58  |
| Farsb    | -0.142862903 | 1     |
| Rnf114   | -0.214875486 | 0.66  |
| Eif2s2   | 0.191431581  | -0.74 |
| Pter     | 0.069689985  | -2    |

|         |              |       |
|---------|--------------|-------|
| Mylk3   | 0.06259569   | -2.21 |
| Atp12a  | -0.1864948   | 0.74  |
| Fbl     | 0.2369439    | -0.58 |
| Nme3    | 0.3263111    | -0.42 |
| Impdh2  | 0.11705395   | -1.17 |
| Hspb8   | 0.295246767  | -0.46 |
| Pdha2   | -0.2155647   | 0.63  |
| Gclm    | 0.4215396    | -0.32 |
| Psmc6   | 0.463467     | -0.29 |
| Ppp1ca  | -0.0863924   | 1.55  |
| Psm5    | 0.1332391    | -1    |
| Prkar2a | -0.210793325 | 0.63  |
| Snrpd1  | 0.3140763    | -0.42 |
| Hnrnpa1 | 0.099153156  | -1.32 |
| Adck1   | -0.08230241  | 1.58  |
| Prph    | -0.2200257   | 0.58  |
| Acox1   | -0.1648182   | 0.77  |
| Eif4a2  | 0.1265386    | -1    |
| Hnrnpf  | 0.162076225  | -0.78 |
| Myom1   | 0.1414935    | -0.89 |
| Fadd    | 0.10971545   | -1.14 |
| Atp1b1  | 0.244877715  | -0.51 |
| Coq5    | -0.38927605  | 0.32  |
| Fermt2  | -0.071938307 | 1.7   |
| Eftud1  | 0.07643193   | -1.58 |
| Cpne1   | 0.07514604   | -1.58 |
| Hmox2   | -0.2811785   | 0.42  |
| Pa2g4   | 0.1430648    | -0.81 |
| Gng5    | -0.11448747  | 1     |
| Acad8   | -0.086401955 | 1.32  |
| Coro1b  | 0.1113892    | -1    |
| Spnb1   | -0.2123723   | 0.51  |
| Ddx1    | 0.099502092  | -1.08 |
| Cox4i1  | -0.2132495   | 0.5   |
| Snx3    | 0.1832132    | -0.58 |
| Map2k1  | 0.3320713    | -0.32 |
| Ctsc    | 0.122671835  | -0.85 |
| Ank1    | -0.10709583  | 0.97  |
| Aak1    | 0.051581297  | -2    |
| Bsg     | -0.481122    | 0.21  |
| Abhd11  | -0.314724    | 0.32  |
| Ogt     | -0.100608822 | 1     |
| Dnajc11 | -0.055441818 | 1.81  |
| Acta2   | 1.247296067  | -0.08 |
| Cox6a2  | -0.27606125  | 0.36  |
| Tatdn1  | 0.274868047  | -0.36 |
| Sdsl    | 0.02750858   | -3.58 |
| Rps15   | 0.2053862    | -0.47 |

|               |              |       |
|---------------|--------------|-------|
| Pcyt2         | -0.1644303   | 0.58  |
| Napa          | -0.111442865 | 0.85  |
| Dnaja2        | 0.211030738  | -0.44 |
| Hbb-b1        | 0.1393782    | -0.66 |
| Man2b1        | 0.030632485  | -3    |
| Atp5d         | -0.3637287   | 0.25  |
| Rplp0         | 0.08294233   | -1.08 |
| Ccdc69        | -0.056162143 | 1.58  |
| Cmpk1         | 0.2271312    | -0.39 |
| Ktn1          | -0.088566027 | 1     |
| Glrx          | -0.2901829   | 0.3   |
| Smpx          | 0.1335351    | -0.65 |
| Bphl          | -0.073954767 | 1.14  |
| Igfbp1        | -0.036321084 | 2.32  |
| Cd36          | -0.6005197   | 0.14  |
| Palmd         | 0.05303669   | -1.58 |
| Nit1          | 0.052546645  | -1.58 |
| Ubqln2        | -0.070884503 | 1.17  |
| Por           | -0.03065332  | 2.7   |
| Gapdhs        | -0.3304237   | 0.25  |
| Abcf3         | -0.067477367 | 1.22  |
| Idh2          | -0.2831494   | 0.29  |
| Pcmt1         | 0.234094     | -0.35 |
| Eif3f         | -0.06701406  | 1.22  |
| Ilf3          | -0.027051973 | 3     |
| Ahsg          | 0.5767204    | -0.14 |
| Hint2         | -0.2874524   | 0.28  |
| Tuba8         | -0.138681725 | 0.58  |
| Ugcgl1        | -0.1085645   | 0.74  |
| Metap2        | 0.079696236  | -1    |
| Cct6a         | 0.13653439   | -0.58 |
| Ddx3x         | 0.135974     | -0.58 |
| Calml3        | -0.0230724   | 3.32  |
| Ncl           | 0.401985025  | -0.19 |
| 2310005E10Rik | -0.5430571   | 0.14  |
| Eif4a1        | 0.421992433  | -0.18 |
| Hsd17b4       | -0.19407445  | 0.39  |
| Anxa6         | -0.13028217  | 0.58  |
| Elavl1        | 0.061653905  | -1.22 |
| Cops8         | 0.221096     | -0.34 |
| Add1          | 0.074159717  | -1    |
| Ppt1          | -0.078256149 | 0.92  |
| Pdhx          | -0.1424262   | 0.5   |
| Mybpc3        | 0.1611443    | -0.44 |
| Mtap4         | 0.152619275  | -0.46 |
| H2afv         | 0.120906995  | -0.58 |
| Lama2         | 0.3690338    | -0.19 |
| Hpx           | -0.1447571   | 0.48  |

|           |              |       |
|-----------|--------------|-------|
| Orm1      | -0.05928119  | 1.17  |
| M6pr      | 0.2167141    | -0.32 |
| Ephx2     | -0.2613392   | 0.26  |
| Serpina3m | 0.1158778    | -0.58 |
| Grb2      | -0.131492445 | 0.51  |
| Snrpd2    | 0.2042939    | -0.32 |
| Ndufa11   | 0.125450375  | -0.51 |
| Myh14     | -0.01924833  | 3.32  |
| Psmc13    | 0.177258375  | -0.35 |
| Ptges2    | -0.3440574   | 0.18  |
| Crmp1     | -0.106132    | 0.58  |
| Plaa      | 0.191687968  | -0.32 |
| Uros      | -0.08220492  | 0.74  |
| Kng1      | -0.08069977  | 0.75  |
| Atp5h     | -0.21575785  | 0.28  |
| Eif5b     | 0.10346249   | -0.58 |
| Hspa5     | -0.07975124  | 0.74  |
| Hdhd2     | 0.161860267  | -0.36 |
| Coq3      | -0.34085415  | 0.17  |
| Sars      | 0.1919619    | -0.3  |
| Tgm2      | 1.1422591    | -0.05 |
| Tm9sf2    | -0.050846013 | 1.12  |
| Krt1      | -0.03565407  | 1.58  |
| Atad1     | -0.216652163 | 0.26  |
| Jup       | -0.09593233  | 0.58  |
| Camk1     | -0.094350165 | 0.58  |
| Cacybp    | 0.1090072    | -0.5  |
| Oxsr1     | 0.1294912    | -0.42 |
| Psmc3     | -0.05397415  | 1     |
| Psmc6     | 0.06544431   | -0.82 |
| Dctn2     | 0.2331044    | -0.23 |
| Atp5o     | -0.4096546   | 0.13  |
| Ndufv2    | -0.3800068   | 0.14  |
| Ganab     | -0.0364981   | 1.42  |
| Usp14     | 0.06360733   | -0.81 |
| Rab1b     | -0.1837196   | 0.28  |
| Cct3      | 0.113831849  | -0.45 |
| Muc20     | -0.087793825 | 0.58  |
| Krt8      | 0.022390787  | -2.22 |
| Hnrnpab   | 0.205810567  | -0.24 |
| Acyp1     | 0.188079847  | -0.26 |
| Fabp5     | 0.1146463    | -0.42 |
| Psmc3     | 0.15040445   | -0.32 |
| Txnrd1    | 0.086242298  | -0.55 |
| Slc12a7   | -0.18107955  | 0.26  |
| Paics     | 0.093156367  | -0.5  |
| Kpnb1     | 0.153784748  | -0.3  |
| Psmc7     | 0.0980731    | -0.47 |

|           |              |       |
|-----------|--------------|-------|
| Trim54    | -0.1767371   | 0.26  |
| Trap1     | -0.09374697  | 0.49  |
| Psmf1     | 0.107969165  | -0.42 |
| Mapk8ip3  | 0.059816987  | -0.74 |
| Pgcp      | 0.0264654    | -1.66 |
| D10Wsu52e | 0.103715197  | -0.42 |
| Glg1      | -0.12837163  | 0.33  |
| Lamc1     | 0.2214171    | -0.19 |
| Map2k4    | -0.072433795 | 0.58  |
| Limch1    | 0.342619025  | -0.12 |
| Cpn2      | 0.0309453    | -1.32 |
| Eif2s1    | 0.095081576  | -0.42 |
| Psmc5     | 0.2331899    | -0.17 |
| Pcp411    | 0.0557642    | -0.71 |
| Adh5      | -0.1949252   | 0.2   |
| Sar1b     | -0.09250037  | 0.42  |
| Tpm1      | 0.160956623  | -0.24 |
| Park7     | 0.42681555   | -0.09 |
| Dlat      | -0.5465707   | 0.07  |
| Plcd1     | 0.065785705  | -0.58 |
| Ilvbl     | -0.02875972  | 1.32  |
| Nub1      | 0.065111744  | -0.58 |
| Fgb       | -0.1983144   | 0.19  |
| Ociad1    | -0.129601781 | 0.29  |
| Actr2     | 0.186318058  | -0.2  |
| Bpgm      | 0.2459627    | -0.15 |
| Psmb2     | 0.03662014   | -1    |
| Rpl21     | 0.2147663    | -0.17 |
| Hook3     | 0.062551346  | -0.58 |
| Prps1     | 0.02720579   | -1.32 |
| Rnf7      | 0.02213383   | -1.58 |
| Oxsm      | -0.109017532 | 0.32  |
| Itih1     | -0.1153162   | 0.3   |
| Ppia      | 0.4882768    | -0.07 |
| Cops6     | -0.0170843   | 2     |
| Naca      | 0.139110385  | -0.24 |
| Ighg      | -0.2081095   | 0.16  |
| Upf1      | 0.1276382    | -0.26 |
| Ndufb4    | -0.1427779   | 0.23  |
| Edc4      | -0.07768472  | 0.42  |
| Scye1     | 0.07725652   | -0.42 |
| Tsc22d4   | 0.0323747    | -1    |
| Dlst      | -0.3955764   | 0.08  |
| Hnrnpk    | 0.095206748  | -0.33 |
| Stip1     | -0.1636944   | 0.19  |
| Eml2      | -0.02151744  | 1.44  |
| Chordc1   | 0.09645239   | -0.32 |
| Lonp1     | -0.03904088  | 0.79  |



|         |              |       |
|---------|--------------|-------|
| Pfkl    | -0.19272322  | 0.16  |
| Plec1   | -0.045062067 | 0.68  |
| Myh1    | -0.0536783   | 0.57  |
| Ank2    | -0.2315525   | 0.13  |
| Ctsa    | 0.19344161   | -0.15 |
| Ywhag   | -0.115208863 | 0.25  |
| Slc16a1 | 0.02441719   | -1.14 |
| Rbbp7   | 0.013701119  | -2    |
| Nme2    | -0.059412    | 0.46  |
| Dhdh    | 0.1035992    | -0.26 |
| Letm1   | -0.119217355 | 0.22  |
| Pin1    | 0.05557537   | -0.47 |
| Hspa4l  | -0.080553543 | 0.32  |
| Csde1   | 0.010863783  | -2.32 |
| Chchd2  | -0.05040423  | 0.49  |
| Alb     | -0.06521114  | 0.37  |
| Hspe1   | 0.043085125  | -0.56 |
| Hint1   | 0.14136565   | -0.17 |
| Isyna1  | -0.07833672  | 0.29  |
| Serbp1  | -0.05062812  | 0.44  |
| Acss2   | 0.01682035   | -1.32 |
| Cand2   | -0.31629055  | 0.07  |
| Ndufb5  | -0.219003    | 0.1   |
| Hba-a1  | 0.155410442  | -0.14 |
| Srp68   | -0.0108722   | 2     |
| Pspc1   | 0.0215885    | -1    |
| Vars    | -0.01755873  | 1.22  |
| Rab21   | -0.0175136   | 1.22  |
| Pygl    | 0.1635469    | -0.13 |
| Immt    | -0.352800467 | 0.06  |
| Tmpo    | -0.024157586 | 0.85  |
| Man2b2  | -0.01515436  | 1.32  |
| Myh6    | -0.664552567 | 0.03  |
| Psmc1   | 0.3910923    | -0.05 |
| Ndufb8  | -0.2120585   | 0.09  |
| Dak     | -0.04137309  | 0.46  |
| Hnrnpa3 | 0.3168403    | -0.06 |
| Phgdh   | -0.005709013 | 3.32  |
| Uqcrb   | -0.2698612   | 0.07  |
| Btf3    | 0.085645445  | -0.21 |
| Psmc11  | 0.135743966  | -0.13 |
| Eif4h   | -0.037388996 | 0.46  |
| Cox17   | -0.040688675 | 0.42  |
| Ubap2l  | 0.034622682  | -0.49 |
| Finc    | 0.56294265   | -0.03 |
| Galns   | -0.03697975  | 0.42  |
| Mapre2  | -0.061951214 | 0.25  |
| Rap1a   | 0.11354273   | -0.13 |

|          |              |       |
|----------|--------------|-------|
| Ptgr2    | -0.29300975  | 0.05  |
| Ugp2     | -0.061829756 | 0.23  |
| Abhd14b  | 0.05254555   | -0.26 |
| Uqcrls1  | -0.1944783   | 0.07  |
| Rps24    | -0.03233975  | 0.42  |
| Rpl30    | -0.088712055 | 0.15  |
| Cfb      | -0.1138209   | 0.11  |
| Rpl9     | 0.01452001   | -0.85 |
| Ppp2r2a  | 0.034097567  | -0.36 |
| Ppa1     | 0.2045507    | -0.06 |
| Csnk2a1  | 0.026106418  | -0.46 |
| Cct2     | 0.14825377   | -0.08 |
| Pepd     | -0.02755133  | 0.42  |
| Pgam1    | 0.5716823    | -0.02 |
| Tardbp   | 0.011092032  | -1    |
| Psma2    | 0.3654499    | -0.03 |
| Eif5a    | 0.019064267  | -0.56 |
| Ak1      | -0.26627645  | 0.04  |
| Prcp     | -0.01758949  | 0.58  |
| Pebp1    | 0.127012715  | -0.08 |
| Smpdl3a  | -0.008051872 | 1.26  |
| Tomm20   | -0.00492647  | 2     |
| Hspg2    | -0.03239141  | 0.29  |
| Hspb7    | 0.176126467  | -0.05 |
| Serpinc1 | 0.02284892   | -0.37 |
| Hgs      | 0.01451906   | -0.58 |
| Hnrnrm   | 0.03827477   | -0.22 |
| Herc4    | 0.00521543   | -1.58 |
| Fgg      | 0.01799536   | -0.45 |
| Dlg1     | -0.004451633 | 1.81  |
| Denr     | 0.00794729   | -1    |
| Cox6b1   | -0.13142075  | 0.06  |
| Ubqln4   | -0.070990553 | 0.11  |
| Ppp2r4   | 0.045386093  | -0.17 |
| Myl3     | -0.12696322  | 0.06  |
| Hnrnph1  | -0.05301032  | 0.13  |
| Eef2     | -0.03947894  | 0.17  |
| Sec16a   | 0.005445635  | -1.22 |
| Cops3    | -0.004030167 | 1.58  |
| Trim72   | -0.1943051   | 0.03  |
| Atp1a1   | -0.066663293 | 0.08  |
| Mtap     | 0.051182596  | -0.1  |
| Rps2     | -0.04393705  | 0.11  |
| Tnnc1    | 0.02668349   | -0.18 |
| Gbe1     | 0.01000563   | -0.42 |
| Pgm1     | -0.13611225  | 0.03  |
| Tpp2     | -0.017024164 | 0.22  |
| Prdx1    | -0.013090695 | 0.26  |

|          |              |       |
|----------|--------------|-------|
| Apoc3    | -0.02417596  | 0.14  |
| Cdh13    | 0.00707555   | -0.42 |
| Prosc    | -0.04244153  | 0.07  |
| Es1      | -0.07498089  | 0.03  |
| Tomm22   | -0.01311207  | 0.17  |
| Gpd1     | -0.005206865 | 0.42  |
| Hist1h4a | -0.006945204 | 0.3   |
| Rpsa     | -0.009119193 | 0.21  |
| Prdx2    | -0.09261046  | 0.02  |
| Cct4     | 0.00932679   | -0.19 |
| Dctn1    | 0.013237155  | -0.13 |
| Atp5l    | -0.01222865  | 0.09  |
| Gapdh    | -0.052918753 | 0.02  |
| Pard3    | -6.34E-04    | 1.58  |
| Tpp1     | 0.027578755  | -0.03 |
| Apobec2  | 0.00338185   | -0.22 |
| Mtx2     | 0.002621333  | -0.25 |
| Psmc8    | -0.01181825  | 0.05  |
| Acp1     | 3.03E-04     | -0.65 |
| Arpc5l   | 2.95E-04     | -0.58 |
| Pgls     | 0.0141       | -0.01 |
| Acbd3    | 0.377469775  | 0     |
| Acsf3    | -0.2926397   | 0     |
| Adssl1   | 0.05647309   | 0     |
| Agtrap   | -0.14213862  | 0     |
| Ap2a1    | -0.1281815   | 0     |
| Apoo     | -0.2624989   | 0     |
| Aqp1     | -0.4096813   | 0     |
| Asb18    | -0.0580225   | 0     |
| Banf1    | 0.156220133  | 0     |
| Capza2   | 0.12286773   | 0     |
| Coro1a   | 0.266665433  | 0     |
| Cpne3    | 0.127217298  | 0     |
| Crkl     | -0.078251005 | 0     |
| Ctnna2   | -0.01491896  | 0     |
| Cyb5b    | 0.07779917   | 0     |
| D1Pas1   | -0.030741532 | 0     |
| Dohh     | 0.019526959  | 0     |
| Eif5     | 0.11824352   | 0     |
| Eml1     | -0.0802838   | 0     |
| Epn1     | -0.3551324   | 0     |
| Fam174b  | -0.4751806   | 0     |
| Fcgrt    | 0.5348784    | 0     |
| Fscn1    | -0.103653352 | 0     |
| Fxn      | -0.3630333   | 0     |
| G3bp1    | 0.089596256  | 0     |
| Galk1    | 0.2859688    | 0     |
| Gars     | 0.05225118   | 0     |

|           |              |   |
|-----------|--------------|---|
| Gcsh      | 0.09334692   | 0 |
| Glrx5     | -0.2749484   | 0 |
| Gmppb     | 0.3415624    | 0 |
| Gnai2     | 0.36110945   | 0 |
| Gorasp2   | 0.32656095   | 0 |
| Gss       | 0.21000885   | 0 |
| Gsta1     | -0.5692551   | 0 |
| Gstm6     | 0.01441209   | 0 |
| Hbb-y     | 0.00381174   | 0 |
| Hexa      | 0.5972471    | 0 |
| Hnrnpa0   | 0.02013238   | 0 |
| Hrg       | -0.3086303   | 0 |
| Hsd17b12  | 0.53384665   | 0 |
| Itih2     | 0.5699345    | 0 |
| Itih3     | 0.3493174    | 0 |
| Ivns1abp  | -0.533327867 | 0 |
| Map2k2    | -0.044509725 | 0 |
| Mapk1     | -0.014657033 | 0 |
| Mrpl10    | -0.1012761   | 0 |
| Nat13     | 0.242314967  | 0 |
| Ndufs4    | -0.338561    | 0 |
| Nfkb1     | 0.1573795    | 0 |
| Nfs1      | -0.19164945  | 0 |
| Niban     | 0.7688873    | 0 |
| Nid1      | 0.238096233  | 0 |
| Nploc4    | 0.2651129    | 0 |
| Nsf       | -0.0292775   | 0 |
| Nsfl1c    | 0.3154624    | 0 |
| Nudc      | -0.2216908   | 0 |
| Osbp      | -0.3155565   | 0 |
| Pabpc4    | -0.015324115 | 0 |
| Pask      | -0.06484953  | 0 |
| Pdk2      | -0.8758615   | 0 |
| Phka1     | 0.9277565    | 0 |
| Pitrm1    | -0.27674785  | 0 |
| Ppm1b     | 0.254320795  | 0 |
| Ppp1r3a   | -0.378712    | 0 |
| Psma1     | -0.0367302   | 0 |
| Psmb10    | 0.3653399    | 0 |
| Psmd1     | 0.166331765  | 0 |
| Psmd6     | 0.33306025   | 0 |
| Rfk       | 0.202514867  | 0 |
| Rnpep     | -0.2499916   | 0 |
| Rpia      | -0.214887    | 0 |
| Rps11     | 0.2562202    | 0 |
| Sae1      | 0.100361278  | 0 |
| Sdhc      | -0.08811935  | 0 |
| Serpina3a | -0.04264402  | 0 |

|          |              |       |
|----------|--------------|-------|
| Smpd2    | -0.1941004   | 0     |
| Snx2     | 0.2314637    | 0     |
| Stambp   | 0.4284948    | 0     |
| Stard9   | -0.09402591  | 0     |
| Stub1    | -0.130184437 | 0     |
| Thop1    | -0.018236735 | 0     |
| Timm44   | -0.4125983   | 0     |
| Timm8a2  | -0.1092833   | 0     |
| Tmed4    | -0.03459962  | 0     |
| Tom1l2   | -0.003564047 | 0     |
| Trip10   | -0.2792616   | 0     |
| Tsn      | 0.2294274    | 0     |
| Ttc35    | 0.002257983  | 0     |
| Twf1     | 0.688718833  | 0     |
| Twf2     | 0.102292085  | 0     |
| Ube2g1   | 0.09122978   | 0     |
| Ube2v1   | 0.1567337    | 0     |
| Ubxn4    | 0.465613267  | 0     |
| Ufm1     | 0.44225114   | 0     |
| Urod     | -0.32653015  | 0     |
| Vapb     | -0.037245323 | 0     |
| Vps26a   | -0.1031532   | 0     |
| Vps28    | 0.1955004    | 0     |
| Wars     | -0.089995547 | 0     |
| Wdr61    | 0.271587725  | 0     |
| Xpnpep1  | 0.01032829   | 0     |
| Cbr1     | 0.01581446   | 0.03  |
| Lap3     | 0.01367378   | 0.04  |
| Bola3    | -0.001119932 | -0.74 |
| Blvra    | -0.001221021 | -0.68 |
| Sod1     | -0.029684637 | -0.03 |
| Pafah1b1 | -0.001400916 | -0.74 |
| Eef1g    | 0.002896     | 0.36  |
| Gnb2l1   | 0.0229032    | 0.06  |
| Asna1    | 0.003894488  | 0.42  |
| Pycrl    | -0.001672745 | -1    |
| Fga      | -0.003578027 | -0.58 |
| Uba1     | -0.015086965 | -0.14 |
| Prune    | -0.00876453  | -0.26 |
| Eef1a2   | -0.07649962  | -0.03 |
| Slc4a1   | -0.083315465 | -0.03 |
| Myl2     | -0.05516751  | -0.05 |
| Ube2l3   | -0.014187177 | -0.22 |
| Lztf1    | -0.006011378 | -0.58 |
| Katnal2  | -0.00867653  | -0.42 |
| Lnpep    | -0.028409198 | -0.13 |
| Ywhae    | 0.007884435  | 0.49  |
| Taldo1   | 0.00675265   | 0.58  |

|          |              |       |
|----------|--------------|-------|
| Rab11b   | -0.064059036 | -0.07 |
| Ahsa1    | -0.003494    | -1.32 |
| Srl      | -0.04597441  | -0.11 |
| Mb       | -0.039774895 | -0.13 |
| Mug1     | -0.01858854  | -0.29 |
| Acyp2    | -0.01744207  | -0.32 |
| Pthr2    | 0.0133015    | 0.42  |
| Gstm1    | -0.1903328   | -0.03 |
| Numa1    | -0.020244063 | -0.32 |
| Gc       | -0.2282944   | -0.03 |
| Sdhd     | -0.2394222   | -0.03 |
| Csrp3    | 0.068127     | 0.11  |
| Fabp3    | -0.055682655 | -0.15 |
| Esd      | 0.029147357  | 0.29  |
| Vps45    | 0.00254631   | 3.32  |
| Usmg5    | 0.005425135  | 1.58  |
| Sfpq     | -0.034288167 | -0.25 |
| Dnm1l    | -0.039024118 | -0.22 |
| Glo1     | 0.023003971  | 0.4   |
| Dctn4    | 0.025889098  | 0.36  |
| C3       | 0.1602615    | 0.06  |
| Mapkapk2 | 0.02338441   | 0.42  |
| Pygb     | 0.05796941   | 0.17  |
| Dnpep    | 0.111157762  | 0.09  |
| Eif3m    | -0.05665358  | -0.19 |
| Apoa1bp  | -0.07336076  | -0.15 |
| Gdi1     | 0.08486303   | 0.13  |
| Gsta3    | -0.00617297  | -1.81 |
| Ppp2r1a  | -0.104744002 | -0.11 |
| Plg      | 0.0158337    | 0.77  |
| Bola1    | -0.01013175  | -1.22 |
| Ndrp2    | 0.08462397   | 0.15  |
| Ywhab    | 0.211607262  | 0.06  |
| Cisd1    | -0.08906131  | -0.15 |
| Usp5     | -0.06596788  | -0.21 |
| Pgk1     | 0.06382052   | 0.22  |
| Cnbp     | 0.024789494  | 0.58  |
| Ighg1    | -0.1599417   | -0.09 |
| Ube2k    | -0.028348363 | -0.51 |
| Acadl    | -0.2427009   | -0.06 |
| Lypla2   | -0.0153      | -1    |
| Samm50   | -0.307531767 | -0.05 |
| Gsto1    | -0.051716965 | -0.3  |
| Ola1     | 0.09337529   | 0.17  |
| Cryz     | -0.053032062 | -0.3  |
| Ciapi1   | 0.04940155   | 0.33  |
| Scrn2    | -0.3313991   | -0.05 |
| Itih4    | 0.06682459   | 0.25  |

|           |               |       |
|-----------|---------------|-------|
| Ahnak     | 0.024732693   | 0.7   |
| Gdi2      | 0.111505931   | 0.16  |
| Mpi       | -0.2635638    | -0.07 |
| Clta      | 0.084058733   | 0.22  |
| Jph2      | 0.025794025   | 0.72  |
| Ubfd1     | -0.032415065  | -0.58 |
| Cdc37     | 0.01626475    | 1.19  |
| Eprs      | 0.080841982   | 0.24  |
| Eif4b     | 0.04311625    | 0.46  |
| Aldoa     | -0.180540493  | -0.11 |
| Hp        | 0.01877213    | 1.09  |
| Qdpr      | -0.25726035   | -0.08 |
| Acly      | 0.07967025    | 0.26  |
| Ap2b1     | 0.09457734    | 0.22  |
| Rbpms     | 0.05018425    | 0.42  |
| Aco1      | -0.140844239  | -0.15 |
| Rpn1      | 0.19482388    | 0.11  |
| Tomm70a   | 0.014764986   | 1.46  |
| Rpl32     | 0.3113569     | 0.07  |
| Mff       | 0.083970817   | 0.26  |
| Grhpr     | 0.03685252    | 0.6   |
| Akap13    | -0.0111166236 | -2    |
| Mecr      | -0.012029375  | -2    |
| Cse1l     | 0.07666365    | 0.32  |
| Ap2a2     | 0.018773166   | 1.32  |
| Cct7      | -0.095980005  | -0.26 |
| Pdcd5     | 0.01581065    | 1.58  |
| Rps6      | 0.2092751     | 0.12  |
| Serpina3k | -0.061432923  | -0.41 |
| Camk2d    | -0.087055069  | -0.3  |
| Crk       | 0.11943168    | 0.22  |
| Gpld1     | -0.0828015    | -0.32 |
| Pfkp      | -0.04289215   | -0.62 |
| Ndufb10   | -0.3482771    | -0.08 |
| Matr3     | 0.048521414   | 0.58  |
| Gbas      | -0.31313245   | -0.09 |
| Pdha1     | -0.1773283    | -0.16 |
| Tpd52l2   | 0.190575      | 0.15  |
| Huwe1     | -0.2044991    | -0.14 |
| Pdk1      | 0.046597723   | 0.62  |
| Adipoq    | -0.1524633    | -0.19 |
| Atic      | 0.076259705   | 0.38  |
| Myh3      | 0.09156863    | 0.32  |
| Atp6v1e1  | 0.029354335   | 1     |
| Actr1a    | -0.046243875  | -0.64 |
| Paip1     | 0.010110334   | 3     |
| Rps3      | 0.0718723     | 0.43  |
| Hnrnp1    | -0.01936205   | -1.64 |

|           |              |       |
|-----------|--------------|-------|
| Sgcb      | 0.144632767  | 0.22  |
| Guk1      | 0.1452948    | 0.22  |
| Actl6a    | -0.055158887 | -0.58 |
| Acat2     | -0.100134185 | -0.32 |
| Tsfm      | -0.025329195 | -1.29 |
| Apoa1     | -0.042655343 | -0.77 |
| Rpl17     | 0.3342319    | 0.1   |
| Ctbp1     | -0.01848189  | -1.81 |
| Psme2     | -0.1098871   | -0.31 |
| Vdac1     | -0.266113276 | -0.13 |
| Ndufa4    | -0.1098595   | -0.32 |
| Npepps    | -0.08099584  | -0.44 |
| S100a1    | -0.1700455   | -0.21 |
| Psmb7     | 0.03579299   | 1     |
| Heg1      | 0.08539677   | 0.42  |
| Ppif      | -0.32709485  | -0.11 |
| Atox1     | 0.128731335  | 0.28  |
| Mrrf      | -0.04908212  | -0.74 |
| Acat1     | -0.407094933 | -0.09 |
| Hspa8     | 0.152693533  | 0.24  |
| Mpp1      | 0.21645485   | 0.17  |
| Serpina3c | -0.1424963   | -0.26 |
| Spr       | -0.1689097   | -0.22 |
| Msra      | 0.2102788    | 0.18  |
| Uqcrc2    | -0.34439325  | -0.11 |
| Rps17     | 0.093113195  | 0.41  |
| Cryl1     | -0.093554975 | -0.42 |
| Armc1     | -0.016137448 | -2.46 |
| Lypla1    | 0.0696959    | 0.58  |
| Psap      | -0.4049039   | -0.1  |
| Aldh3a2   | 0.02573697   | 1.58  |
| Mgea5     | 0.10053038   | 0.42  |
| Anxa4     | 1.0751179    | 0.04  |
| Canx      | 0.067200767  | 0.64  |
| Ptbp1     | -0.084471433 | -0.51 |
| Cd81      | 0.1137304    | 0.38  |
| Dusp3     | 0.620156167  | 0.07  |
| Serpina1a | -0.13917315  | -0.32 |
| Ndufa5    | -0.40590395  | -0.11 |
| Tiprl     | -0.10765425  | -0.42 |
| Dars      | -0.05586306  | -0.81 |
| Rps18     | -0.029060948 | -1.58 |
| Hibch     | -0.2313126   | -0.2  |
| Polr2j    | -0.029464085 | -1.58 |
| Igh-3     | 0.05505006   | 0.85  |
| Carkd     | 0.214448     | 0.22  |
| Bcam      | 0.2151588    | 0.22  |
| Glod4     | 0.4759184    | 0.1   |



|         |              |       |
|---------|--------------|-------|
| Ppp3r1  | 0.031071597  | 1.58  |
| Nit2    | -0.1368901   | -0.36 |
| Hnrnpd  | -0.044486676 | -1.14 |
| Pdxk    | -0.051186573 | -1    |
| Uqcrh   | -0.13192305  | -0.39 |
| Apoh    | 0.05932155   | 0.87  |
| Atp5a1  | -0.2894234   | -0.18 |
| Cast    | 0.06957223   | 0.75  |
| Ptrf    | 0.180339767  | 0.29  |
| Dbi     | -0.067648413 | -0.78 |
| Rab14   | -0.219915469 | -0.24 |
| Uchl3   | -0.07331594  | -0.72 |
| Mthfd1  | -0.097864887 | -0.54 |
| Tpt1    | -0.409229    | -0.13 |
| Rab2a   | 0.037620676  | 1.42  |
| Hsp90b1 | 0.04660193   | 1.15  |
| Cfl1    | 0.44705455   | 0.12  |
| Agk     | -0.093359065 | -0.58 |
| Nutf2   | 0.07911712   | 0.69  |
| Actr3   | 0.148127967  | 0.37  |
| Rad23b  | 0.073220925  | 0.75  |
| Strap   | 0.131950967  | 0.42  |
| Snd1    | 0.037490547  | 1.49  |
| Ipo5    | 0.044417333  | 1.26  |
| Actn1   | 0.8069556    | 0.07  |
| Atp5b   | -0.1774457   | -0.32 |
| Gaa     | 0.21873855   | 0.26  |
| Fkbp3   | -0.21876095  | -0.26 |
| Snx27   | -0.05712342  | -1    |
| Cat     | 0.112169585  | 0.51  |
| Ndufa13 | -0.3035151   | -0.19 |
| Vcl     | 0.1483887    | 0.39  |
| Lsm2    | -0.04404948  | -1.32 |
| Mat2b   | -0.05835851  | -1    |
| Eif4g1  | -0.1440845   | -0.42 |
| Lta4h   | -0.2162808   | -0.28 |
| Actr1b  | 0.190789898  | 0.32  |
| Gstm2   | -0.2551025   | -0.24 |
| Atp1a4  | -0.1461499   | -0.42 |
| Tpi1    | -0.245782533 | -0.25 |
| Fth1    | -0.024638015 | -2.5  |
| Gstm5   | 0.04500548   | 1.38  |
| Gart    | -0.223133975 | -0.28 |
| Pdia6   | 0.1400342    | 0.45  |
| Ndufa3  | -0.211666267 | -0.3  |
| Eif4g2  | -0.245541622 | -0.26 |
| Spag9   | -0.255609177 | -0.25 |
| Arf1    | 0.1143192    | 0.56  |

|          |              |       |
|----------|--------------|-------|
| Hdlbp    | -0.46790886  | -0.14 |
| Adprh    | 0.20526241   | 0.32  |
| Mosc2    | 0.03298314   | 2     |
| Pgam2    | 0.1180058    | 0.56  |
| Acad10   | -0.1438648   | -0.46 |
| Arhgdia  | 0.3490871    | 0.19  |
| Btf3l4   | 0.17490746   | 0.38  |
| Eea1     | 0.2559271    | 0.26  |
| Rplp2    | 0.121906     | 0.55  |
| Pgp      | -0.06228463  | -1.08 |
| Flot2    | 0.04296685   | 1.58  |
| Ndufc2   | -0.1836869   | -0.37 |
| Vdac2    | -0.1942727   | -0.35 |
| Mtch2    | -0.214268957 | -0.32 |
| Atp5j2   | -0.274375967 | -0.25 |
| Ube2n    | 0.24012165   | 0.29  |
| Rap1gds1 | -0.1207633   | -0.58 |
| Aprt     | 0.1672473    | 0.42  |
| Hnrnpu   | -0.044783938 | -1.58 |
| Krt77    | -0.05244875  | -1.36 |
| Acadm    | -0.1785796   | -0.4  |
| Slc25a3  | -0.1718042   | -0.42 |
| Eif3c    | 0.124979105  | 0.58  |
| Aldoc    | -0.142310055 | -0.51 |
| Ndufb9   | -0.2721807   | -0.27 |
| Srprb    | 0.03715907   | 2     |
| Gng12    | 0.1772987    | 0.42  |
| Ndufs1   | -0.249564175 | -0.3  |
| Sorbs1   | 0.129282883  | 0.58  |
| Chmp5    | 0.181089475  | 0.42  |
| Ndufb11  | -0.2543249   | -0.3  |
| Aco2     | -0.1974212   | -0.39 |
| ldh3g    | -0.21069605  | -0.37 |
| Mif      | -0.134640207 | -0.58 |
| Pfdn5    | 0.134813333  | 0.58  |
| Hspa9    | -0.326671942 | -0.24 |
| Ndufa8   | -0.3761848   | -0.21 |
| Lars     | 0.248648     | 0.32  |
| Tkt      | 0.293069867  | 0.28  |
| Tln2     | -0.101846007 | -0.81 |
| Gstp1    | -0.2852125   | -0.29 |
| Clybl    | -0.08421167  | -1    |
| Lpl      | -0.42337975  | -0.2  |
| Cisd2    | 0.053839327  | 1.58  |
| Clpb     | -0.14731135  | -0.58 |
| Atxn2    | -0.149654702 | -0.58 |
| Pdcd6ip  | 0.32495606   | 0.27  |
| Hist1h1c | 0.11867617   | 0.74  |

|         |              |       |
|---------|--------------|-------|
| Ndufa2  | -0.1722355   | -0.51 |
| Mccc1   | -0.79994015  | -0.11 |
| Lims1   | -0.15202718  | -0.58 |
| Egfr    | 0.17385518   | 0.51  |
| Lman1   | 0.104717248  | 0.85  |
| Acss1   | -0.31950514  | -0.28 |
| Galm    | 0.1956094    | 0.46  |
| Tln1    | 0.301539367  | 0.3   |
| Acaa1a  | -0.157659532 | -0.58 |
| Rbm3    | 0.1578374    | 0.58  |
| Cbr4    | -0.1583242   | -0.58 |
| Ppp2r5a | -0.2199095   | -0.42 |
| Sgcg    | -0.058560783 | -1.58 |
| Lgmn    | 0.2205871    | 0.42  |
| Ube2b   | -0.224207475 | -0.42 |
| Dkc1    | -0.094732227 | -1    |
| Npepl1  | -0.1286176   | -0.74 |
| Gbp2    | 0.041146735  | 2.32  |
| Hmgcl   | 0.04825814   | 2     |
| Hectd1  | 0.027022045  | 3.58  |
| Cdh2    | 0.075699977  | 1.28  |
| Apoa2   | -0.1689731   | -0.58 |
| Gsr     | 0.1973626    | 0.5   |
| Cfl2    | 0.300862307  | 0.33  |
| Nptn    | 0.3891217    | 0.26  |
| Copb2   | 0.174447205  | 0.58  |
| Pura    | 0.162746     | 0.63  |
| Rcn1    | 0.9375049    | 0.11  |
| Ctsd    | 0.2462743    | 0.42  |
| Gmps    | -0.167190567 | -0.62 |
| Golga2  | 0.08544985   | 1.22  |
| Slc25a5 | 0.249122533  | 0.42  |
| Ndufs6  | -0.4767011   | -0.22 |
| Ubac1   | -0.1049404   | -1    |
| Hspb6   | 0.1387879    | 0.76  |
| Rpl8    | 0.1055187    | 1     |
| Gnas    | 0.182006858  | 0.58  |
| F12     | 0.1061036    | 1     |
| Sar1a   | 0.2530575    | 0.42  |
| Igh-6   | -0.092768127 | -1.17 |
| Pkm2    | -0.3619296   | -0.3  |
| Rpl6    | 0.241985     | 0.45  |
| Rtn4ip1 | -0.215197947 | -0.51 |
| Clip1   | 0.457879586  | 0.24  |
| Cpe     | 0.07750025   | 1.42  |
| Eef1d   | -0.110074258 | -1    |
| Ndufb7  | -0.3360243   | -0.33 |
| Atp5c1  | -0.3499932   | -0.32 |

|          |              |       |
|----------|--------------|-------|
| Hn1      | 0.509984733  | 0.22  |
| Sh3glb1  | 0.092433093  | 1.22  |
| Tmem55a  | 0.07965215   | 1.42  |
| Mapt     | 0.043922275  | 2.58  |
| Golga4   | 0.07214144   | 1.58  |
| Dcps     | -0.184413007 | -0.62 |
| Rpl4     | 0.1334047    | 0.86  |
| Pdxdc1   | 0.07275169   | 1.58  |
| Syncrip  | 0.32975372   | 0.35  |
| Ccdc58   | -0.09815725  | -1.18 |
| Aldh2    | -0.23197448  | -0.5  |
| Ppp1cb   | 0.1366526    | 0.85  |
| Naga     | 0.1576665    | 0.74  |
| Cltc     | 0.131294     | 0.89  |
| Prdx6    | -0.17724555  | -0.66 |
| Vcp      | 0.2339665    | 0.5   |
| Auh      | -0.104486647 | -1.12 |
| Igh      | -0.080368065 | -1.46 |
| Blvrb    | -0.110253    | -1.07 |
| Mdh1     | -0.251012436 | -0.47 |
| Clic4    | 0.2326905    | 0.51  |
| Ahcy     | 0.2528518    | 0.47  |
| Ndufa7   | -0.140569626 | -0.85 |
| Tollip   | 0.3076302    | 0.39  |
| Lcat     | -0.05179389  | -2.32 |
| Fubp1    | 0.076604775  | 1.58  |
| Prep     | 0.142077875  | 0.86  |
| Phb2     | -0.371044625 | -0.33 |
| Prkar1a  | 0.22310539   | 0.55  |
| Lzic     | -0.560301633 | -0.22 |
| Pgd      | 0.42972105   | 0.29  |
| Zbtb8os  | 0.192123519  | 0.65  |
| Cox4nb   | 0.095439665  | 1.32  |
| Aldh7a1  | 0.115624213  | 1.09  |
| Aldoart2 | -0.2182029   | -0.58 |
| Ogdh     | -0.7068239   | -0.18 |
| Ilk      | 0.3999081    | 0.32  |
| Atp6v1h  | 0.304704437  | 0.42  |
| Myl4     | 0.22166      | 0.58  |
| Aadacl1  | -0.857492967 | -0.15 |
| Serpina6 | -0.4049732   | -0.32 |
| Rab10    | 0.08209176   | 1.58  |
| Dnm2     | -0.098705816 | -1.32 |
| Rars     | 0.3158719    | 0.42  |
| Eif6     | 0.152755895  | 0.87  |
| Hspa2    | 0.6655316    | 0.2   |
| Chchd10  | -0.24252095  | -0.55 |
| Eif4a3   | 0.05171267   | 2.58  |

|               |              |       |
|---------------|--------------|-------|
| Mdh2          | -0.29004115  | -0.46 |
| Krt19         | -0.07378165  | -1.81 |
| PsmA6         | 0.224217495  | 0.6   |
| Glud1         | -0.1751286   | -0.77 |
| Adprhl1       | 0.1226645    | 1.1   |
| Ppm1f         | -0.11860076  | -1.14 |
| Tmod1         | -0.3612722   | -0.38 |
| Nudt2         | -0.03617859  | -3.81 |
| Fkbp8         | 0.1380355    | 1     |
| Cox6c         | -0.13816195  | -1    |
| Pgk2          | -0.1137021   | -1.22 |
| Rab12         | -0.11390732  | -1.22 |
| NdrG1         | 0.139546396  | 1     |
| Scfd1         | 0.054149203  | 2.58  |
| Ivd           | -0.3106772   | -0.45 |
| 1300017J02Rik | -0.05625184  | -2.5  |
| Clu           | -0.335016075 | -0.42 |
| Rpl7          | 0.207141118  | 0.68  |
| D10Jhu81e     | -0.4556182   | -0.31 |
| Fetub         | 0.2774955    | 0.51  |
| Tnnt2         | -0.315176233 | -0.45 |
| Hrc           | -0.38384455  | -0.37 |
| Copb1         | 0.4477577    | 0.32  |
| Spcs2         | 0.24877104   | 0.58  |
| Pdia3         | 0.157079935  | 0.92  |
| Psmc2         | 0.16936795   | 0.86  |
| Fech          | -0.062922993 | -2.32 |
| Grcc10        | -0.25285825  | -0.58 |
| Apoc2         | -0.3002947   | -0.49 |
| Cryab         | 0.184749703  | 0.8   |
| Pmpca         | -0.30193885  | -0.49 |
| Casq2         | 0.195193     | 0.76  |
| Saa4          | -0.0496622   | -3    |
| Ndufs2        | -0.2365897   | -0.63 |
| Nt5c3         | -0.2012777   | -0.75 |
| Ogn           | 1.080408     | 0.14  |
| Sh3kbp1       | -0.151502425 | -1    |
| Iqgap1        | 0.20020786   | 0.76  |
| Garnl1        | -0.152229661 | -1    |
| Pmpcb         | -0.066188175 | -2.32 |
| Pxn           | -0.125980487 | -1.22 |
| Hsp90ab1      | 0.16039165   | 0.96  |
| Cycs          | -0.215204175 | -0.72 |
| Dync1h1       | 0.244270575  | 0.64  |
| Prkaa1        | 0.09908199   | 1.58  |
| PsmD4         | 0.24569993   | 0.64  |
| Cox7a2        | -0.12965665  | -1.22 |
| Cxadr         | -0.100663498 | -1.58 |

|         |              |       |
|---------|--------------|-------|
| Echdc1  | -0.0533123   | -3    |
| Abce1   | 0.160022833  | 1     |
| Man2c1  | 0.10200355   | 1.58  |
| Ubqln1  | 0.111190967  | 1.46  |
| Apool   | -0.191681067 | -0.85 |
| Gda     | 0.090125823  | 1.81  |
| Pasma5  | 0.56413      | 0.29  |
| Sri     | 0.094199033  | 1.74  |
| Ndufb6  | -0.1046748   | -1.58 |
| Rps20   | 0.22400045   | 0.74  |
| Ehbp111 | 0.3022159    | 0.55  |
| Cul1    | 0.06475989   | 2.58  |
| Cutc    | -0.1059839   | -1.58 |
| Rps10   | 0.167593817  | 1     |
| Anpep   | 0.5278504    | 0.32  |
| Krt5    | -0.07287201  | -2.32 |
| Ppme1   | -0.06569131  | -2.58 |
| Dpysl2  | 0.49879295   | 0.34  |
| Azgp1   | -0.2926874   | -0.58 |
| Rpl22   | 0.5354754    | 0.32  |
| Prkaca  | -0.2463083   | -0.7  |
| Ndufab1 | -0.34018976  | -0.51 |
| Uqcrq   | -0.159519963 | -1.09 |
| Atp5f1  | -0.30580905  | -0.57 |
| Npm1    | 0.4151624    | 0.42  |
| lars    | -0.17447345  | -1    |
| Cdv3    | 0.357840955  | 0.49  |
| Cops2   | 0.4185818    | 0.42  |
| Sugt1   | 0.123875305  | 1.42  |
| Hspa4   | 0.266771855  | 0.66  |
| Nars    | 0.49153405   | 0.36  |
| Psmc3   | 0.1123505    | 1.58  |
| Pts     | -0.20646905  | -0.86 |
| St13    | 0.255615     | 0.7   |
| Fgf1    | 0.136477633  | 1.32  |
| Tnni3   | -0.2693456   | -0.67 |
| Oat     | -0.1056668   | -1.71 |
| Sil1    | 0.1145964    | 1.58  |
| Qars    | -0.183326558 | -1    |
| Apcs    | -0.1836658   | -1    |
| Phpt1   | -0.2742128   | -0.67 |
| Copz1   | 0.1171907    | 1.58  |
| Tpm4    | 0.5800686    | 0.32  |
| C1qbp   | -0.2900516   | -0.64 |
| Got2    | -0.4657304   | -0.4  |
| Ap1b1   | -0.1701695   | -1.1  |
| Cp      | 1.71640705   | 0.11  |
| Acad9   | -0.208131867 | -0.91 |

|           |              |       |
|-----------|--------------|-------|
| Dynll2    | 0.11283795   | 1.68  |
| Calm1     | 0.270863991  | 0.7   |
| Dhrs4     | -0.488708    | -0.39 |
| Eif3d     | 0.082154035  | 2.32  |
| Ywhah     | 0.4057541    | 0.47  |
| Bsdc1     | 0.095540385  | 2     |
| Hmgb1     | 0.1621215    | 1.18  |
| Ctsb      | 0.171512835  | 1.13  |
| Dld       | -0.281082995 | -0.69 |
| Krt78     | -0.0789334   | -2.46 |
| Rpl23     | 0.256188567  | 0.76  |
| Cops7a    | -0.064914065 | -3    |
| Oplah     | -0.8517787   | -0.23 |
| Ppp2ca    | 0.2928101    | 0.67  |
| Rtn3      | 0.04083636   | 4.81  |
| Sf3b1     | 0.065518618  | 3     |
| Gps1      | 0.2661645    | 0.74  |
| Ndufs8    | -0.32895535  | -0.6  |
| Pam       | 0.6170813    | 0.32  |
| Coro7     | 0.139178472  | 1.42  |
| Rdx       | 0.143553967  | 1.38  |
| Mpst      | -0.1140544   | -1.74 |
| Ndufa12   | -0.283537675 | -0.7  |
| Hps6      | -0.07743088  | -2.58 |
| Tfg       | -0.08703247  | -2.32 |
| Tmed10    | 0.33141232   | 0.61  |
| Hist1h2bb | 0.27063322   | 0.75  |
| Pcca      | -0.36522105  | -0.56 |
| Rps4x     | 0.1598679    | 1.28  |
| Cox5a     | -0.222618    | -0.92 |
| Ddb1      | 0.489706     | 0.42  |
| Mrps36    | -0.4200172   | -0.49 |
| Tufm      | -0.381220225 | -0.54 |
| Ppm1a     | 0.317367525  | 0.65  |
| Rps7      | 0.3627227    | 0.57  |
| Vapa      | 0.1219283    | 1.7   |
| Ankfy1    | 0.158060735  | 1.32  |
| Itpa      | 0.19859655   | 1.06  |
| Sncg      | -0.2110197   | -1    |
| Arl6ip5   | 0.3649289    | 0.58  |
| Ldhb      | -0.461287975 | -0.46 |
| Hnrnpa2b1 | -0.341745205 | -0.63 |
| Stat3     | 0.16987738   | 1.27  |
| Cfd       | -0.2159829   | -1    |
| Sh3bgr    | 0.11225379   | 1.93  |
| Pcbp1     | 0.2560272    | 0.85  |
| Nnt       | -0.609421067 | -0.36 |
| Farsa     | -0.0945823   | -2.32 |

|         |              |       |
|---------|--------------|-------|
| Rhoa    | 0.093385516  | 2.35  |
| Mapre3  | 0.1217143    | 1.81  |
| Etfp    | -0.2857443   | -0.78 |
| Timm9   | -0.1311849   | -1.7  |
| Samhd1  | -0.074585833 | -3    |
| Prdx3   | -0.298742    | -0.75 |
| Kbtbd10 | 0.6060352    | 0.37  |
| Rac1    | 0.0626933    | 3.58  |
| Mccc2   | -0.3630957   | -0.62 |
| Ncstn   | 0.07517934   | 3     |
| Hadhb   | -0.582156233 | -0.39 |
| Bckdk   | -0.11369882  | -2    |
| Slc25a4 | -0.322402875 | -0.71 |
| Art3    | -0.3957264   | -0.58 |
| Ehd4    | 0.4333998    | 0.53  |
| Stx12   | 0.2956711    | 0.78  |
| Hk2     | -0.4625753   | -0.5  |
| Ubxn6   | -0.1331409   | -1.74 |
| Dnaja3  | -0.313546533 | -0.74 |
| Clic1   | 0.1725668    | 1.36  |
| Fis1    | 0.2065878    | 1.14  |
| Actb    | 0.369004752  | 0.64  |
| Ldb3    | 0.3538774    | 0.67  |
| Ubr4    | 0.1190758    | 2     |
| Cand1   | 0.3527037    | 0.68  |
| Ckm     | -0.4361035   | -0.55 |
| Mcat    | -0.1985474   | -1.22 |
| Kpna4   | 0.41793665   | 0.58  |
| Macrodl | -0.6953726   | -0.35 |
| Tagln2  | 0.53051566   | 0.46  |
| Mrpl12  | -0.2747056   | -0.89 |
| Ccbl2   | -0.8168179   | -0.3  |
| Podxl   | -0.58459455  | -0.42 |
| Iars2   | -0.2586499   | -0.95 |
| Atp6v1a | 0.37912655   | 0.65  |
| Rps16   | 0.08495378   | 2.91  |
| Lman2   | 0.132382535  | 1.87  |
| Ndufs3  | -0.3657913   | -0.68 |
| Dnajb4  | 0.395635767  | 0.63  |
| Pygm    | -0.453701    | -0.55 |
| Prdx5   | -0.3130436   | -0.81 |
| Ppp5c   | -0.201440267 | -1.26 |
| Capzb   | 0.286807788  | 0.89  |
| Fundc2  | -0.25539605  | -1    |
| Cyc1    | -0.3662713   | -0.7  |
| Ensa    | 0.44329535   | 0.58  |
| Aifm1   | -0.4437005   | -0.58 |
| Strn3   | 0.072550567  | 3.58  |



|               |              |       |
|---------------|--------------|-------|
| Arfp1         | 0.6194782    | 0.42  |
| Acp6          | -0.2683249   | -0.97 |
| Cct8          | 0.283261395  | 0.92  |
| Itga7         | 0.1976023    | 1.32  |
| Kpna3         | 0.197875337  | 1.32  |
| Fhl2          | -0.1663062   | -1.58 |
| Scp2          | -0.251264825 | -1.05 |
| Pfkm          | -0.5407391   | -0.49 |
| Ldha          | -0.5665852   | -0.47 |
| Ak3           | -0.118383964 | -2.25 |
| S100a9        | 0.4663043    | 0.58  |
| Cyb5r3        | 0.650216115  | 0.42  |
| Ak2           | -0.16613705  | -1.65 |
| Xdh           | -0.5486822   | -0.5  |
| Xirp1         | 0.3871536    | 0.71  |
| Gnb2          | 0.1415669    | 1.96  |
| Vdac3         | -0.243687    | -1.14 |
| 1810022C23Rik | -0.1761739   | -1.58 |
| Psm2          | 0.2441721    | 1.14  |
| Suclg2        | -0.36177665  | -0.77 |
| Abcd3         | -0.2793498   | -1    |
| Rrbp1         | 0.187130933  | 1.5   |
| Bmp10         | 0.07033396   | 4     |
| Hibadh        | -0.332495067 | -0.85 |
| Cox7a2l       | 0.12218019   | 2.32  |
| Acadsb        | -0.2201751   | -1.29 |
| Col15a1       | 0.9797843    | 0.29  |
| Vamp2         | 0.14227055   | 2     |
| Txnrd2        | -0.180986633 | -1.58 |
| Sec31a        | 0.2166487    | 1.32  |
| Lancl1        | 0.08043305   | 3.58  |
| Cops5         | 0.18228364   | 1.58  |
| Psm7          | 0.18258825   | 1.58  |
| Mapk3         | 0.1336765    | 2.17  |
| Got1          | -0.4720268   | -0.62 |
| Sucla2        | -0.19785559  | -1.48 |
| Rad23a        | -0.16029596  | -1.85 |
| Grpel1        | -0.1877155   | -1.58 |
| Glrx3         | -0.215182129 | -1.38 |
| ldh3b         | -0.4073498   | -0.73 |
| Tacc2         | -0.2980159   | -1    |
| Pdia4         | 0.188783     | 1.58  |
| Rpl15         | 0.25204675   | 1.19  |
| Myh9          | 0.223868635  | 1.34  |
| D2hgdh        | -0.237062275 | -1.27 |
| Des           | 0.26885399   | 1.12  |
| Otud6b        | 0.1667833    | 1.81  |
| Calr          | 0.222198567  | 1.36  |

|          |              |       |
|----------|--------------|-------|
| Ehd2     | -0.348488025 | -0.87 |
| Tuba1b   | 0.4891447    | 0.62  |
| Tubb6    | 0.2009533    | 1.51  |
| Rpl12    | 0.39494685   | 0.77  |
| Atp6v1b2 | -0.2604216   | -1.17 |
| Rplp1    | 0.347        | 0.88  |
| Kars     | -0.3055315   | -1    |
| Acads    | -0.3934978   | -0.79 |
| Acy1     | -0.438158    | -0.71 |
| H2-Q10   | -0.1038102   | -3    |
| Fkbp4    | -0.577498333 | -0.54 |
| Ywhaz    | 0.476848657  | 0.66  |
| Bpnt1    | 0.19930605   | 1.58  |
| Gstz1    | -0.1358039   | -2.32 |
| Rps15a   | 0.112792485  | 2.81  |
| Mars     | 0.1593672    | 2     |
| Rpl11    | 0.3190314    | 1     |
| Adk      | -0.502263817 | -0.64 |
| Krt2     | -0.1147377   | -2.81 |
| G3bp2    | 0.204253433  | 1.58  |
| Cops4    | 0.1751493    | 1.85  |
| Bola2    | 0.439371038  | 0.74  |
| Ndufv1   | -0.493968967 | -0.66 |
| Gpx1     | 0.600873     | 0.55  |
| Pacsin3  | 0.3320769    | 1     |
| Abcb8    | -0.25174015  | -1.32 |
| Rpl31    | 0.2741517    | 1.22  |
| Dcun1d1  | 0.33666444   | 1     |
| Psma4    | 0.3575802    | 0.95  |
| Sdha     | -0.52449895  | -0.65 |
| Etfdh    | -0.56884635  | -0.6  |
| Cpox     | -0.412328348 | -0.83 |
| Dync1i2  | 0.4465882    | 0.77  |
| Prdx4    | 0.34557258   | 1     |
| Hk1      | 0.4557379    | 0.76  |
| Syap1    | 0.219676995  | 1.58  |
| Sgta     | -0.2204062   | -1.58 |
| Rsu1     | 0.14434505   | 2.42  |
| Apoa4    | -0.176066    | -2    |
| Pfn1     | 0.4588276    | 0.77  |
| Inmt     | 0.6093104    | 0.58  |
| Ppp1r7   | 0.2491442    | 1.42  |
| Slc27a1  | -0.93725105  | -0.38 |
| Macf1    | 0.10923699   | 3.32  |
| Pgrmc1   | 0.8703461    | 0.42  |
| Appl1    | 0.2770443    | 1.32  |
| Uqcrc1   | -0.5695851   | -0.65 |
| Coq9     | -0.4263239   | -0.87 |

|           |              |       |
|-----------|--------------|-------|
| Hbxip     | 0.3193016    | 1.17  |
| Pank4     | -0.2830544   | -1.32 |
| Akap2     | 0.506224187  | 0.74  |
| Oxct1     | -0.335553175 | -1.12 |
| Nt5c2     | 0.237958263  | 1.58  |
| Clint1    | 0.105141261  | 3.58  |
| Cd163     | 0.2383092    | 1.58  |
| Gspt1     | 0.241370133  | 1.58  |
| Eif3e     | 0.24282526   | 1.58  |
| Ipo7      | 0.166139743  | 2.32  |
| Sh3bgrl3  | 0.9222193    | 0.42  |
| Aldh6a1   | -0.808295    | -0.48 |
| Cnpy2     | 0.319130375  | 1.22  |
| Plxnb2    | 0.1756976    | 2.22  |
| Rps19     | 0.21729313   | 1.81  |
| Anxa7     | 0.414361363  | 0.95  |
| Rtn2      | -0.9459972   | -0.42 |
| Tdrd5     | -0.1715838   | -2.32 |
| Ehd1      | -0.164973983 | -2.42 |
| Psmc3     | 0.1429914    | 2.81  |
| ldh3a     | -0.46921705  | -0.86 |
| Impa1     | 0.1564074    | 2.58  |
| Ctbs      | 0.256357233  | 1.58  |
| Hadha     | -0.7383311   | -0.55 |
| Psmc4     | 0.44230665   | 0.92  |
| Gnb1      | 0.286803652  | 1.42  |
| Zadh2     | -0.5222747   | -0.78 |
| Dynlrb1   | 0.3494097    | 1.17  |
| Etfb      | -0.6594973   | -0.62 |
| Slc25a13  | -0.434069    | -0.95 |
| Marcks    | 0.741336357  | 0.56  |
| Cpt2      | -0.7093668   | -0.59 |
| Pgrmc2    | 0.2654831    | 1.58  |
| Tfrc      | 0.2099084    | 2     |
| Alad      | -0.6084957   | -0.69 |
| Atp1a2    | -0.51956004  | -0.81 |
| Rab11fip5 | 0.52295195   | 0.81  |
| Dync1li1  | 0.6651786    | 0.64  |
| Ide       | -0.18388131  | -2.32 |
| Bat3      | -0.1289549   | -3.32 |
| Pkia      | -0.2367741   | -1.81 |
| Ssb       | 0.351670525  | 1.22  |
| Apeh      | -0.2338171   | -1.85 |
| Rabggta   | -0.2759511   | -1.58 |
| Asrgl1    | -0.3310106   | -1.32 |
| Eif3a     | 0.4408536    | 1     |
| Fyco1     | -0.24577715  | -1.81 |
| Hspb2     | 0.6671092    | 0.67  |

|            |              |       |
|------------|--------------|-------|
| Itgb1      | 0.448020782  | 1     |
| Ckmt2      | -0.439599    | -1.02 |
| Tex15      | -0.2263862   | -2    |
| Col6a1     | 1.215953     | 0.38  |
| Txlnb      | -0.46212355  | -1    |
| Itgav      | 0.293868406  | 1.58  |
| Anxa1      | 0.87931118   | 0.53  |
| Amacr      | -0.6337099   | -0.74 |
| Serpina1b  | -0.3150009   | -1.49 |
| Oxnad1     | -0.27039525  | -1.74 |
| Ece1       | 0.158850917  | 3     |
| Aup1       | 0.1198572    | 4     |
| Thy1       | 0.416927     | 1.17  |
| Tubb5      | 0.63438225   | 0.77  |
| Ndufa6     | -0.3092063   | -1.58 |
| Cabc1      | -0.42157785  | -1.16 |
| Acsl1      | -0.4899892   | -1    |
| Hspd1      | -0.4228404   | -1.16 |
| Vamp3      | 0.2757094    | 1.81  |
| Rnh1       | 0.3933496    | 1.27  |
| Flna       | 0.2499409    | 2     |
| Bves       | 0.341296     | 1.47  |
| Blmh       | 0.17890455   | 2.81  |
| Psmb5      | 0.1792564    | 2.81  |
| Vps35      | 0.3629665    | 1.39  |
| Cdh7       | -0.16928115  | -3    |
| Ppp2r5e    | 0.32423672   | 1.58  |
| Aldh4a1    | -0.5231441   | -0.98 |
| Pi4k2a     | 0.3246799    | 1.58  |
| Acadvl     | -0.7441034   | -0.69 |
| Parp4      | 0.1547575    | 3.32  |
| Suclg1     | -0.5535965   | -0.93 |
| Cox7a1     | -0.6868207   | -0.75 |
| Csad       | 0.2588464    | 2     |
| H2-L       | 0.2011347    | 2.58  |
| Golga3     | 0.6112445    | 0.85  |
| Aars       | 0.2878095    | 1.81  |
| Lpp        | 0.414959645  | 1.26  |
| Krt81      | -0.1467272   | -3.58 |
| Hspb1      | 0.71328285   | 0.74  |
| Erap1      | -0.1761933   | -3    |
| Hist2h2aa1 | 0.2438505    | 2.17  |
| Hmbs       | -0.2972431   | -1.81 |
| Gsta4      | -0.4365508   | -1.24 |
| Nedd4      | 0.4018471    | 1.35  |
| Nqo2       | -0.80096225  | -0.68 |
| Ech1       | -0.5525942   | -0.99 |
| Hadh       | -0.463658167 | -1.18 |

|          |              |       |
|----------|--------------|-------|
| Coq6     | -0.393369    | -1.4  |
| Slc3a2   | 0.3499155    | 1.58  |
| Cap1     | 0.53174035   | 1.04  |
| Mfap4    | 2.518617     | 0.22  |
| Ube2a    | 0.140830525  | 4     |
| Cdc42    | 0.518658325  | 1.09  |
| Tbca     | 0.622340433  | 0.91  |
| Eif3b    | 0.2114439    | 2.7   |
| Ndufa10  | -0.4810842   | -1.21 |
| Krt79    | -0.1310115   | -4.46 |
| Fabp4    | -0.94018115  | -0.63 |
| Cnn3     | 1.025586367  | 0.58  |
| Erp29    | 0.2980318    | 2     |
| Enpp6    | 0.37918895   | 1.58  |
| Wdr1     | 0.5116219    | 1.18  |
| Capns1   | 0.2085247    | 2.91  |
| Dnajb11  | 0.3845692    | 1.58  |
| Calu     | 0.329763795  | 1.85  |
| Scrn3    | -0.42966715  | -1.44 |
| Dab2     | 0.391710775  | 1.58  |
| Uqcc     | -0.310341665 | -2    |
| Fahd1    | -0.3051914   | -2.05 |
| Cul4a    | 0.2085924    | 3     |
| Slc25a12 | -0.441578148 | -1.42 |
| Cav1     | -0.3971106   | -1.58 |
| Sec23a   | 0.3977953    | 1.58  |
| Nfu1     | 0.1906398    | 3.32  |
| Tbcel    | 0.3174677    | 2     |
| Pf4      | 0.4843458    | 1.32  |
| Rab18    | 0.35349175   | 1.81  |
| Echs1    | -0.5162293   | -1.24 |
| Gsn      | 0.543376967  | 1.18  |
| Pfn2     | 0.2769789    | 2.32  |
| Fh1      | -0.4968659   | -1.3  |
| Hsd17b10 | -0.69784945  | -0.93 |
| Sod2     | -0.7132945   | -0.91 |
| Txndc12  | 0.3825067    | 1.7   |
| Palld    | 0.217266073  | 3     |
| Klc1     | 0.290826567  | 2.25  |
| Lrpap1   | 0.489226175  | 1.35  |
| Ndrp3    | 0.6672523    | 1     |
| Crip2    | -0.6688531   | -1    |
| Ezr      | -0.850398    | -0.79 |
| Ranbp1   | 0.4253069    | 1.58  |
| Scly     | -0.224084625 | -3    |
| Anxa2    | 0.569098797  | 1.19  |
| Till12   | 0.27572264   | 2.46  |
| Purb     | 0.191943636  | 3.58  |

|           |              |       |
|-----------|--------------|-------|
| Bag3      | 0.5247771    | 1.31  |
| Acsl5     | 0.4355618    | 1.58  |
| Nhlrc2    | 0.438376933  | 1.58  |
| Wipi1     | 0.208827295  | 3.32  |
| Actg1     | 0.4396772    | 1.58  |
| Tars2     | -0.23741215  | -3    |
| Tuba1a    | 1.015376     | 0.71  |
| Asph      | 0.223982514  | 3.22  |
| Tagln     | 0.5466194    | 1.32  |
| Gja1      | -0.308555067 | -2.38 |
| Pycard    | -0.246089663 | -3    |
| Mcee      | -0.5203031   | -1.42 |
| Lrrc59    | 0.41790995   | 1.77  |
| Hsdl2     | -0.70011445  | -1.06 |
| Ckb       | 1.07745      | 0.69  |
| Gimap4    | -0.451011    | -1.65 |
| Cab39     | 0.1964558    | 3.81  |
| Arfgap1   | 0.3758214    | 2     |
| Eno3      | -1.002674    | -0.75 |
| Txn2      | -0.3764192   | -2    |
| ldh1      | -0.5060177   | -1.49 |
| Aspscr1   | 0.251659565  | 3     |
| Slc2a4    | -0.95968915  | -0.79 |
| Cars2     | -0.211830737 | -3.58 |
| Acacb     | -0.480742935 | -1.58 |
| Mrc1      | 0.6806495    | 1.12  |
| Hsph1     | 0.5836501    | 1.32  |
| Mcfd2     | 0.2330701    | 3.32  |
| Wfs1      | 0.5928402    | 1.32  |
| Csrp1     | 0.8997199    | 0.87  |
| Tubb2a    | 1.50805325   | 0.52  |
| Ak3l1     | -0.586028433 | -1.34 |
| Cstb      | 0.70325915   | 1.12  |
| Myo1c     | 0.3788129    | 2.09  |
| Fasn      | 0.5016206    | 1.58  |
| Sirt5     | -0.438550367 | -1.83 |
| Nucb1     | 0.2599719    | 3.09  |
| Sorbs2    | 0.47602365   | 1.69  |
| Decr1     | -1.03814405  | -0.78 |
| Col6a3    | 0.4913947    | 1.65  |
| Uchl1     | 1.162117     | 0.7   |
| Dpep1     | 1.175013     | 0.7   |
| Ccbl1     | -0.682001425 | -1.21 |
| Acot9     | 1.02111      | 0.81  |
| Tubb2b    | 1.532413     | 0.54  |
| Acy3      | -0.5883473   | -1.42 |
| Rilp      | -0.3616409   | -2.32 |
| Serpinb6b | 0.9326401    | 0.9   |

|          |              |       |
|----------|--------------|-------|
| Dstn     | 0.8792375    | 0.96  |
| Grsf1    | -0.327863475 | -2.58 |
| Pon3     | 0.282364     | 3     |
| S100a10  | 0.847346593  | 1     |
| Tomm40   | -0.2553005   | -3.32 |
| Prkcsh   | 0.2237727    | 3.81  |
| Pptc7    | -0.5409415   | -1.58 |
| Flot1    | 0.4281912    | 2     |
| Glul     | 0.75412945   | 1.15  |
| Asah1    | 0.3744901    | 2.32  |
| Naprt1   | -0.5234016   | -1.66 |
| Hsp90aa1 | 0.776987418  | 1.12  |
| Sqstm1   | 0.292079205  | 3     |
| Smyd1    | -0.389653667 | -2.25 |
| Sdpr     | -0.634810667 | -1.42 |
| Spg20    | 0.425646467  | 2.12  |
| Naglu    | 0.2524048    | 3.58  |
| Tst      | -0.4529708   | -2    |
| Inpp5a   | 0.2758786    | 3.32  |
| Dci      | -1.110257    | -0.83 |
| Eng      | 0.3089412    | 3     |
| Nudcd2   | 0.51423245   | 1.81  |
| Me3      | -0.6781673   | -1.39 |
| P4hb     | 0.6788848    | 1.39  |
| Echdc2   | -0.4602045   | -2.06 |
| Mfge8    | 0.6005023    | 1.58  |
| Smtn     | -0.4753408   | -2    |
| Coq7     | -0.4492935   | -2.12 |
| Adhfe1   | -0.8158134   | -1.17 |
| Dpp3     | 0.5016244    | 1.93  |
| Mut      | -0.645607433 | -1.5  |
| Vim      | 1.1675139    | 0.83  |
| Clip2    | 0.2933437    | 3.32  |
| Rps5     | 0.2722763    | 3.58  |
| Gcdh     | -0.6191943   | -1.58 |
| Cap2     | 0.468352     | 2.09  |
| Emd      | 0.2739595    | 3.58  |
| Capg     | 1.3298669    | 0.74  |
| Mmab     | -0.27670674  | -3.58 |
| Copg     | 0.38583835   | 2.58  |
| Serpinh1 | 0.77295235   | 1.29  |
| Tpd52    | 0.24943347   | 4     |
| M6prbp1  | -1.1922      | -0.84 |
| Copa     | 0.3564953    | 2.81  |
| Rras2    | 0.7400454    | 1.36  |
| Gpx3     | 2.055093     | 0.49  |
| Prodh    | -0.5052698   | -2    |
| Slc25a11 | -0.5584043   | -1.81 |

|          |              |       |
|----------|--------------|-------|
| Nqo1     | 0.6788839    | 1.5   |
| Pet112l  | -0.34352035  | -3    |
| Uqcr     | -0.288943    | -3.58 |
| Dmd      | 0.658464225  | 1.58  |
| Pdlim5   | 1.609663443  | 0.65  |
| Yap1     | 0.4823122    | 2.17  |
| Rock1    | 0.37373742   | 2.81  |
| Gpsm1    | -0.799493367 | -1.32 |
| Adfp     | -0.3779497   | -2.81 |
| Serping1 | 1.143098     | 0.93  |
| Chchd6   | 0.4964881    | 2.17  |
| Fmo2     | 0.283260818  | 3.81  |
| Colec12  | 1.861722     | 0.58  |
| Bcat2    | -0.9003966   | -1.24 |
| Cs       | -0.6601217   | -1.7  |
| Tubb3    | 0.3387775    | 3.32  |
| Acot3    | -0.2814206   | -4    |
| S100a6   | 1.756311     | 0.65  |
| Fkbp2    | 0.3831425    | 3     |
| Akap12   | 0.9427573    | 1.22  |
| Ppib     | 0.8536595    | 1.36  |
| Capn2    | 0.6917184    | 1.68  |
| Mtpn     | 1.035307067  | 1.14  |
| Crat     | -0.609548233 | -1.95 |
| Mfn1     | -0.603657    | -2    |
| Echdc3   | -0.4692488   | -2.58 |
| Twsg1    | 0.404605367  | 3     |
| Cfh      | 2.1432495    | 0.58  |
| Bckdhb   | -0.735693    | -1.7  |
| Tmem143  | -0.417961145 | -3    |
| Lmna     | 0.634230548  | 2     |
| Mapk14   | -0.294818823 | -4.32 |
| Msn      | 0.95278355   | 1.35  |
| Cd9      | 1.520846     | 0.85  |
| Lum      | 1.43046      | 0.91  |
| Ctps     | 0.435613     | 3     |
| Gdpd1    | -0.44082045  | -3    |
| Limd1    | 0.36941085   | 3.58  |
| Fbn1     | 0.860231723  | 1.54  |
| Picalm   | 0.596931472  | 2.22  |
| Ddah2    | 0.6362209    | 2.09  |
| Creg1    | -0.5902106   | -2.32 |
| Txndc5   | 1.1057681    | 1.25  |
| Pkp2     | 0.464748145  | 3     |
| Slc44a2  | 0.4652326    | 3     |
| As3mt    | -0.4238615   | -3.32 |
| Myl7     | 0.6498817    | 2.17  |
| Apip     | -0.5223538   | -2.7  |



|         |              |       |
|---------|--------------|-------|
| Copz2   | 0.3976558    | 3.58  |
| Cd55    | 0.905919425  | 1.58  |
| Dbt     | -0.6301114   | -2.29 |
| Txndc17 | 0.483764985  | 3     |
| Pccb    | -0.4876563   | -3    |
| Pls3    | 0.9274607    | 1.58  |
| Lrpprc  | -0.8841426   | -1.66 |
| Nap111  | 0.545777167  | 2.7   |
| Fblim1  | -0.49130755  | -3    |
| Lgals1  | 1.0690092    | 1.38  |
| Carhsp1 | 1.0395597    | 1.42  |
| Sephs2  | -0.49400875  | -3    |
| L2hgdh  | -0.4491024   | -3.32 |
| Nampt   | -1.130114    | -1.34 |
| Entpd2  | 0.8470535    | 1.81  |
| Dnaja1  | 0.512809133  | 3     |
| Bckdha  | -0.7737954   | -2    |
| Acaa2   | -1.336184667 | -1.16 |
| Sord    | -1.2762355   | -1.22 |
| Scrn1   | 0.5237606    | 3     |
| Myom2   | -0.8039508   | -1.99 |
| Hspa1a  | 1.587481     | 1.03  |
| Uso1    | 0.5035963    | 3.32  |
| Thbs1   | 1.677313     | 1     |
| Mgll    | -0.65132875  | -2.58 |
| Stab1   | 0.7294674    | 2.32  |
| Fn1     | 0.86851675   | 2     |
| Fkbp7   | 0.486266995  | 3.58  |
| Msr3    | 0.66659785   | 2.63  |
| Mvp     | 0.7284983    | 2.42  |
| Dpysl3  | 1.1191203    | 1.58  |
| Mlycd   | -0.7637612   | -2.32 |
| Rras    | 0.9843457    | 1.81  |
| Slmap   | 0.4758452    | 3.81  |
| Acot2   | -0.8938253   | -2.1  |
| Entpd1  | 0.636803633  | 3     |
| Ace     | 1.1367105    | 1.69  |
| Nrap    | 0.401803     | 4.81  |
| Pofut2  | 0.54835175   | 3.58  |
| Sec22b  | 0.59234445   | 3.32  |
| Ndufa9  | -0.4417079   | -4.46 |
| Col6a2  | 1.093727     | 1.81  |
| Cmb1    | -1.35699     | -1.46 |
| Anxa5   | 1.115011     | 1.79  |
| Pcyox1  | 0.57747688   | 3.46  |
| Dynll1  | 1.3081141    | 1.54  |
| Abat    | 0.6786531    | 3     |
| Sparc   | 0.6837978    | 3     |

|               |              |       |
|---------------|--------------|-------|
| Psme1         | -1.115527    | -1.84 |
| Isoc1         | -0.745813167 | -2.81 |
| Zyx           | 0.7106249    | 3     |
| Arpc1b        | 0.64424975   | 3.32  |
| Lipa          | 0.734499133  | 3     |
| 2900073G15Rik | 0.55176945   | 4     |
| Pdlim3        | 0.5833267    | 3.81  |
| Mrc2          | 1.2361921    | 1.81  |
| Bdh1          | 1.0456015    | 2.2   |
| Myl1          | 2.941409     | 0.81  |
| Ptgis         | 0.9375619    | 2.58  |
| S100a11       | 1.368092     | 1.81  |
| Mxra8         | 1.567907     | 1.58  |
| Kif5b         | 0.750673272  | 3.32  |
| Igfbp7        | 1.026760237  | 2.5   |
| Rexo2         | 0.8760945    | 3     |
| Egf           | -1.857576    | -1.42 |
| Cst3          | 1.244479     | 2.12  |
| Ptgfrn        | 0.72345395   | 3.7   |
| Cd34          | 0.9587386    | 2.81  |
| Nt5e          | 0.9159275    | 3     |
| Ckap4         | 1.076560525  | 2.58  |
| Usp47         | 0.929660767  | 3     |
| Lrp1          | 0.99999315   | 2.86  |
| Fhl1          | 1.02868665   | 2.82  |
| Stxbp1        | 0.87680005   | 3.32  |
| Cspg4         | 0.97460265   | 3     |
| Cnn2          | 0.7628644    | 4     |
| Aldh5a1       | -1.045579    | -2.94 |
| Ltbp4         | 0.8987932    | 3.58  |
| Gstk1         | -1.428366    | -2.26 |
| Bgn           | 2.051119333  | 1.58  |
| Akap1         | -0.98573685  | -3.32 |
| Aldh1a1       | 1.897547     | 1.74  |
| Prelp         | 1.22597085   | 2.7   |
| Maob          | -1.659434    | -2    |
| Ephx1         | 1.199931     | 2.81  |
| Myh10         | 1.0222074    | 3.33  |
| Acot1         | -1.5110005   | -2.28 |
| Rpl3l         | -2.00224     | -1.81 |
| Naalad2       | 1.328874     | 2.74  |
| Vwf           | 2.173947     | 1.72  |
| Nucb2         | 1.152745     | 3.32  |
| Efhd2         | 1.157175     | 3.46  |
| Enpp1         | 1.27960515   | 3.32  |
| Ctsz          | 1.525370333  | 2.91  |
| Cobll1        | -1.0618476   | -4.32 |
| Hspa1l        | 1.172616     | 4     |

|        |              |       |
|--------|--------------|-------|
| Lmcd1  | 1.669641     | 2.85  |
| Endod1 | 0.91246792   | 5.39  |
| Trim47 | 1.661998     | 3     |
| Rnase4 | 1.287194     | 4     |
| Rtn4   | 1.36690502   | 3.95  |
| Gpt    | -0.98071405  | -5.64 |
| Nppa   | 1.864149     | 3.09  |
| Mfap5  | 2.498177     | 2.32  |
| Rcan1  | 1.9435745    | 3     |
| P4ha1  | 1.477477     | 4     |
| Cygb   | 1.505759     | 4.32  |
| Fah    | -1.316714    | -5    |
| Rcn3   | 1.712699     | 4.17  |
| Rbp1   | 3.303723     | 2.32  |
| Acta1  | 2.74704      | 3.7   |
| Aspn   | 3.2271545    | 4.32  |
| Thbs4  | 3.345517     | 4.46  |
| Tpm2   | 4.54828825   | 3.32  |
| Ctgf   | 3.304527     | 4.7   |
| Myh7   | 3.796983     | 4.82  |
| Ces3   | -4.600041333 | -4.61 |
