# Supplementary material
Source: PubMed Central journal article supplement (PMC2972971)
Supplement: 1013555107_st09.pdf [file 1013555107_st09.pdf]

**Supplemental table S9.** List of the 257 common factors (listed as Gene names) between microarray and proteomic datasets with relative fold change of expression.

| <b>GeneName</b> | <b>Microarray</b> | <b>Proteome</b> |
|-----------------|-------------------|-----------------|
| 1300017J02Rik   | -0.06             | -2.50           |
| Acaa2           | -1.34             | -1.16           |
| Acadvl          | -0.74             | -0.69           |
| Ace             | 1.14              | 1.69            |
| Aco2            | -0.20             | -0.39           |
| Acot1           | -1.51             | -2.28           |
| Acot2           | -0.89             | -2.10           |
| Acs1            | -0.49             | -1.00           |
| Acta1           | 2.75              | 3.70            |
| Actn2           | 0.22              | -1.43           |
| Adprh1          | 0.12              | 1.10            |
| Agl             | -0.45             | 4.00            |
| Ahnak           | 0.02              | 1.03            |
| Ak2             | -0.17             | -1.65           |
| Ak311           | -0.59             | -1.34           |
| Akap12          | 0.94              | 1.22            |
| Aldh1a1         | 1.90              | 1.74            |
| Aldh4a1         | -0.52             | -0.98           |
| Aldh5a1         | -1.05             | -2.94           |
| Anxa2           | 0.57              | 1.19            |
| Anxa5           | 1.12              | 1.79            |
| Apip            | -0.52             | -2.70           |
| Appl1           | 0.28              | 1.32            |
| Asph            | 0.22              | 3.22            |
| Aspn            | 3.23              | 4.32            |
| Atp5b           | -0.18             | -0.32           |
| Atp5h           | -0.22             | 0.28            |
| Atp5j           | -0.16             | 1.12            |
| Aup1            | 0.12              | 4.00            |
| Bag3            | 0.52              | 1.31            |
| Bat3            | -0.13             | -3.32           |
| Bcat2           | -0.90             | -1.24           |
| Bckdha          | -0.77             | -2.00           |
| Bckdhb          | -0.74             | -1.70           |
| Bdh1            | 1.05              | 2.20            |
| Blvrb           | -0.11             | -1.07           |
| Bves            | 0.34              | 1.47            |
| Cab39           | 0.20              | 3.81            |
| Calr            | 0.22              | 1.36            |
| Capn2           | 0.69              | 1.68            |
| Capns1          | 0.21              | 2.91            |
| Carhsp1         | 1.04              | 1.42            |
| Casq2           | 0.20              | 0.76            |
| Ccbl1           | -0.68             | -1.21           |

|         |       |       |
|---------|-------|-------|
| Cd34    | 0.96  | 2.81  |
| Cdc42   | 0.52  | 1.09  |
| Ces3    | -4.60 | -4.61 |
| Ckap4   | 1.08  | 2.58  |
| Ckb     | 1.08  | 0.69  |
| Ckm     | -0.44 | -0.55 |
| Ckmt2   | -0.44 | -1.02 |
| Cltc    | 0.13  | 0.89  |
| Cnn2    | 0.76  | 4.00  |
| Col6a3  | 0.49  | 1.65  |
| Cops4   | 0.18  | 1.85  |
| Coq6    | -0.39 | -1.40 |
| Coq9    | -0.43 | -0.87 |
| Crat    | -0.61 | -1.95 |
| Crip2   | -0.67 | -1.00 |
| Cryab   | 0.18  | 0.80  |
| Cs      | -0.66 | -1.70 |
| Csda    | -0.19 | 4.00  |
| Cst3    | 1.24  | 2.12  |
| Ctgf    | 3.30  | 4.70  |
| Ctnna1  | -0.28 | 1.72  |
| Cul4a   | 0.21  | 3.00  |
| Cyc1    | -0.37 | -0.70 |
| Cycs    | -0.22 | -0.72 |
| Cygb    | 1.51  | 4.32  |
| Dbt     | -0.63 | -2.29 |
| Dci     | -1.11 | -0.83 |
| Ddah2   | 0.64  | 2.09  |
| Decr1   | -1.04 | -0.78 |
| Des     | 0.27  | 1.12  |
| Dld     | -0.28 | -0.69 |
| Dpp3    | 0.50  | 1.93  |
| Dpysl3  | 1.12  | 1.58  |
| Dstn    | 0.88  | 0.96  |
| Dync1i2 | 0.45  | 0.77  |
| Dynll1  | 1.31  | 1.54  |
| Dynll2  | 0.11  | 1.68  |
| Dysf    | -0.13 | 1.73  |
| Echdc2  | -0.46 | -2.06 |
| Echs1   | -0.52 | -1.24 |
| Efhd2   | 1.16  | 3.46  |
| Ehd1    | -0.16 | -2.42 |
| Eif3b   | 0.21  | 2.70  |
| Emd     | 0.27  | 3.58  |
| Endod1  | 0.91  | 5.39  |
| Eno1    | 0.32  | -0.60 |
| Eno3    | -1.00 | -0.75 |
| Ephx1   | 1.20  | 2.81  |

|            |       |       |
|------------|-------|-------|
| Etfa       | -0.29 | -0.78 |
| F2         | -0.23 | 3.58  |
| Fabp4      | -0.94 | -0.63 |
| Fah        | -1.32 | -5.00 |
| Fahd1      | -0.31 | -2.05 |
| Farsa      | -0.09 | -2.32 |
| Fbn1       | 0.86  | 0.83  |
| Fermt2     | -0.07 | 1.70  |
| Fh1        | -0.50 | -1.30 |
| Fhl1       | 1.03  | 2.82  |
| Flna       | 0.25  | 2.00  |
| Fth1       | -0.02 | -2.50 |
| Gimap4     | -0.45 | -1.65 |
| Gja1       | -0.31 | -2.38 |
| Glrx3      | -0.22 | -1.38 |
| Gnal       | -0.16 | 4.00  |
| Gpt        | -0.98 | -5.64 |
| Grhpr      | 0.04  | 0.60  |
| Gsn        | 0.54  | 1.18  |
| Gstk1      | -1.43 | -2.26 |
| Gstz1      | -0.14 | -2.32 |
| Hadh       | -0.46 | -1.18 |
| Hadha      | -0.74 | -0.55 |
| Hbb-b1     | 0.14  | -0.66 |
| Hist2h2aa1 | 0.24  | 2.17  |
| Hmgb1      | 0.16  | 1.18  |
| Hpx        | -0.14 | 0.48  |
| Hsp90ab1   | 0.16  | 0.96  |
| Hsp90b1    | 0.05  | 1.15  |
| Hspa1a     | 1.59  | 1.03  |
| Hspa5      | -0.08 | 0.74  |
| Hspb1      | 0.71  | 0.74  |
| Hspb6      | 0.14  | 0.76  |
| Hspd1      | -0.42 | -1.16 |
| Htra2      | 0.13  | -1.37 |
| ldh1       | -0.51 | -1.49 |
| ldh3a      | -0.47 | -0.86 |
| Igf2r      | -0.25 | 1.81  |
| Igfbp7     | 1.03  | 2.50  |
| Klc1       | 0.29  | 2.25  |
| Krt79      | -0.13 | -4.46 |
| Ktn1       | -0.09 | 1.00  |
| Lancl1     | 0.08  | 3.58  |
| Ldb3       | 0.35  | 0.67  |
| Lgals1     | 1.07  | 1.38  |
| Lmcd1      | 1.67  | 2.85  |
| Lrp1       | 1.00  | 2.86  |
| Lrpap1     | 0.49  | 1.35  |

|         |       |       |
|---------|-------|-------|
| Lrpprc  | -0.88 | -1.66 |
| Lrrc20  | -0.28 | 3.00  |
| Lum     | 1.43  | 0.91  |
| M6prbp1 | -1.19 | -0.84 |
| Macf1   | 0.11  | 3.32  |
| Maob    | -1.66 | -2.00 |
| Mapk14  | -0.29 | -4.32 |
| Mapt    | 0.04  | 2.58  |
| Mdh1    | -0.25 | -0.47 |
| Me3     | -0.68 | -1.39 |
| Mlycd   | -0.76 | -2.32 |
| Mmab    | -0.28 | -3.58 |
| Mpst    | -0.11 | -1.74 |
| Msn     | 0.95  | 1.35  |
| Msr3    | 0.67  | 2.63  |
| Mvp     | 0.73  | 2.42  |
| Myh10   | 1.02  | 3.33  |
| Myh4    | -0.16 | 1.12  |
| Myh7    | 3.80  | 4.82  |
| Myh9    | 0.22  | 1.34  |
| Mylk3   | 0.06  | -2.21 |
| Myo1c   | 0.38  | 2.09  |
| Myom2   | -0.80 | -1.99 |
| Naalad2 | 1.33  | 2.74  |
| Naglu   | 0.25  | 3.58  |
| Nampt   | -1.13 | -1.34 |
| Nap111  | 0.55  | 2.70  |
| Nap114  | -0.11 | 1.39  |
| Ndufa10 | -0.48 | -1.21 |
| Ndufa6  | -0.31 | -1.58 |
| Ndufa9  | -0.44 | -1.19 |
| Nhlrc2  | 0.44  | 1.58  |
| Nme2    | -0.06 | 0.46  |
| Nppa    | 1.86  | 3.09  |
| Nrap    | 0.40  | 4.81  |
| Nt5e    | 0.92  | 3.00  |
| Nucb1   | 0.26  | 3.09  |
| Oat     | -0.11 | -1.71 |
| Oxct1   | -0.34 | -1.12 |
| P4ha1   | 1.48  | 4.00  |
| P4hb    | 0.68  | 1.39  |
| Pccb    | -0.49 | -1.27 |
| Pcyox1  | 0.58  | 3.46  |
| Pdia3   | 0.16  | 0.92  |
| Pdim3   | 0.58  | 3.81  |
| Pex19   | -0.16 | 1.81  |
| Pfn1    | 0.46  | 0.77  |
| Pgam2   | 0.12  | 0.56  |

|           |       |       |
|-----------|-------|-------|
| Pgcp      | 0.03  | -1.66 |
| Pgrmc2    | 0.27  | 1.58  |
| Picalm    | 0.60  | 2.22  |
| Por       | -0.03 | 2.70  |
| Ppp1ca    | -0.09 | 1.55  |
| Ppp1r7    | 0.25  | 1.42  |
| Ppp3ca    | -0.14 | 4.00  |
| Prelp     | 1.23  | 2.70  |
| Psemb4    | 0.21  | -2.13 |
| Psmc2     | 0.24  | 1.14  |
| Psmc3     | 0.14  | 2.81  |
| Psme1     | -1.12 | -1.84 |
| Ptgfrn    | 0.72  | 3.70  |
| Purb      | 0.19  | 3.58  |
| Pycard    | -0.25 | -3.00 |
| Pygm      | -0.45 | -0.55 |
| Rcn3      | 1.71  | 4.17  |
| Rexo2     | 0.88  | 3.00  |
| Rhoa      | 0.09  | 2.35  |
| Rnase4    | 1.29  | 4.00  |
| Rnh1      | 0.39  | 1.27  |
| Rpl3      | -0.07 | 2.58  |
| Rplp0     | 0.08  | -1.08 |
| Rps16     | 0.08  | 2.91  |
| Rsu1      | 0.14  | 2.42  |
| Rtn3      | 0.04  | 4.81  |
| Rtn4      | 1.37  | 3.95  |
| S100a11   | 1.37  | 1.81  |
| Scfd1     | 0.05  | 2.58  |
| Sdpr      | -0.63 | -1.42 |
| Serpina1b | -0.32 | -1.49 |
| Serpinb6b | 0.93  | 0.90  |
| Serpinh1  | 0.77  | 1.29  |
| Sh3bgr    | 0.11  | 1.93  |
| Sirt5     | -0.44 | -1.83 |
| Slc25a11  | -0.56 | -1.81 |
| Slc25a12  | -0.44 | -1.42 |
| Slc25a13  | -0.43 | -0.95 |
| Slc25a4   | -0.32 | -0.71 |
| Smap      | 0.48  | 3.81  |
| Sod2      | -0.71 | -0.91 |
| Sorbs2    | 0.48  | 1.69  |
| Speg      | -0.15 | 1.35  |
| Spg20     | 0.43  | 2.12  |
| Srl       | -0.05 | -0.11 |
| Srprb     | 0.04  | 2.00  |
| Stat3     | 0.17  | 1.27  |
| Sucla2    | -0.20 | -1.48 |

|          |       |       |
|----------|-------|-------|
| Suclg1   | -0.55 | -0.93 |
| Sugt1    | 0.12  | 1.42  |
| Tdrd5    | -0.17 | -2.32 |
| Thbs4    | 3.35  | 4.46  |
| Timm50   | -0.24 | 1.42  |
| Tnni3    | -0.27 | -0.67 |
| Tor1aip1 | -0.11 | 2.81  |
| Tuba1a   | 1.02  | 0.71  |
| Tubb2a   | 1.51  | 0.52  |
| Tubb6    | 0.20  | 1.51  |
| Txn2     | -0.38 | -2.00 |
| Ubqln1   | 0.11  | 1.46  |
| Uqcr     | -0.29 | -3.58 |
| Uso1     | 0.50  | 3.32  |
| Vdac2    | -0.19 | -0.35 |
| Vdac3    | -0.24 | -1.14 |
| Vim      | 1.17  | 0.83  |
| Vps25    | 0.11  | -4.58 |
| Wdr1     | 0.51  | 1.18  |
| Wnk1     | -0.05 | 3.81  |
| Ywhaz    | 0.48  | 0.66  |
