# Supplementary material
Source: PubMed Central journal article supplement (PMC2972971)
Supplement: 1013555107_st10.pdf [file 1013555107_st10.pdf]

**Supplemental table S10.** List of the 63 common factors (listed as Gene names) between microarray and proteomic datasets with relative fold change of expression.

| <b>GeneName</b> | <b>Microarray</b> | <b>Proteome</b> |
|-----------------|-------------------|-----------------|
| Acaa2           | -1.34             | -1.16           |
| Ace             | 1.14              | 1.69            |
| Acot1           | -1.51             | -2.28           |
| Acta1           | 2.75              | 3.70            |
| Aldh1a1         | 1.90              | 1.74            |
| Aldh5a1         | -1.05             | -2.94           |
| Anxa2           | 1.16              | 1.19            |
| Anxa5           | 1.12              | 1.79            |
| Aspn            | 3.23              | 4.32            |
| Bdh1            | 1.12              | 2.20            |
| Carhsp1         | 1.35              | 1.42            |
| Ccbl1           | -1.06             | -1.21           |
| Ces3            | -4.60             | -4.61           |
| Ckap4           | 1.17              | 2.58            |
| Ckb             | 1.08              | 0.69            |
| Cst3            | 1.24              | 2.12            |
| Ctgf            | 3.30              | 4.70            |
| Cygb            | 1.51              | 4.32            |
| Dci             | -1.11             | -0.83           |
| Decr1           | -1.15             | -0.78           |
| Dpysl3          | 1.35              | 1.58            |
| Dynll1          | 1.63              | 1.54            |
| Efhd2           | 1.16              | 3.46            |
| Endod1          | 1.40              | 5.39            |
| Eno3            | -1.00             | -0.75           |
| Ephx1           | 1.20              | 2.81            |
| Fabp4           | -1.37             | -0.63           |
| Fah             | -1.32             | -5.00           |
| Fbn1            | 1.40              | 0.83            |
| Fhl1            | 1.71              | 2.82            |
| Gpt             | -1.49             | -5.64           |
| Gstk1           | -1.43             | -2.26           |
| Hspa1a          | 1.59              | 1.03            |
| Igfbp7          | 1.56              | 2.50            |
| Lgals1          | 1.17              | 1.38            |
| Lmcd1           | 1.67              | 2.85            |
| Lrp1            | 1.42              | 2.86            |
| Lum             | 1.43              | 0.91            |
| M6prbp1         | -1.19             | -0.84           |
| Maob            | -1.66             | -2.00           |
| Msn             | 1.03              | 1.35            |
| Myh10           | 1.91              | 3.33            |
| Myh7            | 3.80              | 4.82            |
| Myom2           | -1.13             | -1.99           |
| Naalad2         | 1.33              | 2.74            |

|         |       |       |
|---------|-------|-------|
| Nampt   | -1.13 | -1.34 |
| Nppa    | 1.86  | 3.09  |
| Nt5e    | 2.07  | 3.00  |
| P4ha1   | 1.48  | 4.00  |
| Picalm  | 1.20  | 2.22  |
| Prelp   | 1.49  | 2.70  |
| Psme1   | -1.12 | -1.84 |
| Ptgfrn  | 1.29  | 3.70  |
| Rcn3    | 1.71  | 4.17  |
| Rnase4  | 1.29  | 4.00  |
| Rtn4    | 1.97  | 3.95  |
| S100a11 | 1.37  | 1.81  |
| Sod2    | -1.01 | -0.91 |
| Sorbs2  | 1.00  | 1.69  |
| Thbs4   | 3.35  | 4.46  |
| Tuba1a  | 1.02  | 0.71  |
| Tubb2a  | 2.20  | 0.52  |
| Vim     | 1.26  | 0.83  |
